# Supplementary material for: Cultural differences in social support seeking: The mediating role of empathic concern
Source: PLoS One. 2021 Dec 30;16(12):e0262001. doi: 10.1371/journal.pone.0262001 (PMC8718000; doi:10.1371/journal.pone.0262001)
Supplement: S2 Data — (XLSX) [file pone.0262001.s006.xlsx]

## Sheet: 已恢复_工作表1
ID	Culture	Gender	Age	SSES	stressevent	stressor	Family	Friend	Romantic	Academic	Health	Financial	Job	Future	Others	other	COVID_19	feel_1	feel_2	feel_3	feel_4	feel_5	Concern_1	Concern_2	Concern_3	Concern_4	Concern_5	Concern_6	Concern_7	Concern_8	Concern_9	Concern_10	Concern_11	Concern_12	Concern_13	EC_1	EC_2	EC_3	EC_4	EC_5	EC_6	EC_7	EC_2R	EC_4R	EC_5R	loneliness_1	loneliness_2	loneliness_3	loneliness_4
110	0	0	28	6	特になし	9	0	0	0	0	0	0	0	0	1	特になし	#NULL!	4	4	4	4	4	3	3	3	2	3	2	2	3	2	2	2	2	2	3	3	3	3	3	3	3	3	3	3	3	2	2	3
372	1	0	34	4	NA	1	1	0	0	0	0	0	0	0	0		#NULL!	5	6	5	4	4	4	3	4	3	3	3	4	4	2	3	3	4	3	3	4	4	4	4	3	4	2	2	2	3	2	3	3
235	1	0	39	3	ok	3	0	0	1	0	0	0	0	0	0		#NULL!	4	6	5	4	5	4	3	4	4	3	4	4	3	3	4	4	3	4	3	4	4	3	4	3	3	2	3	2	3	4	3	2
61	1	#NULL!	22	6	The biggest stressor I faced is being unable to make much progress with my undergraduate thesis, which is a required component to graduate with a bachelors degree from my school.	4	0	0	0	1	0	0	0	0	0		0	7	5	6	4	6	3	4	2	3	2	1	1	2	2	4	4	4	2	4	2	4	2	2	4	4	4	4	4	4	3	2	3
269	1	#NULL!	22	7	My university classes. A couple months ago was the end of the semester, and I had a lot of project work to finish, which was stressful. Now, with the virus situation and the chaos that's been causing, it has been stressful because every week things are changing and it's hard to know what to expect	4	0	0	0	1	0	0	0	0	0		0	5	3	1	3	3	1	1	2	1	1	1	1	2	1	1	1	3	2	4	2	5	3	1	3	4	4	3	5	3	3	2	2
346	1	1	41	#NULL!	I got into credit card debt	6	0	0	0	0	0	1	0	0	0		0	7	7	7	7	7	3	5	3	1	3	5	1	3	3	3	2	5	3	3	3	5	2	2	2	3	3	4	4	3	1	1	4
162	1	1	46	#NULL!	Currently out of work due to Covid 19, can't collect unemployment	6	0	0	0	0	0	1	0	0	0		1	7	7	1	1	1	1	1	1	1	1	1	1	3	1	1	1	4	2	4	1	5	2	2	4	5	5	4	4	4	1	1	4
43	1	#NULL!	23	3	The biggest stress I've had over the past three months has been money. I work on-call with my family's business, but they hardly ever need my help so I don't get paid often enough.	6	0	0	0	0	0	1	0	0	0		0	6	6	2	1	1	3	2	2	1	3	1	1	1	1	1	1	2	1	3	3	5	1	1	5	4	3	5	5	3	1	1	2
299	1	1	20	6	A whole lot of em	6	0	0	0	0	0	1	0	0	0		#NULL!	7	7	5	7	7	5	4	2	2	2	4	2	4	4	4	3	4	4	4	1	5	1	1	4	5	5	5	5	3	1	2	3
183	0	0	43	1	家族の金遣い	1	1	0	0	0	0	0	0	0	0		0	5	5	4	4	3	3	3	3	3	3	3	3	3	3	3	3	3	3	3	3	3	3	3	3	3	3	3	3	2	3	3	2
217	0	0	44	1	親子間での言い争い。	1	1	0	0	0	0	0	0	0	0		0	6	6	5	2	4	2	2	2	2	3	3	2	2	2	3	4	2	4	2	3	3	3	3	3	3	3	3	3	1	4	4	1
412	0	1	36	1	ある曜日は火を使用してはいけない、という聖書に記載してある決まりを実行したいのですが、親と同居しているため、それが叶わず…。お湯を使用したりストーブをたいたりする親に対して、ストレスを感じたことだと思います。	1	1	0	0	0	0	0	0	0	0		0	7	7	6	1	5	2	2	2	4	4	4	2	2	1	3	4	3	3	1	4	4	3	3	3	2	2	3	3	1	4	4	1
448	0	1	44	1	家族に日用品を無断で捨てられた	1	1	0	0	0	0	0	0	0	0		0	5	6	2	2	2	1	1	1	3	1	1	1	1	1	1	1	1	1	2	2	3	3	3	2	2	4	3	3	1	4	4	1
28	0	0	38	2	親	1	1	0	0	0	0	0	0	0	0		0	7	7	1	3	3	3	2	2	2	2	2	2	2	2	2	2	3	2	2	3	3	3	3	3	3	3	3	3	2	3	2	3
32	0	1	55	2	子供の教育に関する悩み	1	1	0	0	0	0	0	0	0	0		0	7	6	5	2	2	3	3	2	1	2	2	1	3	1	2	2	3	3	2	3	3	2	3	3	2	3	4	3	1	4	3	2
74	0	0	57	2	夫婦仲がうまくいっていない弟と大喧嘩をしてしまった。	1	1	0	0	0	0	0	0	0	0		0	6	6	2	1	1	2	3	2	2	4	1	2	4	1	4	2	4	4	2	2	4	2	2	3	4	4	4	4	1	4	4	3
84	0	1	32	2	家庭内不和が原因で毎日居場所がない状態です。	1	1	0	0	0	0	0	0	0	0		0	7	7	6	3	2	3	4	3	4	4	4	3	3	2	3	4	3	3	3	3	3	3	2	1	2	3	3	4	2	4	3	2
157	0	0	42	2	家族が大声で騒ぎ立てたので仕事に集中できなかった。	1	1	0	0	0	0	0	0	0	0		0	6	7	2	3	2	3	4	3	4	3	2	3	4	1	2	4	4	4	3	2	4	2	2	2	4	4	4	4	3	2	2	3
220	0	1	29	2	結婚しろと母から言われたことに強いストレスを感じた。	1	1	0	0	0	0	0	0	0	0		0	7	7	2	2	2	2	1	1	4	3	3	1	2	2	5	4	3	5	3	3	3	3	2	4	2	3	3	4	2	4	4	1
263	0	0	63	2	娘と同棲させてくれと、娘の交際相手が突然家に来た	1	1	0	0	0	0	0	0	0	0		0	6	4	3	4	3	2	2	3	4	2	4	2	4	1	2	1	4	2	2	3	3	2	2	2	3	3	4	4	2	3	3	2
295	0	0	40	2	家族の職場での愚痴を毎日のように長時間聞かされている事	1	1	0	0	0	0	0	0	0	0		0	7	7	3	1	2	2	4	2	1	3	4	2	3	1	3	4	5	3	4	1	3	1	1	3	3	5	5	5	2	4	2	3
361	0	1	43	2	家族と１２年ぶりに再会するも再度絶縁	1	1	0	0	0	0	0	0	0	0		0	6	7	1	5	5	1	3	1	4	4	4	1	3	3	4	3	3	5	1	5	4	4	3	5	4	1	2	3	2	4	4	1
399	0	0	43	2	虐待で子供を死なせた容疑者の裁判などのニュースが報道されるたびに、自分自身の経験を思い出し、とても嫌な気持ちになったことがストレスとなった。	1	1	0	0	0	0	0	0	0	0		0	7	7	1	1	1	4	4	3	4	5	5	2	4	2	4	5	5	4	3	1	4	2	2	3	4	5	4	4	2	3	4	2
431	0	0	42	2	親戚との付き合い	1	1	0	0	0	0	0	0	0	0		0	6	6	3	4	4	3	3	3	3	4	5	3	5	3	5	5	4	3	3	3	3	3	3	3	3	3	3	3	2	4	4	2
450	0	1	41	2	祖母の車の事故	1	1	0	0	0	0	0	0	0	0		0	6	7	6	2	1	5	4	2	1	5	4	1	4	1	2	5	5	4	2	2	2	3	3	4	2	4	3	3	1	4	3	2
461	0	1	37	2	私は難病の母を在宅介護していたのですが、約一か月ほど前から、全く立つことができないくらい体調が悪くなり、それで緊急入院することになり、私は非常に不安になり、気持ちが落ち着かなかったことです。	1	1	0	0	0	0	0	0	0	0		0	7	7	7	3	3	3	4	3	2	3	3	2	3	2	4	4	4	4	2	2	3	2	2	3	2	4	4	4	2	4	4	2
125	0	1	57	2	ADHDの孫の面倒を見なければならない立場にあり、新型ウィルス感染対策による休校で毎日一緒に過ごすことが、今一番のストレスになっています。	1	1	0	0	0	0	0	0	0	0		1	7	3	6	2	3	4	2	1	2	2	2	1	1	3	2	1	2	1	4	3	4	2	2	5	4	3	4	4	2	3	4	3
302	0	0	39	2	田舎に住んでてコロナの影響で人混みに行きたくないのですが従兄弟の結婚式が東京であってそこまで親密でもないし遠いし自分は遠慮しようとした。その事で兄が行けと命令してきて大喧嘩になった。	1	1	0	0	0	0	0	0	0	0		1	6	6	4	3	3	2	3	3	2	2	2	3	2	2	2	2	3	2	2	2	3	2	3	3	3	4	4	3	1	3	2	2
18	0	0	44	3	親の介護	1	1	0	0	0	0	0	0	0	0		0	6	4	3	6	6	1	3	3	3	3	5	3	3	1	1	1	3	1	2	4	4	3	2	3	3	2	3	4	3	4	2	3
50	0	0	50	3	家族との不和	1	1	0	0	0	0	0	0	0	0		0	6	6	1	1	1	3	4	3	3	4	3	3	4	3	4	4	4	4	2	4	4	3	2	3	3	2	3	4	3	2	2	3
87	0	0	41	3	父が亡くなり、その事に伴う一連の出来事。	1	1	0	0	0	0	0	0	0	0		0	6	7	6	3	3	2	4	3	3	2	4	2	4	2	2	2	5	3	3	3	3	2	2	2	3	3	4	4	2	3	3	3
91	0	0	27	3	母親が乳癌の再発をした	1	1	0	0	0	0	0	0	0	0		0	7	7	5	3	3	3	2	3	2	3	3	3	2	3	3	3	5	3	5	3	3	3	3	3	3	3	3	3	2	3	3	2
128	0	1	42	3	家族の問題	1	1	0	0	0	0	0	0	0	0		0	7	7	7	4	4	5	5	5	5	5	5	5	5	1	1	1	5	5	1	3	3	2	2	5	4	3	4	4	2	2	2	2
155	0	1	52	3	携帯電話の機種交換です。夫が契約者なのですが、土日はしんどくて、平日は忙しい...とのことで、どうするかすごく悩みました。	1	1	0	0	0	0	0	0	0	0		0	6	4	5	6	5	3	3	3	2	2	3	3	3	2	2	2	2	2	4	2	4	1	1	5	4	4	5	5	3	2	1	3
173	0	1	26	3	不妊治療を行っており、これが一番のストレスです。夫との治療についての考えの不一致や私ばかりが病院に行きつらい検査、服薬をしなけれないけない状況。	1	1	0	0	0	0	0	0	0	0		0	7	7	5	7	7	5	5	5	5	2	5	1	5	1	5	5	5	5	5	2	5	1	1	5	3	4	5	5	3	3	2	3
258	0	0	43	3	親の病気	1	1	0	0	0	0	0	0	0	0		0	6	6	5	4	5	3	3	1	4	2	2	1	3	2	4	4	3	3	1	4	3	3	4	1	2	2	3	2	1	4	4	1
268	0	0	37	3	叔母の病気	1	1	0	0	0	0	0	0	0	0		0	7	7	2	7	4	3	3	3	3	3	2	3	3	3	3	3	4	3	2	2	3	2	3	4	3	4	4	3	3	3	2	3
329	0	0	35	3	妻から大事にしている荷物を勝手に捨てられたことが最も大きなストレスです。	1	1	0	0	0	0	0	0	0	0		0	7	6	3	5	6	3	3	2	1	2	3	2	3	2	2	2	3	2	1	4	1	4	4	4	1	2	2	2	4	1	1	4
353	0	1	23	3	仕事に関して家族との意見のぶつかり合い	1	1	0	0	0	0	0	0	0	0		0	5	5	5	4	3	3	5	3	2	4	1	2	4	1	1	1	5	3	4	2	4	2	1	4	4	4	4	5	3	2	2	3
364	0	1	37	3	父からのモラハラ	1	1	0	0	0	0	0	0	0	0		0	7	7	5	1	1	5	4	1	1	4	2	1	4	3	2	2	4	4	3	3	4	1	3	4	3	3	5	3	2	4	3	2
380	0	0	44	3	同居する母との人間関係、性格の不一致	1	1	0	0	0	0	0	0	0	0		0	6	6	5	3	5	4	3	1	3	2	2	1	3	1	2	3	4	3	4	3	4	3	3	4	3	3	3	3	2	4	3	2
398	0	1	41	3	家族との不和。夫が勝手に別居をはじめ、離婚調停を申し立てられた。現在、調停中。	1	1	0	0	0	0	0	0	0	0		0	7	7	7	1	1	4	4	3	3	3	4	2	2	2	1	3	4	3	4	2	4	2	2	4	4	4	4	4	2	2	1	3
458	0	0	33	3	家族との付き合い等、断りたくても断れない場合や、相手に気を使おうとしてストレスが溜まる。	1	1	0	0	0	0	0	0	0	0		0	6	4	6	3	4	4	4	3	2	3	3	2	4	2	4	5	5	3	3	2	4	3	2	4	3	4	3	4	1	4	3	1
489	0	1	23	3	祖母と母親の喧嘩	1	1	0	0	0	0	0	0	0	0		0	6	5	2	5	2	2	4	1	3	4	3	1	4	1	2	5	4	5	1	2	2	2	3	3	3	4	4	3	2	4	3	3
11	0	0	53	3	コロナウイルスの関係で、これまでの仕事が打ち切りとなり、そのことで家庭内の雰囲気が悪くなり日常生活の非常なストレスを感じています。	1	1	0	0	0	0	0	0	0	0		1	6	7	7	1	1	3	4	3	4	4	3	2	4	3	4	4	3	4	2	1	4	1	1	4	3	5	5	5	2	3	3	3
33	0	1	38	4	妊娠中でしんどい思いをすることが多いが、夫は何も気づかずいつも通り生活している。こちらから頼まなければ何も手伝ったり代わったりしてくれない。もっと気遣ってほしい。	1	1	0	0	0	0	0	0	0	0		0	7	7	3	5	5	2	4	4	4	4	4	4	4	4	3	5	4	4	2	4	2	2	4	2	2	2	4	2	2	3	3	2
92	0	1	43	4	高齢の両親と同居しています。私は家事手伝いです。母とは比較的うまくいっているのですが、私はしょっちゅう母の言動に対して強く文句を言ってしまいます。また、家族を顧みない父も大きなストレスです。	1	1	0	0	0	0	0	0	0	0		0	6	6	5	2	3	1	2	2	1	1	2	2	2	2	3	2	2	3	2	2	3	2	4	5	2	4	4	2	2	3	1	4
122	0	0	35	4	子供の成長について悩んでおり、言葉を話す時期なのに子供が言葉を話し始めない事に対してストレスや不安を感じています。	1	1	0	0	0	0	0	0	0	0		0	6	6	6	2	2	3	4	3	3	3	2	2	3	2	3	2	3	3	2	3	2	4	4	2	2	3	2	2	2	3	2	3
141	0	1	56	4	夫が抑うつ状態で休職しており、家に引きこもり状態、経済的にも厳しいです。	1	1	0	0	0	0	0	0	0	0		0	7	7	2	1	2	3	3	4	4	3	4	3	4	2	4	3	4	4	4	2	4	2	2	4	3	4	4	4	4	1	1	4
207	0	0	37	4	妻が乳がんになりメンタルにも不調をきたし、日常生活が変わってしまった。	1	1	0	0	0	0	0	0	0	0		0	6	7	5	3	2	4	5	4	4	5	2	2	2	1	1	1	2	2	3	3	4	3	2	4	3	3	3	4	3	3	2	2
218	0	0	50	4	父親に癌が見つかったが、病院から認知症を患っているので、検査・診察の度に来てくださいと言われ、病院側の都合で日時が一方的に決められたので、仕事との両立が上手く行かず、ストレスが溜まった。	1	1	0	0	0	0	0	0	0	0		0	7	7	5	2	2	5	5	2	5	2	4	1	5	1	5	5	3	2	3	2	3	1	2	4	4	4	5	4	2	3	4	1
229	0	0	52	4	８０歳を超えた父親が更にワガママになり、家族の外出時間にまで異様に気にする様になった事です。	1	1	0	0	0	0	0	0	0	0		0	7	7	1	2	2	4	3	2	3	4	3	3	4	2	3	5	5	4	3	2	4	2	2	4	5	4	4	4	2	2	1	4
255	0	1	49	4	自分自身は就労を希望しているにもかかわらず、家族の現状から選択肢がほぼ存在しないという行き詰まった感覚が拭えない。	1	1	0	0	0	0	0	0	0	0		0	7	7	4	1	3	3	3	3	4	3	2	2	3	2	2	2	3	3	4	3	3	2	2	4	4	3	4	4	2	3	2	2
269	0	1	27	4	夫婦間のトラブルです。 夫が何度注意しても生活態度を改めず、私からの指摘に対し逆ギレをして来た時に最も大きなストレスを感じました。	1	1	0	0	0	0	0	0	0	0		0	7	7	5	3	3	4	4	3	2	2	2	3	2	3	5	1	5	1	4	3	5	2	2	5	4	3	4	4	3	2	2	3
288	0	1	55	4	3年前に他界した母の財産分与を、昨年しました。母の子供は、私と姉の二人です。母の貯金通帳など、大事な書類は姉が握ったまま2年間なんの手続きもしないので、昨年私から働きかけて、1年掛けてやっと財産分与まで漕ぎつけました。私は納得できませんでしたが、姉の言いなりとなり、財産分与は姉が3分の2で、私が3分の1となりました。それでも、手続きしてしまわないと色々と時間切れ（保険金等の手続き上）になってしまうので、仕方なく合意しました。今は、実家の土地家屋の名義変更の手続き中です。姉に言われるがまま、今年の1月に私の書類を送ったのに、その後の手続きが進んだのかどうか、連絡がありません。姉は自分のペースを乱されるとヒステリーを起こすので、どう連絡をとっていいか、わかりません。この間、実家（空き家状態）は火災保険を掛けていない状態なので、とても心配です。	1	1	0	0	0	0	0	0	0	0		0	7	7	6	3	1	4	4	3	1	2	2	3	4	3	1	3	5	2	3	1	4	1	1	5	3	5	5	5	3	2	1	4
293	0	0	29	4	サラリーマンを辞めて独立した時、親に反対されて口論になったこと。	1	1	0	0	0	0	0	0	0	0		0	6	2	2	2	4	2	2	1	5	1	1	1	2	1	2	2	2	3	2	2	3	2	2	4	3	4	4	4	3	3	2	3
311	0	1	31	4	家族が入院した。入院の費用が高かった。	1	1	0	0	0	0	0	0	0	0		0	5	5	3	3	1	4	4	1	1	4	4	1	4	1	1	4	2	5	3	4	4	2	2	5	1	2	4	4	2	1	4	3
337	0	1	46	4	大切な人を平等に大切にする難しさ。	1	1	0	0	0	0	0	0	0	0		0	5	4	5	4	3	3	4	3	3	4	3	3	5	3	2	4	4	2	4	3	5	2	2	5	4	3	4	4	3	3	3	2
354	0	0	39	4	父親が病気で入院したことです。 父親のことが心配になったのと、 医療費のことで不安になり大きなストレスを感じています。	1	1	0	0	0	0	0	0	0	0		0	6	7	6	2	1	2	2	3	4	2	1	2	3	1	1	2	4	2	3	4	3	3	4	2	2	2	3	2	2	3	4	2
378	0	1	46	4	子供の高校受験で、自分の子供がちゃんと高校に受かるのか、他のお子様や保護者にかける言葉で失礼に当たらないかなどがストレスでした	1	1	0	0	0	0	0	0	0	0		0	6	4	5	4	5	4	4	3	3	4	3	3	2	2	2	3	4	3	3	2	4	2	2	3	3	4	4	4	3	2	2	3
394	0	1	32	4	新婚旅行のウエディングフォト・ツアー等の手配。	1	1	0	0	0	0	0	0	0	0		0	7	1	7	6	6	4	4	4	4	3	3	3	3	2	3	2	4	3	2	4	2	3	4	4	4	2	3	2	3	2	2	3
395	0	1	40	4	義理の母が脳梗塞と統合失調症を患い認知症の初期症状も出始めたことで、慣れない介護に苦労しストレスを感じるようになりました。	1	1	0	0	0	0	0	0	0	0		0	7	7	5	5	6	3	2	2	1	3	2	1	2	2	1	1	3	1	5	1	4	1	1	5	4	5	5	5	4	3	2	4
405	0	1	62	4	私に何の相談も無く、配偶者が定年前に勝手に会社を退職し、その後全く働く意思が感じられず、老後の生活費が足りなくて、この先の人生が不安でいっぱいな状態になったこと。	1	1	0	0	0	0	0	0	0	0		0	7	7	4	1	1	3	4	3	2	2	3	3	3	2	2	4	3	1	2	2	5	2	3	4	3	4	4	3	2	2	2	3
453	0	0	39	4	親から「早く結婚しろ」と言われること。	1	1	0	0	0	0	0	0	0	0		0	6	6	4	4	4	2	2	3	3	4	4	3	2	2	3	4	4	4	2	3	3	3	3	3	2	3	3	3	2	3	3	2
481	0	1	43	4	育児が大変でストレスがたまります。	1	1	0	0	0	0	0	0	0	0		0	7	5	4	4	4	3	4	3	3	3	4	2	3	3	3	3	3	3	4	3	3	3	3	3	3	3	3	3	3	2	2	3
491	0	0	47	4	父親の家庭内暴力	1	1	0	0	0	0	0	0	0	0		0	7	7	2	2	1	4	5	3	2	2	2	4	2	2	2	1	4	2	5	1	5	1	1	4	5	5	5	5	1	2	1	4
31	0	1	37	5	夫婦仲がうまく行かない。	1	1	0	0	0	0	0	0	0	0		0	6	6	6	2	2	4	3	2	3	4	3	2	2	2	2	4	3	3	4	3	4	2	2	4	3	3	4	4	3	3	2	4
42	0	1	38	5	自身の体調の変化によるストレス	1	1	0	0	0	0	0	0	0	0		0	6	6	6	6	6	4	4	3	2	3	3	3	3	3	3	3	4	3	3	3	3	3	3	3	3	3	3	3	2	3	2	3
45	0	1	47	5	次男の高校受験の試験から合格発表まで。	1	1	0	0	0	0	0	0	0	0		0	7	6	6	7	7	2	4	2	3	2	2	2	2	1	2	1	3	3	4	2	5	1	5	4	5	4	5	1	3	2	2	3
48	0	0	57	5	子供と気が合わず一緒にいるのが辛い、特に土日祝日。	1	1	0	0	0	0	0	0	0	0		0	6	6	5	3	5	4	4	3	3	3	3	3	3	3	3	3	4	4	3	2	4	2	2	3	2	4	4	4	3	3	3	2
108	0	1	42	5	主人が異動になり、引越しをしました。元々いた営業所でも嫌がらせをする人がいて、職場の愚痴が絶えなかったので、この異動で安心したのですが、異動した先でも人間関係が良くないようで、また職場での愚痴が始まり、怒りを私にぶつけてきて大声を出して怒り出すことがストレスです。	1	1	0	0	0	0	0	0	0	0		0	6	7	3	2	4	1	3	3	5	3	1	3	3	1	1	1	3	3	4	2	4	2	2	4	3	4	4	4	2	4	3	3
111	0	1	57	5	やっと再就職した夫の仕事が日給制で、ここ2，3か月仕事がほとんどありません。マイナス思考の夫が毎日家にいて何もせず座ってばかりいることに、ストレスを感じています。	1	1	0	0	0	0	0	0	0	0		0	5	5	4	3	2	4	4	3	4	2	2	3	4	2	2	3	4	4	3	2	4	2	2	4	4	4	4	4	2	3	2	3
190	0	1	44	5	疎遠な母親から電話がかかってきた	1	1	0	0	0	0	0	0	0	0		0	6	6	4	4	5	2	4	1	3	5	5	1	3	1	3	5	5	5	1	3	4	2	2	3	3	3	4	4	3	4	3	1
205	0	0	38	5	家族の者の耳が遠く、何度も同じことを繰り返し話さねばならなかった。	1	1	0	0	0	0	0	0	0	0		0	6	5	2	2	1	1	5	4	4	5	4	3	5	2	4	3	5	4	1	3	4	2	3	4	5	3	4	3	3	2	2	3
252	0	1	29	5	夫との家事育児の分担による意見の相違。	1	1	0	0	0	0	0	0	0	0		0	7	5	7	6	6	4	4	2	4	4	2	2	4	2	4	4	2	4	5	3	4	2	2	4	4	3	4	4	3	3	4	2
266	0	1	42	5	父と愛猫が闘病の末亡くなったこと	1	1	0	0	0	0	0	0	0	0		0	6	6	6	4	4	4	4	4	3	3	3	2	4	2	2	3	5	4	4	3	4	1	2	4	4	3	5	4	2	3	2	4
278	0	1	46	5	飼育放棄された保護犬を譲り受けました。先住犬との折り合いが良くないようで体調を崩したり攻撃的になったりしているので目が離せません。	1	1	0	0	0	0	0	0	0	0		0	7	5	7	4	3	4	4	3	2	2	4	3	3	1	3	3	3	4	3	2	3	2	2	4	3	4	4	4	4	3	1	4
326	0	1	36	5	姉とのケンカ	1	1	0	0	0	0	0	0	0	0		0	5	5	1	5	4	3	3	2	2	4	5	2	2	3	3	2	4	2	3	3	3	1	2	4	4	3	5	4	3	2	1	4
349	0	1	47	5	旦那が無職になってから１年就職活動をしてくれない	1	1	0	0	0	0	0	0	0	0		0	6	6	3	2	2	3	2	3	2	3	3	3	3	4	3	2	3	3	3	3	3	3	4	3	4	3	3	2	3	3	3	2
419	0	0	42	5	長男の反抗期の事で悩んでます。 中学一年生の長男なのですが、言葉遣いは悪い、勉強はしないでゲームばかりで、注意するとすごく反抗してくるので、手に負えませんで悩んでます。	1	1	0	0	0	0	0	0	0	0		0	6	5	6	2	2	3	3	2	2	3	4	4	4	3	3	4	3	3	4	3	4	3	4	4	2	3	3	2	3	1	2	2
428	0	0	58	5	田舎で一人暮らしをしていた83歳の母が体調を崩し、同居をスタート。食べ物の好き嫌いが多かったり、神経質で夜は物音がすると眠れなかったり、文句も言いたい放題。最も大きなストレスの要因です。	1	1	0	0	0	0	0	0	0	0		0	7	4	6	2	4	1	1	3	1	4	4	1	1	1	1	2	1	4	3	1	4	1	1	4	4	5	5	5	3	2	1	3
436	0	1	31	5	家庭崩壊及び両親の不仲が最も大きなストレス要因です。現在私は実家暮らしなのですが、両親の喧嘩が激化しており毎日のように暴れる父親を何とか落ち着かせることが常習化しています。 元々私が子供の頃から両親の不仲は明白であり、特に父親の暴言やヒステリックな言動に度々恐怖を覚えたり、小学1年生の時には既に体を張って父親の暴力を食い止めるなどしていました。かと言って父親の言動によって悲しんだり怒るような素振りを少しでも見せようものならば物を投げつけられて父親に激昂されましたから、いくら理不尽な思いや痛い経験をしても我慢する癖が付きました。 そんな父親は今でも暴力的かつ高圧的で、母親と毎日のように喧嘩をしています。直近の3カ月だけでも、10回以上は止めに入った私の体中に痣が出来る程の暴れ方をしていました。 夫婦喧嘩の元を正せば父親が結婚して直ぐに母親を女性として扱わなくなったことが原因なのだと聞いてい…	1	1	0	0	0	0	0	0	0	0		0	7	6	7	3	3	5	5	3	2	5	4	2	5	2	3	4	5	5	4	2	3	2	2	4	3	4	4	4	3	4	3	1
439	0	0	49	5	親の介護支援	1	1	0	0	0	0	0	0	0	0		0	5	5	5	4	4	2	2	3	4	3	3	4	4	3	3	4	4	4	2	3	3	3	2	4	4	3	3	4	3	2	3	3
443	0	0	48	5	両親の加齢や健康上の問題からくる精神的疲労。 日が昇らない時間に起きて扉をバタンバタンと大きな音をたてるため目が覚めてしまい慢性的な睡眠不足に。また両親とも足と腰が悪いことと父が脳梗塞を持っている事で、常に気を張って注視していなければならない。	1	1	0	0	0	0	0	0	0	0		0	6	6	4	2	3	4	2	2	1	3	1	2	2	1	1	1	4	1	4	2	4	2	2	3	3	4	4	4	2	4	2	3
471	0	0	46	5	家族の病気：妻の病状が悪化して、その介抱によるストレス。	1	1	0	0	0	0	0	0	0	0		0	6	6	4	3	2	2	4	3	2	4	5	3	3	3	4	2	3	4	2	4	4	3	2	4	4	2	3	4	3	3	2	4
486	0	0	57	5	親の体調がすぐれず、医者へ行っても不調の原因がなかなかわからなかったこと	1	1	0	0	0	0	0	0	0	0		0	6	6	2	4	5	3	2	3	3	3	3	3	3	2	3	3	4	3	2	3	3	3	3	3	3	3	3	3	3	1	2	3
105	0	1	36	5	小学生の長男がコロナによる休校で毎日家にいます。三男（乳児）の世話もあり、ついイライラして長男にあたってしまう自分にストレスを感じています。	1	1	0	0	0	0	0	0	0	0		1	6	6	6	2	2	2	1	3	4	2	4	2	3	1	4	4	3	4	2	2	4	2	2	3	2	4	4	4	3	3	1	4
2	0	1	31	6	実家の家の相続をどうするかでストレスを感じました。兄は病気があるので、私が今後整理していかないといけないことに直面し、不安と恐怖でいっぱいになりました。	1	1	0	0	0	0	0	0	0	0		0	6	5	7	2	5	3	3	2	1	3	2	2	2	2	2	5	5	4	1	1	5	1	1	5	3	5	5	5	4	1	1	4
60	0	1	44	6	母が体調を崩し、もしかしたら重大な病気かもしれない・・・とうことで病院で検査が続く日々を過ごしました。	1	1	0	0	0	0	0	0	0	0		0	6	6	5	5	5	2	3	3	3	4	4	3	3	2	2	4	3	4	3	2	4	3	3	4	3	4	3	3	3	2	2	3
71	0	1	52	6	病気で入院していた父親がそのまま病院で亡くなり、年老いた母親が一人暮らしを始めたため、何かと心配事が増えた。	1	1	0	0	0	0	0	0	0	0		0	6	4	6	6	6	3	3	5	1	2	2	4	1	1	1	2	3	3	5	1	5	1	1	5	5	5	5	5	4	1	1	4
99	0	0	58	6	妻の仕事が忙しく、帰ってくるのが夜遅くなる日々が続いた事	1	1	0	0	0	0	0	0	0	0		0	6	4	5	4	3	2	4	2	2	3	4	2	2	2	2	4	4	2	3	2	4	2	2	4	2	4	4	4	3	3	2	3
106	0	1	47	6	ペットの猫が亡くなったこと。	1	1	0	0	0	0	0	0	0	0		0	7	7	7	2	2	3	3	3	2	3	3	3	3	2	3	2	3	3	3	3	3	2	3	4	4	3	4	3	3	3	2	3
160	0	1	33	6	夫の言動	1	1	0	0	0	0	0	0	0	0		0	5	3	2	4	6	3	2	3	1	1	2	3	1	1	1	4	1	1	4	1	4	2	2	4	4	5	4	4	4	1	1	4
166	0	0	53	6	社会人の息子が消費者金融から多額の借金をしてうるのが発覚したこと。	1	1	0	0	0	0	0	0	0	0		0	7	7	7	5	4	3	4	2	2	3	4	2	4	3	3	4	4	4	2	2	3	3	2	3	4	4	3	4	3	3	2	3
192	0	1	35	6	家族の病気と、自分自身の体調不良・将来不安など	1	1	0	0	0	0	0	0	0	0		0	7	7	5	2	2	3	3	3	4	5	4	3	4	2	3	3	2	4	4	3	4	1	3	3	4	3	5	3	2	3	3	3
202	0	1	44	6	息子の大学受験失敗	1	1	0	0	0	0	0	0	0	0		0	6	6	6	2	2	3	3	1	1	1	1	1	1	1	4	4	2	4	2	3	2	2	4	5	3	3	4	2	3	2	1	4
264	0	1	32	6	夫との関係。子育てに疲れているが家庭のこともしないといけないため最低限のことをしているつもりだったが夫はもっとこうあってほしい（家をきれいに、洗濯物の干し方）などの思いがあり我慢ができず言い合いになった。	1	1	0	0	0	0	0	0	0	0		0	7	5	5	4	2	3	4	1	1	1	1	2	1	1	3	1	5	2	2	1	4	2	1	4	3	5	4	5	3	1	1	4
294	0	1	36	6	主人が家事や育児を手伝ってくれず、私だけ毎日疲れることが最近ストレスを感じた出来事です。	1	1	0	0	0	0	0	0	0	0		0	6	6	3	4	5	2	2	1	1	1	1	1	1	1	1	1	2	1	2	4	2	4	4	5	2	2	2	2	3	1	1	4
335	0	1	44	6	夫の嘘	1	1	0	0	0	0	0	0	0	0		0	7	7	1	1	4	3	4	3	4	4	5	2	3	3	5	5	4	5	4	2	4	2	2	4	4	4	4	4	2	2	2	3
340	0	1	43	6	旦那の転職により収入が激減して月々のやりくりが辛くなった事。	1	1	0	0	0	0	0	0	0	0		0	6	5	1	3	4	2	2	1	2	3	3	3	4	3	1	1	1	1	2	3	2	3	2	4	2	3	3	4	2	2	1	1
351	0	1	33	6	祖母の偏食や食べ物のお残しに対する我儘さに対し、メニュー日々を考え、お残しと口に合わないばかり言う文句に耐える日々がストレスです。	1	1	0	0	0	0	0	0	0	0		0	7	4	4	1	4	4	2	3	3	3	3	3	4	2	4	3	4	4	3	3	2	3	3	4	3	3	3	3	2	3	3	3
365	0	0	64	6	従兄が亡くなった	1	1	0	0	0	0	0	0	0	0		0	6	6	1	4	5	2	3	2	4	2	2	3	2	3	2	2	4	4	2	2	3	1	2	4	4	4	5	4	3	1	2	4
410	0	1	31	6	海外の自宅から2週間日本に帰国したが、自分たちの家がないのでホテルや実家・義実家にお世話になり続けたこと。	1	1	0	0	0	0	0	0	0	0		0	5	2	5	6	6	4	4	3	4	4	5	3	4	2	4	4	4	4	4	2	4	2	2	5	5	4	4	4	4	3	1	4
482	0	1	31	6	夫の育児不参加	1	1	0	0	0	0	0	0	0	0		0	6	6	5	3	3	4	4	2	3	2	2	2	2	2	3	2	4	4	2	4	3	3	3	3	2	2	3	3	3	2	2	3
485	0	1	48	6	旦那の母親（姑）から、子供達を連れて帰省しろと言われた。上の子は春休みに入っていた為大丈夫だが、下の子は新高校3年になる為、塾で受験講座が始まり帰れない。自分もそう簡単に休みが取れない事伝えるが、シツコく言ってきた。最後は旦那が上の子連れて帰省した。それ以来、何か言われるのが面倒なので一切連絡取らないことにした。	1	1	0	0	0	0	0	0	0	0		0	7	4	2	4	5	1	1	5	1	1	1	5	1	1	1	1	1	1	4	3	4	2	4	4	2	3	4	2	3	2	2	3
121	0	1	29	6	家族にコロナウイルスが蔓延しているからマスクをしてほしいと指摘したら、逆ギレをされてしまったことです。家族はその日仕事上の問題で機嫌が悪く、間が悪かったと後に言われました。	1	1	0	0	0	0	0	0	0	0		1	7	6	3	6	4	4	2	3	3	4	4	2	2	2	4	3	2	2	2	4	2	4	4	4	3	2	2	2	3	3	2	3
107	0	1	55	7	母の大腿部骨折、手術、入院	1	1	0	0	0	0	0	0	0	0		0	7	7	5	4	4	4	4	4	3	2	2	3	3	2	2	2	2	2	3	1	5	1	1	4	4	5	5	5	3	2	1	3
206	0	0	37	7	母親の足腰が弱っており自力で立ち上がることができなくなり入院して治療が必要になった	1	1	0	0	0	0	0	0	0	0		0	5	7	5	3	3	3	2	2	3	3	3	2	3	3	3	3	4	3	3	3	3	3	3	4	4	3	3	3	3	2	2	3
237	0	0	45	7	父が亡くなり葬儀など経験したことがない事に直面したこと	1	1	0	0	0	0	0	0	0	0		0	7	7	4	5	4	3	4	3	2	2	2	4	4	2	2	2	4	3	3	1	4	2	2	4	3	5	4	4	3	2	2	1
253	0	1	42	7	パスポート申請書類を作成するにあたり、父と喧嘩をしました。	1	1	0	0	0	0	0	0	0	0		0	7	7	5	6	3	1	4	3	1	3	5	3	4	4	5	4	3	5	2	2	3	2	3	2	3	4	4	3	3	4	2	2
299	0	1	40	7	妹との口論	1	1	0	0	0	0	0	0	0	0		0	7	3	3	2	3	3	4	2	2	3	1	2	2	2	1	2	4	2	2	2	3	2	4	4	3	4	4	2	3	3	1	4
315	0	0	40	7	姉夫婦の仲が悪く子供が可哀想	1	1	0	0	0	0	0	0	0	0		0	7	7	5	1	1	3	3	3	3	3	3	3	3	3	3	3	5	3	3	3	3	3	3	3	3	3	3	3	3	3	2	3
492	0	1	33	7	この2月に婚姻届けを出して結婚したが、それに際してパートナーと、それぞれの実家との距離感などの考え方の違い等が表面化した。	1	1	0	0	0	0	0	0	0	0		0	6	4	3	4	5	3	3	2	3	4	4	2	3	2	2	3	4	3	3	3	4	2	2	4	3	3	4	4	3	2	2	3
102	0	1	46	7	新型コロナウィルスで、子供の学校が休校になりました。それ自体はしょうがないと思いますが、私は派遣社員として勤務しているので、休校中は、誰が子供の世話をするのか、お昼ごはんはどうするのか、その対応で大きなストレスを感じました。	1	1	0	0	0	0	0	0	0	0		1	5	5	4	4	5	3	4	3	4	3	2	3	3	2	3	2	4	3	4	2	4	2	2	4	4	4	4	4	3	1	2	4
198	0	0	56	8	会話をしている時に、配偶者が自分を正当化しよう、もしくは自分の意見を押し通そうとして屁理屈を言う	1	1	0	0	0	0	0	0	0	0		0	7	7	3	2	1	2	2	2	2	2	2	2	2	2	2	3	2	2	3	4	4	2	4	4	3	2	4	2	2	3	3	2
236	0	0	40	8	家族（妻）の病気	1	1	0	0	0	0	0	0	0	0		0	7	6	5	4	4	3	3	2	4	4	2	2	3	3	2	2	4	3	2	3	4	2	3	4	4	3	4	3	3	3	2	3
250	0	1	20	8	離れて住む母親と喧嘩した	1	1	0	0	0	0	0	0	0	0		0	7	7	7	7	4	4	5	2	1	5	5	1	4	4	5	4	3	5	5	3	5	2	1	5	3	3	4	5	2	4	3	2
214	0	1	43	2	職場の同僚に毎日イライラしている	2	0	1	0	0	0	0	0	0	0		0	7	6	2	1	2	2	2	3	3	4	3	3	2	3	4	4	3	3	2	3	3	3	3	3	4	3	3	3	2	2	2	2
336	0	0	37	3	人間関係がストレスの要因になっています。 友人との交友関係が以前よりもめんどくさくなってきてあまり友人に関心がなくなっていること	2	0	1	0	0	0	0	0	0	0		0	5	5	5	3	3	4	5	4	4	2	4	4	5	4	4	5	4	5	4	2	4	2	2	4	4	4	4	4	3	2	2	3
345	0	1	31	3	仲の良い友人との価値観の相違	2	0	1	0	0	0	0	0	0	0		0	7	7	4	3	3	5	5	1	4	1	1	1	5	1	4	1	5	5	1	4	1	5	4	5	5	2	1	2	1	4	4	3
466	0	0	40	3	人間関係	2	0	1	0	0	0	0	0	0	0		0	5	6	4	4	4	3	4	2	3	4	4	2	4	3	4	3	4	4	1	3	3	3	3	3	3	3	3	3	3	3	2	2
119	0	0	30	6	友人の死	2	0	1	0	0	0	0	0	0	0		0	7	7	5	1	1	4	2	3	4	4	4	3	4	2	4	4	4	4	2	4	2	4	2	4	3	2	2	4	2	3	3	2
366	0	0	43	6	人間関係	2	0	1	0	0	0	0	0	0	0		0	4	5	2	3	5	2	4	4	3	4	5	5	3	2	5	4	4	5	2	4	2	5	4	4	4	2	1	2	3	3	2	4
402	0	1	37	6	人間関係 人と関わることがとても苦手	2	0	1	0	0	0	0	0	0	0		0	5	5	4	2	2	3	4	3	3	3	3	2	3	3	4	3	4	4	3	3	3	2	2	4	3	3	4	4	2	3	4	1
314	0	1	40	7	友人関係で嫌な思いをしました。数年間友人の愚痴を聞いたり相談に乗っていたのに、こちらが大変な時期なのにもかかわらず、また愚痴を言われました。我慢をして、自分も頑張っているから、あなたも頑張ってと言ったところ、相手はそれが気に食わなかったようで、いきなり疎遠にされました。	2	0	1	0	0	0	0	0	0	0		0	7	7	4	2	2	5	5	3	4	4	3	3	4	3	2	2	4	2	4	2	4	2	1	4	3	4	4	5	2	2	3	2
347	0	1	39	8	友達と絶縁したこと。	2	0	1	0	0	0	0	0	0	0		0	6	6	4	3	4	3	4	4	4	4	4	3	4	2	3	2	4	3	4	3	4	2	4	4	4	3	4	2	2	3	3	2
131	0	1	39	2	人間関係	3	0	0	1	0	0	0	0	0	0		0	7	7	1	4	4	4	4	3	5	5	5	3	5	2	5	5	3	5	5	2	5	1	1	4	4	4	5	5	3	3	2	1
333	0	1	26	4	恋人との喧嘩 将来（結婚など）について話しているうちに、お互いの考え方に大きな違いを感じ、話している間に口論となり、別れるか別れないかという話にまで発展した。 結局お互いに歩み寄って頑張ろうと落ち着いたけど、その間がものすごくストレスに感じてました。	3	0	0	1	0	0	0	0	0	0		0	6	7	5	5	4	1	4	2	3	2	2	2	2	1	1	3	3	4	2	4	4	2	4	4	4	2	4	2	4	1	1	4
195	0	0	24	5	交際相手との遠距離恋愛	3	0	0	1	0	0	0	0	0	0		0	6	6	4	4	3	4	3	2	1	4	4	2	2	3	2	4	4	3	3	3	4	2	2	3	4	3	4	4	3	2	2	3
401	0	0	33	5	人間関係	3	0	0	1	0	0	0	0	0	0		0	7	7	6	7	4	4	4	2	3	4	4	3	2	4	3	4	4	4	3	1	4	3	3	4	4	5	3	3	3	1	2	3
488	0	0	23	5	仕事が忙しくてパートナーとのコミュニケーションを取る時間が最近かなり少ない状態で、一緒にご飯を食べるのも月に数日しかなく二人で丸一日遊びに出かけたのも数ヶ月前という状態です。	3	0	0	1	0	0	0	0	0	0		0	7	7	5	2	2	2	4	3	5	1	1	1	4	1	1	4	5	4	2	1	3	1	1	4	3	5	5	5	4	1	1	4
85	0	0	33	6	彼女と別れて昔から好きな人にアプローチするかどうか	3	0	0	1	0	0	0	0	0	0		0	6	3	3	2	2	2	4	2	4	2	3	2	4	1	4	5	2	4	4	2	2	2	2	4	4	4	4	4	2	2	2	4
388	0	1	29	6	恋人関係	3	0	0	1	0	0	0	0	0	0		0	5	5	3	3	3	4	4	2	4	2	1	2	2	1	1	1	3	1	4	1	5	1	1	4	4	5	5	5	3	1	1	4
78	0	0	21	4	通学時間が長いこと	4	0	0	0	1	0	0	0	0	0		0	6	4	5	2	3	3	4	3	4	3	4	3	4	2	3	4	4	3	3	3	2	4	3	3	1	3	2	3	2	4	3	2
4	0	0	45	5	司法書士試験受験を数回して失敗しているので、今年合格できるかどうか不安で精神的なストレスを抱えています。	4	0	0	0	1	0	0	0	0	0		0	7	5	6	3	3	4	4	3	4	3	2	2	4	2	3	4	5	4	4	3	4	2	2	4	4	3	4	4	2	2	2	3
300	0	0	22	6	大学の期末試験	4	0	0	0	1	0	0	0	0	0		0	5	3	5	5	5	4	3	3	4	3	4	3	4	3	3	4	4	3	4	2	4	2	3	4	4	4	4	3	3	2	2	3
284	0	0	38	8	苦闘の論文を乗り越え、ようやく迎えた通信制大学の卒業式が、新型コロナウィルスによって中止になってしまったショック。	4	0	0	0	1	0	0	0	0	0		1	6	6	1	2	3	5	5	2	4	3	4	2	5	4	3	5	5	3	4	2	4	1	1	5	4	4	5	5	2	4	3	2
273	0	0	48	1	難病指定であるパーキンソン病患者ですが、その１つの症状でもある手のふるえが激しく、何をするにしても、１つの事になかなか集中できない。	5	0	0	0	0	1	0	0	0	0		0	7	6	4	1	2	3	3	3	3	3	3	2	3	2	4	3	3	4	2	2	2	1	2	2	1	4	5	4	1	4	4	1
415	0	0	48	1	体力低下	5	0	0	0	0	1	0	0	0	0		0	7	7	5	1	1	4	5	2	3	3	5	1	5	3	4	5	5	5	1	2	4	1	4	5	2	4	5	2	1	4	4	1
82	0	0	46	1	新型コロナウイルスに関するストレス	5	0	0	0	0	1	0	0	0	0		1	6	6	4	2	2	3	3	2	2	2	3	3	2	2	2	3	3	3	3	3	3	4	4	3	2	3	2	2	2	4	4	4
8	0	1	39	2	自分の健康状態	5	0	0	0	0	1	0	0	0	0		0	5	5	3	1	2	2	4	1	3	5	5	1	4	3	4	4	5	4	3	2	4	1	1	4	3	4	5	5	2	4	4	1
318	0	1	42	2	長年の持病を抱えたうえでの慢性的な家族との不和	5	0	0	0	0	1	0	0	0	0		0	5	5	4	5	5	4	3	1	3	3	2	1	4	1	3	3	5	3	2	1	3	2	2	4	1	5	4	4	2	3	2	1
356	0	1	48	2	偏頭痛で度々寝込んだこと	5	0	0	0	0	1	0	0	0	0		0	7	7	1	5	5	2	2	3	3	4	3	1	1	1	1	1	1	2	3	3	3	3	2	4	2	3	3	4	1	4	3	3
400	0	0	45	2	喉の痛み。喉を食べ物が通るたびに苦痛が伴うので、食事を楽しめない。	5	0	0	0	0	1	0	0	0	0		0	7	7	2	1	3	4	3	3	1	3	5	1	3	1	2	2	5	3	2	3	2	3	2	3	2	3	3	4	2	4	4	2
6	0	0	43	2	新コロナの問題で日本もヨーロッパのようにどんどん感染して大量に死んでいったりするかもしれないと思うとすごいストレスです。	5	0	0	0	0	1	0	0	0	0		1	7	7	1	2	2	3	2	2	1	1	2	2	3	2	2	1	1	2	3	2	3	2	1	3	3	4	4	5	2	3	2	3
124	0	0	30	2	2カ月くらい前からコロナウイルスの蔓延により、自分も感染するかもしれないという恐怖を感じながら生活するようになったこと	5	0	0	0	0	1	0	0	0	0		1	6	7	2	1	3	2	4	3	4	4	3	3	4	2	3	3	4	4	4	2	4	2	2	4	2	4	4	4	3	4	2	3
232	0	1	51	2	風邪の症状があり、新型コロナに感染したかもしれないと思った時、他の人に迷惑を掛けてしまうのではないかと思い心配でした。	5	0	0	0	0	1	0	0	0	0		1	6	7	6	4	5	4	3	3	2	4	4	2	3	2	3	2	4	3	3	3	4	2	2	3	2	3	4	4	3	2	2	3
397	0	0	39	2	コロナウイルス	5	0	0	0	0	1	0	0	0	0		1	5	5	3	3	3	2	3	2	3	2	3	2	3	2	2	2	3	3	2	3	3	3	3	3	3	3	3	3	2	3	3	2
434	0	0	53	2	アレルギー性鼻炎が悪化して、1か月間苦しい思いをしたことです。	5	0	0	0	0	1	0	0	0	0		1	7	7	1	1	1	1	1	1	2	1	1	1	1	1	1	1	1	1	1	5	4	4	3	3	1	1	2	3	1	4	4	1
37	0	0	20	3	場面緘黙症ではないかと言われ、精神科に通院していること。	5	0	0	0	0	1	0	0	0	0		0	6	6	3	2	2	2	5	4	2	2	2	3	3	1	2	2	3	2	2	4	3	4	4	3	3	2	2	2	2	4	1	4
55	0	0	38	3	アトピーの肌荒れ(特に手、顔)。季節的に乾燥しやすいので、強いかゆみがでることがストレス。	5	0	0	0	0	1	0	0	0	0		0	6	7	1	5	2	4	1	4	3	2	2	2	4	1	3	4	2	2	2	3	4	2	2	4	2	3	4	4	3	2	3	3
98	0	1	36	3	歯が痛くなり歯医者に行ったら抜髄することになったこと	5	0	0	0	0	1	0	0	0	0		0	6	6	5	4	4	2	2	2	3	2	3	2	3	2	3	3	3	3	2	3	2	4	3	2	2	3	2	3	2	3	3	2
129	0	0	41	3	自宅の前で深夜にたむろする若者がいて、なかなかうまくねむれなかった。	5	0	0	0	0	1	0	0	0	0		0	7	7	1	1	1	2	2	1	1	1	2	1	3	1	2	4	3	2	5	2	5	1	1	4	4	4	5	5	1	3	3	2
148	0	0	36	3	親知らずを短期間で2本抜歯したこと	5	0	0	0	0	1	0	0	0	0		0	6	4	3	5	4	4	3	2	4	3	3	2	2	1	1	2	4	3	1	4	2	3	3	2	1	2	3	3	2	4	4	2
169	0	1	46	3	以前から右の奥歯や舌の違和感がひどく、その症状が悪化してきてる点。ずっと前から歯科や口腔外科に相談しているが、全く症状が改善しないことがストレスになりました。	5	0	0	0	0	1	0	0	0	0		0	6	6	3	2	4	4	3	3	2	3	4	3	4	2	3	2	3	3	4	3	4	3	3	4	4	3	3	3	2	1	2	3
216	0	0	35	3	慢性的な首コリです。	5	0	0	0	0	1	0	0	0	0		0	7	7	6	2	2	3	3	2	3	3	2	3	4	3	3	3	4	3	3	3	3	2	3	4	1	3	4	3	1	4	4	1
270	0	0	44	3	卵サンドを作ろうとゆで卵の皮むきをしていた時、ゴミ箱の所で腰をかがめ起き上がろうとしたら、私の脇辺りの腰がゴキ！！って痛めてしまい思うように動けなくなってしまった。	5	0	0	0	0	1	0	0	0	0		0	6	6	5	5	5	2	3	5	4	2	2	2	4	2	2	1	2	4	2	2	4	1	2	2	3	4	5	4	1	3	2	3
67	0	0	44	3	体のとある部分に小さな良性の腫瘍が見つかり、定期的に病院に行って検査を受けなければならなくなりました。コロナウイルスが流行っているというご時勢もあり、なるべく病院には行きたくないのですが、どうしても検査で行かなくてはならず、凄くストレスを感じています。	5	0	0	0	0	1	0	0	0	0		1	7	7	5	4	3	4	3	4	4	4	1	3	4	1	1	3	5	1	1	4	4	2	4	5	4	2	4	2	2	3	1	3
90	0	1	34	3	コロナウィルスのせいで外出があまりできなくなった	5	0	0	0	0	1	0	0	0	0		1	6	7	3	3	3	4	4	3	2	2	2	3	3	2	3	4	3	3	2	2	4	2	2	4	4	4	4	4	4	1	1	4
265	0	0	39	3	ここ最近の最も大きなストレスの要因はコロナウイルスによる騒動とそれによる外出不可能に近い状況です。	5	0	0	0	0	1	0	0	0	0		1	7	7	2	1	1	4	3	1	4	5	5	2	4	3	2	3	4	4	1	4	3	2	2	3	4	2	4	4	3	2	3	3
275	0	0	34	3	新型コロナウイルス	5	0	0	0	0	1	0	0	0	0		1	6	6	2	3	4	4	5	4	4	5	5	3	4	2	1	3	5	4	4	2	4	2	2	4	4	4	4	4	2	4	2	3
357	0	1	37	3	新型コロナウイルスに自分や家族が感染してしまうのではないかという不安	5	0	0	0	0	1	0	0	0	0		1	6	6	3	2	2	4	2	4	2	2	2	2	2	1	1	2	4	2	4	2	4	2	2	4	3	4	4	4	3	2	1	3
360	0	0	38	3	3ヶ月を振り返って特にストレスが溜まっている事は、新型コロナウィルスです。いつ終息するのか分からず、ずっと不安を抱えたまま生活しており、早く解決してほしいです。外出時は細心の注意を払って行動していますが、いつ自分が感染するか分からないのでやはり怖いです。 仕事上のストレスもありますが、今は新型コロナウィルスが一番のストレスになっています。	5	0	0	0	0	1	0	0	0	0		1	6	7	6	4	4	2	2	2	3	1	1	1	2	1	2	2	2	2	3	2	4	2	2	3	3	4	4	4	3	1	1	3
367	0	0	43	3	コロナウイルスの影響で休日もまったくどこにも行けない事。	5	0	0	0	0	1	0	0	0	0		1	6	5	1	1	1	2	4	3	2	2	4	2	3	1	2	2	4	4	2	4	3	4	4	3	2	2	2	2	2	3	3	2
473	0	1	38	3	コロナウイルスの影響で、旅行に行くつもりだったのが行けなくなってしまった	5	0	0	0	0	1	0	0	0	0		1	5	6	3	4	2	3	4	3	4	2	2	2	4	2	4	4	4	4	2	4	1	4	4	3	2	2	2	2	2	3	2	2
484	0	0	60	3	新型コロナウイルスの世界的感染で日常生活が不安であること。 連日不安を煽る様な報道がテレビや新聞等で流されるので精神的に答える。 またマスクやアルコール除菌剤も手に入らない。	5	0	0	0	0	1	0	0	0	0		1	6	6	1	1	2	2	3	3	2	2	3	2	3	2	2	3	4	4	2	4	3	3	4	2	2	2	3	2	2	3	2	3
9	0	0	27	4	足の骨折をしたことで、普段通りに歩けなくなってしまった期間が長く続いたことは、とてもストレスに感じました。	5	0	0	0	0	1	0	0	0	0		0	7	6	3	5	5	4	5	2	4	2	2	2	3	1	4	1	4	4	2	2	3	4	4	5	2	4	2	2	2	4	2	3
27	0	1	43	4	アレルギー反応で痒みが出たこと	5	0	0	0	0	1	0	0	0	0		0	6	6	5	5	5	2	2	3	2	2	2	3	2	3	2	2	2	2	2	1	4	1	2	4	4	5	5	4	4	1	1	4
69	0	0	33	4	2月にぎっくり腰になり、しばらくまともに動けなかったです。	5	0	0	0	0	1	0	0	0	0		0	6	6	3	3	3	2	2	3	2	2	2	3	2	1	2	2	3	2	3	2	3	2	2	3	2	4	4	4	2	3	2	3
88	0	1	35	4	喉の痛み	5	0	0	0	0	1	0	0	0	0		0	6	6	4	3	4	3	3	4	3	3	3	3	3	1	1	1	2	2	4	2	3	2	3	4	3	4	4	3	4	2	3	3
104	0	0	34	4	原因不明のリンパ節の腫れがおきて、未だに原因不明で経過観察となっている事です	5	0	0	0	0	1	0	0	0	0		0	4	5	4	3	3	2	4	2	2	3	3	3	4	4	3	3	2	3	2	3	3	4	4	2	3	3	2	2	3	2	2	2
161	0	1	52	4	昨年末から体調不良が続いていること	5	0	0	0	0	1	0	0	0	0		0	5	6	4	3	3	3	3	3	2	4	3	3	2	2	2	2	3	2	3	3	3	2	3	4	2	3	4	3	3	3	2	2
184	0	0	55	4	病院で検査するばかりで持病の症状を改善できないままの状態が続いている。	5	0	0	0	0	1	0	0	0	0		0	7	7	4	2	2	5	4	4	3	4	4	3	4	3	2	3	5	4	2	3	4	3	2	3	3	3	3	4	2	3	3	2
249	0	1	48	4	病気	5	0	0	0	0	1	0	0	0	0		0	5	5	5	4	5	4	4	2	2	2	2	4	2	1	1	1	5	1	5	4	3	1	2	4	2	2	5	4	2	3	3	3
285	0	0	36	4	親知らずの虫歯	5	0	0	0	0	1	0	0	0	0		0	6	6	6	6	5	4	3	3	3	3	2	3	2	2	3	3	4	4	3	3	3	2	3	4	2	3	4	3	3	2	1	3
297	0	0	45	4	健康診断で再検査になったこと。	5	0	0	0	0	1	0	0	0	0		0	7	7	6	2	3	3	4	2	2	2	3	2	2	2	2	2	3	2	4	1	4	2	2	4	3	5	4	4	3	2	2	4
298	0	0	29	4	アトピー性皮膚炎による肌の乾燥	5	0	0	0	0	1	0	0	0	0		0	6	6	2	2	3	4	4	3	3	3	2	3	4	3	3	3	4	4	3	2	4	2	2	3	4	4	4	4	3	3	3	2
377	0	0	54	4	不整脈が再発して非常に大きいストレスを感じた。本当はストレスは不整脈には良くないのだが。	5	0	0	0	0	1	0	0	0	0		0	7	7	2	5	3	1	4	3	1	1	1	4	4	1	1	1	1	1	4	1	5	1	2	4	4	5	5	4	2	1	1	3
58	0	0	73	4	新型コロナウイルス感染症が私の街の近くで発症しました。この影響で日常生活に大きな制約がかかり、精神的に大きな負担になっています。	5	0	0	0	0	1	0	0	0	0		1	7	7	1	5	4	3	4	4	2	3	2	3	4	2	2	1	3	3	3	1	4	1	1	4	4	5	5	5	3	1	1	2
65	0	0	37	4	家族が熱を出してしまい数日たっても下がらなかったので、コロナウイルスではないかと心配した。	5	0	0	0	0	1	0	0	0	0		1	5	7	2	4	3	4	3	3	4	4	5	2	4	1	2	3	5	4	2	2	3	2	2	3	3	4	4	4	3	4	2	4
130	0	0	51	4	持病のパニック障害がコロナ騒動で少し悪化した	5	0	0	0	0	1	0	0	0	0		1	6	6	3	2	4	4	3	1	2	3	2	1	5	3	4	4	4	5	3	2	4	1	1	4	4	4	5	5	1	4	3	2
371	0	1	38	4	コロナウイルスの影響により、普段どおりの生活ができないことへの不安と不満	5	0	0	0	0	1	0	0	0	0		1	4	6	1	1	1	3	4	4	3	4	4	4	4	3	4	4	4	4	2	4	2	4	4	3	4	2	2	2	3	3	3	3
387	0	0	44	4	コロナウイルスによる自粛やマスク不足	5	0	0	0	0	1	0	0	0	0		1	5	6	2	3	3	4	5	3	2	4	3	2	4	1	2	2	4	5	3	2	4	2	2	4	4	4	4	4	3	1	1	4
425	0	0	38	4	コロナウイルスが大流行していることにより通勤などで満員のバスに乗車するのがとてもストレスである。マスクをせずに咳をする人が隣や前にいるととてもイライラしてしまう。	5	0	0	0	0	1	0	0	0	0		1	6	5	4	3	2	3	4	2	3	4	4	2	3	2	2	3	3	3	3	3	3	3	2	3	3	3	3	4	2	2	2	3
22	0	1	28	5	牡蠣を食べてノロウイルスになったこと。	5	0	0	0	0	1	0	0	0	0		0	7	6	5	6	5	3	3	1	4	3	4	2	3	2	3	3	3	3	2	3	3	2	2	3	3	3	4	4	3	2	1	4
34	0	0	26	5	皮膚炎によって長期間に渡りかゆみ、痛みが生じていたこと	5	0	0	0	0	1	0	0	0	0		0	7	6	2	5	5	1	2	3	1	1	1	2	1	1	1	2	1	1	3	4	2	3	2	5	2	2	3	4	4	2	1	3
75	0	1	30	5	育児による睡眠不足	5	0	0	0	0	1	0	0	0	0		0	7	4	1	2	2	4	4	1	4	2	5	1	2	1	2	2	4	4	4	2	4	1	1	5	5	4	5	5	2	4	2	4
176	0	1	42	5	体調不良で病院に通ったことです	5	0	0	0	0	1	0	0	0	0		0	5	5	5	4	4	3	2	3	2	2	2	2	3	2	2	2	2	3	2	2	2	2	2	3	3	4	4	4	3	2	2	3
247	0	1	37	5	ギックリ腰になったのですが、同居家族みんな具合が悪く、酷い腰痛を抱えたま家事も買い出しもしなくてはいけませんでした。無理したせいか、完治するまで2週間以上かかり、その期間は非常にストレスを感じました。	5	0	0	0	0	1	0	0	0	0		0	7	6	5	4	4	3	4	3	2	5	2	2	2	1	2	1	3	3	4	1	5	1	1	3	4	5	5	5	3	1	2	4
14	0	0	48	5	仕事や外出時に、コロナウイルスの感染防止対策にストレスを感じました。	5	0	0	0	0	1	0	0	0	0		1	7	7	7	4	5	4	3	3	3	2	2	3	3	2	2	1	2	3	4	2	4	2	2	2	3	4	4	4	3	2	2	3
134	0	0	52	5	コロナウイルスのリスクがあるが満員電車にのること	5	0	0	0	0	1	0	0	0	0		1	6	6	2	1	1	2	4	2	3	3	2	2	2	2	3	3	3	2	4	4	3	4	4	4	3	2	2	2	3	2	2	2
135	0	1	57	5	コロナウィルスの出現	5	0	0	0	0	1	0	0	0	0		1	5	5	1	4	4	2	3	2	3	3	3	3	4	3	3	3	3	3	3	4	3	3	4	3	3	2	3	2	3	2	2	3
177	0	1	81	5	コロナウィルス	5	0	0	0	0	1	0	0	0	0		1	7	7	2	3	3	3	4	4	3	4	3	2	2	3	2	2	3	2	3	2	4	2	2	4	3	4	4	4	3	2	2	1
291	0	1	44	5	新型コロナウイルスで日常生活に支障をきたしていることです。	5	0	0	0	0	1	0	0	0	0		1	6	7	2	4	4	5	3	3	2	2	3	3	2	2	3	2	5	4	3	2	3	2	2	3	4	4	4	4	2	2	2	4
344	0	0	49	5	新型コロナの影響で外出時にマスクをしたりしなければ周りの目が気になったり、買い占めでなかなか必要なものが買えなかったりしたこと。	5	0	0	0	0	1	0	0	0	0		1	5	6	3	3	4	4	3	3	2	2	2	3	2	2	1	1	2	2	3	3	4	2	2	2	3	3	4	4	3	1	1	4
435	0	0	22	5	新型ウイルスによる健康の心配	5	0	0	0	0	1	0	0	0	0		1	7	7	1	4	4	3	4	2	3	4	4	3	4	2	2	3	4	4	4	2	2	2	2	4	5	4	4	4	2	3	3	2
54	0	0	48	6	現在逆流性食道炎で食事をすると胃もたれと食道の痛みや苦しさでとても辛いです。	5	0	0	0	0	1	0	0	0	0		0	6	7	1	1	3	2	4	4	2	3	2	3	2	1	2	2	4	4	2	3	4	2	3	2	4	3	4	3	3	3	2	3
103	0	0	53	6	最近、寒暖差が激しせいか自律神経が乱れて思うように寝ることができません。 よって、身体が怠い、頭が重いなどといった症状などが、ストレスになっていました。	5	0	0	0	0	1	0	0	0	0		0	6	6	4	5	5	3	4	3	4	4	5	2	4	3	4	4	5	4	3	3	3	2	3	3	4	3	4	3	2	3	2	3
162	0	1	39	6	突然肩が痛く腕が上がらなくなった。	5	0	0	0	0	1	0	0	0	0		0	7	6	3	2	5	4	3	2	2	3	4	3	4	2	2	2	3	2	4	2	4	2	2	4	4	4	4	4	3	3	2	3
208	0	0	44	6	近所のマンション工事	5	0	0	0	0	1	0	0	0	0		0	5	5	2	4	4	3	3	3	3	2	3	3	3	3	4	3	4	3	3	3	3	3	3	3	3	3	3	3	2	3	2	2
271	0	0	41	6	読書やテレビ鑑賞であまり集中力が続かないこと	5	0	0	0	0	1	0	0	0	0		0	4	5	3	2	2	5	5	3	5	4	5	3	5	4	5	5	5	5	2	3	3	3	3	3	3	3	3	3	3	3	3	3
277	0	1	26	6	体の不調がストレスです。足のむくみや、虫歯、目の充血です。	5	0	0	0	0	1	0	0	0	0		0	6	6	5	3	3	3	2	1	3	4	2	2	2	2	4	5	3	2	4	2	4	2	2	4	5	4	4	4	3	1	1	3
338	0	1	32	6	ダイエットを開始したのにも関わらず、体重が減るどころか逆に2kgも増えてしまった事です。	5	0	0	0	0	1	0	0	0	0		0	7	6	5	3	3	2	4	4	3	2	2	4	4	2	2	4	2	4	4	2	4	2	1	4	4	4	4	5	3	3	1	3
383	0	0	45	6	体調があまり良くなくて集中力に欠けていた期間があった	5	0	0	0	0	1	0	0	0	0		0	6	6	6	5	5	4	4	2	2	3	4	2	3	2	2	3	4	3	3	2	4	2	2	3	3	4	4	4	3	2	1	3
418	0	1	40	6	腹痛があった	5	0	0	0	0	1	0	0	0	0		0	6	6	4	5	5	4	4	3	1	2	2	3	3	1	1	1	4	2	2	3	4	2	2	3	4	3	4	4	3	2	2	3
15	0	1	39	6	コロナの不安	5	0	0	0	0	1	0	0	0	0		1	5	6	5	4	4	3	4	3	3	3	2	3	2	3	3	2	3	3	3	3	3	3	3	3	3	3	3	3	3	4	2	3
86	0	1	76	6	コロナウイルスの感染拡大で、娘の住んでいる国で日本より感染拡大が進んだのが心配で、現在も同じ状況です。	5	0	0	0	0	1	0	0	0	0		1	7	7	2	2	2	4	3	3	3	3	4	3	3	2	3	3	3	4	4	2	4	2	2	4	4	4	4	4	3	1	2	3
137	0	1	52	6	コロナウイルスが、原因でマスクを買えない	5	0	0	0	0	1	0	0	0	0		1	7	7	1	1	3	2	2	3	3	2	2	3	3	2	3	2	3	2	2	2	4	2	2	2	3	4	4	4	2	4	2	4
138	0	1	44	6	新型コロナウイルス問題の日常生活への影響がストレスになっている。 食品や日用品、衛生用品などが手に入りにくいこと、不要不急の外出を控える必要があること、家族の健康の心配など。	5	0	0	0	0	1	0	0	0	0		1	5	7	6	5	5	3	4	2	3	3	2	2	3	1	2	2	4	2	4	2	4	2	2	3	3	4	4	4	3	2	1	4
146	0	1	51	6	娘の受験やコロナウィルスによる卒業式の有無	5	0	0	0	0	1	0	0	0	0		1	7	6	6	7	4	3	4	3	3	4	4	3	3	4	4	4	4	4	3	2	4	2	2	4	4	4	4	4	3	2	2	3
150	0	0	27	6	コロナウイルスで外出が出来ないこと	5	0	0	0	0	1	0	0	0	0		1	5	6	2	2	2	2	4	2	4	4	4	2	3	2	4	5	2	4	3	2	1	5	4	5	1	4	1	2	3	4	4	3
172	0	0	37	6	新型コロナウイルスについて	5	0	0	0	0	1	0	0	0	0		1	6	5	4	3	3	3	2	3	4	3	3	3	3	2	3	4	3	4	3	4	2	2	2	3	2	2	4	4	3	3	2	2
328	0	0	40	6	新型コロナウイルス	5	0	0	0	0	1	0	0	0	0		1	7	7	1	2	3	3	3	3	4	3	3	3	4	3	3	2	3	3	3	3	3	3	3	4	3	3	3	3	3	2	2	2
393	0	0	30	6	風邪をひいて熱が出たことで時期的にコロナを疑いストレスがかかった。	5	0	0	0	0	1	0	0	0	0		1	6	6	4	6	5	2	1	3	2	2	2	2	2	1	2	2	2	2	2	3	3	3	3	3	3	3	3	3	3	2	3	3
430	0	1	55	6	新型コロナウイルスの蔓延	5	0	0	0	0	1	0	0	0	0		1	6	6	3	4	4	3	3	2	3	2	2	2	2	1	2	2	3	2	4	2	4	2	2	4	4	4	4	4	3	2	2	3
438	0	1	42	7	ホルモンバランスが乱れ、ほぼ毎日と言っても過言ではないほど体調が悪いこと。	5	0	0	0	0	1	0	0	0	0		0	6	7	4	1	1	3	3	3	2	4	3	2	3	2	4	2	3	2	3	2	4	2	2	4	3	4	4	4	3	2	2	3
455	0	0	45	7	禁煙に伴う禁断症状・離脱症状。	5	0	0	0	0	1	0	0	0	0		0	7	4	5	5	6	4	4	4	4	5	4	4	4	2	3	4	4	4	3	3	4	2	3	3	3	3	4	3	3	1	1	4
116	0	0	30	7	新型コロナウイルスの感染拡大に伴って、様々なイベントや活動が自粛させられたり、毎日同じような感染に関するニュースばかりを見たり聞いたりしなければならないこと。新型コロナウイルスの発生がストレス。	5	0	0	0	0	1	0	0	0	0		1	6	6	2	2	1	3	4	3	4	4	4	3	4	2	2	4	4	4	3	3	3	3	3	4	3	3	3	3	3	1	1	4
289	0	0	37	7	コロナに関するニュース	5	0	0	0	0	1	0	0	0	0		1	5	5	3	3	3	3	4	3	2	3	3	2	3	2	3	4	4	3	3	3	3	3	3	3	3	3	3	3	2	3	3	2
292	0	0	40	7	新型コロナウィルスの感染拡大です。	5	0	0	0	0	1	0	0	0	0		1	5	5	2	3	4	3	3	2	2	3	2	2	3	2	2	2	2	2	3	2	4	2	3	2	3	4	4	3	3	2	2	3
429	0	1	39	7	新型コロナウィルスが得体が知れず不安だ	5	0	0	0	0	1	0	0	0	0		1	5	6	4	3	3	3	3	2	2	3	2	2	3	2	2	2	3	2	2	2	2	2	3	4	3	4	4	3	3	1	1	3
495	0	1	39	7	新型コロナウィルスへの不安。	5	0	0	0	0	1	0	0	0	0		1	7	7	6	1	1	2	1	1	1	1	1	1	1	1	1	1	1	1	3	3	1	3	3	1	1	3	3	3	3	4	3	1
80	0	1	57	8	次女の持病が悪化したため、病院通いや看病などがストレスの大きな要因となった	5	0	0	0	0	1	0	0	0	0		0	6	7	6	3	3	2	2	3	1	4	3	2	1	1	1	1	2	4	2	3	4	3	2	4	3	3	3	4	3	2	2	2
94	0	1	28	8	ワンオペでの育児	5	0	0	0	0	1	0	0	0	0		0	7	6	4	6	6	4	5	3	2	1	1	3	3	1	1	1	1	1	2	2	5	1	5	5	5	4	5	1	3	1	1	4
186	0	0	32	8	気圧が変わることでめまいがすること	5	0	0	0	0	1	0	0	0	0		0	7	7	1	1	1	4	1	2	1	1	1	1	1	1	1	1	1	1	2	1	4	2	2	4	4	5	4	4	3	2	2	3
323	0	0	40	8	過敏性腸症候群になったこと	5	0	0	0	0	1	0	0	0	0		0	6	6	3	5	5	3	3	3	2	2	2	2	2	2	2	2	3	2	4	3	4	2	2	4	4	3	4	4	3	2	2	3
191	0	1	34	8	コロナウィルスのせいで予定していたものが全部キャンセルになった	5	0	0	0	0	1	0	0	0	0		1	7	7	1	1	1	4	3	3	3	3	4	4	3	4	3	3	4	4	4	2	4	2	2	4	4	4	4	4	1	1	1	4
244	0	0	43	8	コロナ関連で必要な物が購入できないので、非常にストレスを感じています。	5	0	0	0	0	1	0	0	0	0		1	7	7	1	1	1	3	4	4	4	4	4	3	2	3	4	2	4	3	3	2	4	2	2	4	3	4	4	4	2	4	4	1
5	0	1	54	1	母親が肺炎で入院して毎日仕事帰りに病院に寄り、帰ると慌てて夕飯の支度など時間に追われた事や入院費用などの工面などに悩んだこと	6	0	0	0	0	0	1	0	0	0		0	6	5	4	4	3	1	4	1	1	1	3	1	5	4	2	5	4	3	3	2	3	3	1	3	2	4	3	5	3	1	2	2
56	0	0	34	1	給料を口座から引き出した日に財布を落としてしまい、人生で初めてキャッシングしてしまったこと。	6	0	0	0	0	0	1	0	0	0		0	7	7	4	6	1	3	4	3	3	3	3	2	3	1	4	4	3	5	2	3	3	2	3	4	1	3	4	3	1	3	3	1
144	0	0	25	1	お金がなく、働いても働いても貯まらない	6	0	0	0	0	0	1	0	0	0		0	7	7	6	2	2	1	1	4	1	1	1	3	1	1	4	5	1	1	4	1	5	1	2	4	4	5	5	4	2	3	4	1
238	0	0	45	1	現在失業中でお金が減っていくこと	6	0	0	0	0	0	1	0	0	0		0	4	7	4	1	4	3	4	3	4	3	3	1	4	1	4	3	4	3	3	1	3	1	1	3	3	5	5	5	1	4	4	1
483	0	0	18	1	コロナウイルスが広がるまでカナダで留学していたのですが、去年のクリスマスのあたりで、カナダの他の地域に旅行に行き、Airbnbを使用したが、到着した時はクリスマスイブの夜だったので、今日は受け付けてられないといわれ、その次の日にAirbnbのカスタマーセンターに連絡して返金してもらえることが決まったが、お金が口座に振り込まれるまで、数日かかり手持のお金がほとんどなくらり、日本からお金をカナダの口座に送るのもクリスマスで時間がかかって、どこで過ごすなどのことを心配しながら1日だけホームレスのように外で過ごした。	6	0	0	0	0	0	1	0	0	0		0	7	7	5	3	3	5	4	3	5	3	4	2	4	1	4	4	4	4	4	2	4	1	1	4	4	4	5	5	3	3	1	3
414	0	0	54	1	コロナウィルスの影響で収入がなくなった事	6	0	0	0	0	0	1	0	0	0		1	7	7	1	1	1	5	5	3	2	4	3	2	3	2	1	3	3	2	3	1	4	2	4	4	4	5	4	2	3	3	3	3
460	0	1	50	1	新型コロナの影響で出社規制が掛かり、作業時間が減るため、収入減になる	6	0	0	0	0	0	1	0	0	0		1	4	5	3	1	1	5	5	4	2	5	5	5	5	5	2	5	5	5	2	2	2	2	2	3	2	4	4	4	3	3	2	3
19	0	0	35	2	家族がリストラになり、再就職がなかなか決まらずに金銭面での援助を求められた。	6	0	0	0	0	0	1	0	0	0		0	7	6	3	5	4	3	5	4	3	4	2	3	5	2	2	4	5	4	2	4	2	4	4	2	2	2	2	2	2	3	3	2
72	0	0	28	2	いろいろなことに挑戦していきたいが資金がなく、それを家族に伝えてもわかってもらえずただ罵られたこと	6	0	0	0	0	0	1	0	0	0		0	7	5	5	2	3	5	4	2	4	4	2	2	4	4	4	4	4	4	2	1	5	4	1	4	2	5	2	5	3	2	2	2
100	0	1	40	2	株式市場の暴落により資産が目減りしたこと。	6	0	0	0	0	0	1	0	0	0		0	7	7	7	1	1	2	4	1	3	1	5	1	5	1	2	5	5	5	1	3	3	4	4	5	1	3	2	2	3	4	4	1
142	0	0	34	2	金銭面でのストレス。 貯蓄したいのに全然貯まらないのがストレスです。 (今も継続中)	6	0	0	0	0	0	1	0	0	0		0	7	6	5	3	3	3	4	2	1	5	5	3	4	1	5	5	5	5	3	2	3	2	5	4	3	4	4	1	3	3	1	4
145	0	0	31	2	無職であることをチクチクと家族に言われ、穀潰しのように要らない存在のようにいじめてくること。	6	0	0	0	0	0	1	0	0	0		0	7	7	7	3	5	5	5	1	3	5	3	5	5	1	3	5	5	5	3	3	5	3	2	3	2	3	3	4	2	4	3	1
199	0	1	41	2	お金がなくて家賃の支払いが遅れてしまったこと	6	0	0	0	0	0	1	0	0	0		0	6	6	5	4	4	2	4	3	5	4	4	2	4	3	4	5	4	4	1	3	2	2	3	3	3	3	4	3	2	3	4	2
276	0	0	33	2	支払いが困難になりどうしよう、どうしようと悩み果てストレスを感じた。	6	0	0	0	0	0	1	0	0	0		0	7	6	6	5	4	4	3	4	3	3	4	2	3	3	3	4	3	3	3	4	3	4	3	2	4	2	2	3	2	3	2	3
313	0	1	23	2	人間関係の不安からバイトができなくなり、金銭面の困難が要因です。	6	0	0	0	0	0	1	0	0	0		0	6	6	6	3	2	4	3	2	2	2	4	2	2	2	2	2	4	3	4	3	3	2	2	4	3	3	4	4	2	4	2	3
381	0	1	41	2	旦那が転職したが、売上が上がらずどんどん給料が減らされ生活ができなくなった。私と子どもが実家にお世話になるが、実の母親がそのことを嫌そうにしているのをみると早く実家を出たいが、お金がないためできなく、それに耐えるしかなかった。	6	0	0	0	0	0	1	0	0	0		0	7	7	5	4	4	2	4	3	5	5	5	1	4	1	5	5	3	5	4	2	5	1	3	5	5	4	5	3	3	4	4	3
386	0	0	36	2	収入が少ないことです。そのため食費や趣味、光熱費も節約しなければならず食べたいものが食べられなかったり、暖房も満足につけられず朝晩の寒暖差がつらかったりすることがストレスの要因です。	6	0	0	0	0	0	1	0	0	0		0	7	7	5	4	4	3	3	3	5	5	5	3	3	1	5	5	1	5	4	3	5	2	1	3	4	3	4	5	1	4	4	1
468	0	0	47	2	株価の下落です。	6	0	0	0	0	0	1	0	0	0		0	7	7	6	2	2	3	3	3	4	3	4	3	3	3	4	4	4	4	3	3	4	1	1	3	4	3	5	5	1	4	3	1
77	0	0	59	3	フリーランスで仕事をしているため収入が安定しない。 特にこの2月、3月は収入が大きく落ち込んでいる。	6	0	0	0	0	0	1	0	0	0		0	5	6	4	3	3	2	3	2	3	2	2	2	4	2	2	4	3	3	2	2	3	3	2	3	2	4	3	4	3	3	2	3
112	0	1	27	3	家計をやりくりするための金銭が足りないことに対する不安感	6	0	0	0	0	0	1	0	0	0		0	7	7	7	2	2	5	2	3	1	2	1	1	3	1	1	1	5	1	1	5	1	5	5	5	1	1	1	1	3	4	1	3
185	0	1	33	3	家計に余裕がなくお金のやりくりに困った	6	0	0	0	0	0	1	0	0	0		0	7	7	7	4	4	3	4	3	3	4	3	2	3	3	3	3	4	4	3	3	4	2	3	4	2	3	4	3	3	3	2	3
189	0	0	37	3	携帯の利用料が予想外に高くなってしまったこと	6	0	0	0	0	0	1	0	0	0		0	7	7	5	3	3	1	4	1	4	5	5	1	4	2	5	5	5	5	1	4	4	4	4	4	2	2	2	2	2	4	2	3
223	0	1	28	3	職場都合で仕事を辞めることになり、いまだに就職先が決まらないことです。	6	0	0	0	0	0	1	0	0	0		0	6	5	3	2	4	1	4	3	4	2	3	2	2	2	2	2	4	3	2	4	2	4	3	4	1	2	2	3	2	4	3	1
248	0	0	35	3	妻が出産後大量出血し、入院することとなったのですが、入院中子供の面倒を一人で見ることと、出産・入院にかかる費用について考えるとストレスになっていると感じる。	6	0	0	0	0	0	1	0	0	0		0	5	4	6	5	4	2	3	3	3	1	1	3	2	1	2	1	2	3	2	4	2	3	4	4	3	2	3	2	3	2	2	3
262	0	0	28	3	金銭面での困難	6	0	0	0	0	0	1	0	0	0		0	6	6	3	5	4	2	2	1	3	3	1	2	4	4	4	4	3	4	2	3	3	3	3	2	4	3	3	3	1	4	4	2
287	0	1	27	3	お金の余裕が無く、買いたいものが買えない。	6	0	0	0	0	0	1	0	0	0		0	5	4	5	1	4	2	3	1	1	3	3	1	2	1	3	2	1	2	4	3	4	3	2	3	4	3	3	4	2	3	1	3
359	0	1	43	3	仕事がない	6	0	0	0	0	0	1	0	0	0		0	5	6	5	2	2	1	4	4	2	4	3	4	1	4	3	3	3	4	1	4	2	4	2	4	1	2	2	4	2	3	2	3
363	0	1	41	3	仕事の契約が切れて収入が激減したこと。貯蓄もないため、将来への不安をより強く感じるようになりました。	6	0	0	0	0	0	1	0	0	0		0	6	6	5	2	3	2	3	2	3	3	4	2	4	3	4	4	4	3	2	3	2	3	3	3	2	3	3	3	2	4	3	2
404	0	1	34	3	パソコンが何度も不具合を起こし、結局買い換えることになった。	6	0	0	0	0	0	1	0	0	0		0	6	6	3	4	4	4	2	1	2	2	2	1	2	2	2	2	3	2	2	4	2	2	4	3	1	2	4	2	1	4	3	2
407	0	0	41	3	サービス残業や、サービス休日出勤、サービス早出等です。	6	0	0	0	0	0	1	0	0	0		0	7	6	5	1	2	3	4	3	5	3	3	1	4	5	4	4	4	4	4	4	4	2	3	3	2	2	4	3	2	2	3	2
444	0	1	40	3	去年不支給となり再申請をしていた障害年金が、６ヶ月待った結果再び不支給になったこと。	6	0	0	0	0	0	1	0	0	0		0	7	7	3	1	2	4	4	2	2	3	2	2	2	2	4	4	4	4	5	2	5	1	1	4	4	4	5	5	3	3	2	3
487	0	0	31	3	金欠。 収入が減り中々貯金ができない。	6	0	0	0	0	0	1	0	0	0		0	7	7	5	1	1	3	3	2	3	4	4	2	4	3	4	4	4	3	3	3	4	3	3	3	4	3	3	3	2	2	3	2
165	0	1	40	3	コロナウイルスの影響で約２ヶ月ほど仕事が休みになっていつ再開するか見通しが立たない状態になったこと。それに伴い収入が激減し今までの様な生活が送れず、将来への不安が増えたこと。	6	0	0	0	0	0	1	0	0	0		1	7	7	1	1	1	2	5	2	2	4	5	2	2	3	4	4	5	5	3	3	4	3	4	4	1	3	3	2	1	4	3	2
179	0	1	43	3	新型コロナウィルスで主人の仕事が減り、家にいる時間が長くなった。収入も減るので、主人の機嫌が悪い日もあり気を使うし、かと言って家事や育児を積極的にやってはくれないのでストレスです。	6	0	0	0	0	0	1	0	0	0		1	7	6	6	4	4	3	1	2	2	3	4	1	3	2	3	1	5	3	3	3	5	3	3	3	3	3	3	3	3	2	2	3
230	0	0	26	3	コロナ騒動で給料が減る	6	0	0	0	0	0	1	0	0	0		1	4	3	4	5	4	3	2	3	3	3	3	2	2	2	4	3	4	3	3	4	2	4	2	3	2	2	2	4	3	2	3	2
421	0	0	50	3	コロナショックでの資産の目減り	6	0	0	0	0	0	1	0	0	0		1	6	6	5	2	3	3	4	3	4	2	2	3	2	4	3	2	3	4	3	1	4	2	4	3	4	5	4	2	2	3	2	3
20	0	1	49	4	金銭面。出費がかさんだため。	6	0	0	0	0	0	1	0	0	0		0	7	7	4	4	4	3	3	5	5	5	5	2	5	2	5	5	5	5	3	3	5	3	2	3	3	3	3	4	2	4	3	2
49	0	0	27	4	貯蓄に関することで、アメリカの経済不安のため、積み立てていた預金の評価額が減ってしまった。	6	0	0	0	0	0	1	0	0	0		0	5	7	3	1	1	4	4	2	4	2	2	2	4	1	3	4	4	5	4	2	3	2	3	3	3	4	4	3	3	2	2	3
61	0	0	36	4	毎月の収入や支払等に関する不安	6	0	0	0	0	0	1	0	0	0		0	4	5	6	3	4	3	2	2	3	4	4	1	2	1	1	3	2	2	3	4	3	3	3	5	3	2	3	3	2	3	2	3
63	0	0	40	4	将来的な不安	6	0	0	0	0	0	1	0	0	0		0	6	6	6	2	3	3	4	2	4	4	3	2	4	3	3	4	4	4	3	3	4	2	3	4	3	3	4	3	2	3	1	3
97	0	0	52	4	金銭面での困難が解消しない。	6	0	0	0	0	0	1	0	0	0		0	6	6	6	2	3	4	3	2	4	2	3	2	4	2	3	3	5	4	3	2	4	2	2	3	3	4	4	4	3	3	3	2
133	0	1	52	4	収入が増えないので生活が安定しない	6	0	0	0	0	0	1	0	0	0		0	6	7	7	1	1	1	3	1	3	5	5	1	4	1	3	5	5	5	2	4	3	3	3	3	1	2	3	3	2	4	4	1
152	0	1	46	4	急にいる出費がかさなり、かなりお金を使いました。	6	0	0	0	0	0	1	0	0	0		0	5	5	4	3	3	3	3	4	2	3	4	3	3	3	4	5	3	4	3	2	3	2	2	3	3	4	4	4	1	3	3	2
233	0	0	42	4	パチンコで１日で4万負けたこと	6	0	0	0	0	0	1	0	0	0		0	7	7	3	4	4	5	4	2	3	2	2	2	4	2	4	4	4	4	2	3	4	3	3	2	3	3	3	3	2	2	2	2
260	0	0	56	4	今後の収入面で不安があり、使い道に関して家族との考え方の違いでストレスを感じました。	6	0	0	0	0	0	1	0	0	0		0	6	5	6	3	4	4	4	3	4	4	5	3	4	2	4	3	3	4	3	2	4	2	2	4	3	4	4	4	2	2	2	2
306	0	1	43	4	仕事が休業状態になる日が何日かあって、休業補償は出るのですが満額ではないのでお給料の面でかなりの不安があります。	6	0	0	0	0	0	1	0	0	0		0	6	7	4	2	1	4	4	3	4	2	1	1	2	1	1	2	3	2	3	1	3	1	1	4	4	5	5	5	4	1	1	4
437	0	0	46	4	株価の下落	6	0	0	0	0	0	1	0	0	0		0	5	6	5	3	3	3	2	1	3	2	1	1	2	2	2	2	3	3	3	3	3	2	4	3	3	3	4	2	3	3	2	2
7	0	1	45	4	コロナ感染防止の為３月中仕事が出来ず収入がなかった為、金銭的な不安と今後の不安が大きい事。	6	0	0	0	0	0	1	0	0	0		1	6	6	1	1	1	2	4	4	3	4	4	2	4	1	4	4	4	5	1	5	2	4	5	2	1	1	2	1	2	3	3	2
156	0	0	30	4	コロナウイルスによる所有株の株価下落	6	0	0	0	0	0	1	0	0	0		1	6	6	3	2	2	4	4	2	4	4	4	2	4	2	2	4	4	4	2	2	4	2	2	4	4	4	4	4	3	1	1	4
228	0	0	34	4	新型コロナウイルスの影響により世界的な株安と為替の乱高下を受けて、投資した資産が大きく毀損したこと	6	0	0	0	0	0	1	0	0	0		1	6	7	2	2	3	4	4	2	5	2	1	3	4	1	3	2	4	3	3	1	4	2	2	4	4	5	4	4	3	1	1	4
472	0	1	59	4	コロナウイルスの猛威により、仕事が中断していること	6	0	0	0	0	0	1	0	0	0		1	7	7	2	2	2	2	3	2	2	4	4	2	4	4	4	5	2	4	2	4	2	3	3	4	2	2	3	3	3	1	1	3
16	0	0	39	5	お金を損した	6	0	0	0	0	0	1	0	0	0		0	6	6	5	4	4	3	3	3	3	3	3	3	3	3	3	3	3	3	3	3	3	3	3	3	3	3	3	3	3	3	3	2
153	0	1	48	5	仕事を始めたことです。 慣れない上に長時間働くことがとても しんどかったです。	6	0	0	0	0	0	1	0	0	0		0	7	6	6	3	4	3	3	2	2	4	4	2	2	2	2	2	2	2	2	4	3	2	3	4	3	2	4	3	3	2	2	3
239	0	0	32	5	持っている株の値段が下がったこと	6	0	0	0	0	0	1	0	0	0		0	7	7	7	1	1	1	1	5	1	1	1	1	1	1	1	1	1	1	1	1	1	5	1	1	1	5	1	5	1	4	4	1
242	0	1	32	5	不妊治療が辛いです。身体的にも痛くてつらいし、それ以上に金銭的にパツパツでストレスです。	6	0	0	0	0	0	1	0	0	0		0	7	3	5	4	4	4	3	2	3	4	2	1	3	1	2	2	4	5	2	5	2	5	4	4	2	1	1	2	3	2	1	4
327	0	0	28	5	金銭に関する問題（金欠）	6	0	0	0	0	0	1	0	0	0		0	7	7	5	3	5	4	5	2	4	4	4	2	4	4	4	4	5	4	2	4	4	2	2	5	3	2	4	4	3	2	2	3
396	0	1	30	5	給料日前はいつも生活がギリギリで大変	6	0	0	0	0	0	1	0	0	0		0	5	6	2	3	5	3	4	3	4	4	3	4	3	2	3	4	4	3	3	3	2	3	3	4	3	3	3	3	3	2	1	3
454	0	1	36	5	時間をかけて制作したソフトが予想以上に売れなかったこと	6	0	0	0	0	0	1	0	0	0		0	6	7	5	3	1	2	3	3	4	4	3	2	3	1	3	3	4	3	2	3	3	3	3	4	2	3	3	3	3	2	1	3
462	0	0	55	5	予定していた仕事の失注による、収入源。不足分の貯金を取り崩しました。	6	0	0	0	0	0	1	0	0	0		0	7	7	6	4	5	5	5	1	5	4	5	2	5	2	1	5	5	3	4	2	5	2	4	4	2	4	4	2	4	2	1	3
467	0	0	34	5	会社からの給料が少ない月(出勤日数の関係上)があり、支払い関係に困りました。この月は我慢しなくてはならない事や、不安が募り本当にストレスがたまりました。	6	0	0	0	0	0	1	0	0	0		0	6	6	6	5	4	3	4	3	3	3	4	2	3	3	3	4	3	3	2	2	4	2	2	4	3	4	4	4	3	2	2	3
480	0	0	38	5	金銭面での困難	6	0	0	0	0	0	1	0	0	0		0	6	6	6	5	5	2	2	2	4	2	4	2	2	3	2	4	4	4	3	2	2	3	2	2	2	4	3	4	2	2	3	2
245	0	1	40	6	派遣社員として短時間働いているが、派遣法により3年間しか同じ場所で働けず、もうすぐその3年がやってくる。でも今の職場はやめたくなく、職場の方にもやめてほしくないと言われているけど、会社の方針と派遣法により続けることは不可。やめたくないというストレスを抱えている。また、子育て中ということで、次の職を探すにも、短時間勤務にするかフルタイムにするか、3年しか働けないけど時給が良い派遣社員にするかなど、お金と子育ての両立においてどれが正解かわからず、常に悩んでいる。	6	0	0	0	0	0	1	0	0	0		0	6	5	4	2	2	3	4	2	2	2	2	3	2	2	3	2	3	4	3	2	3	2	1	4	4	4	4	5	4	1	1	4
379	0	1	47	6	パチンコで全く当たらず大負けしたこと	6	0	0	0	0	0	1	0	0	0		0	6	6	5	2	2	2	4	2	4	4	2	2	2	2	2	4	4	4	3	3	4	3	3	3	4	3	3	3	3	2	2	3
382	0	1	19	6	自由に使えるお金が不足している。	6	0	0	0	0	0	1	0	0	0		0	5	5	4	3	4	3	3	2	4	3	3	3	4	2	2	4	2	3	2	4	3	4	4	4	2	2	2	2	3	3	2	3
424	0	1	35	6	今は専業主婦なのでパートで働きたいがなかなか条件の合う働き口が無いこと。 4月から子供の習い事が始まるので月謝のことや自分が自由に使えるお金があまり無いこと、主人に遠慮してしまいなかなか自分の物を買えないこと。	6	0	0	0	0	0	1	0	0	0		0	7	6	6	2	2	4	4	2	3	3	4	1	4	2	3	4	4	4	4	2	4	1	2	4	4	4	5	4	2	3	3	2
194	0	0	42	6	コロナウイルスに起因する株価暴落に巻き込まれて、ＦＸや株の取引で資産の3分の2を持ってかれた。	6	0	0	0	0	0	1	0	0	0		1	6	7	5	1	1	2	3	2	4	3	4	3	3	2	3	4	2	3	2	3	3	3	3	4	3	3	3	3	2	3	4	2
304	0	1	52	6	コロナウイルスの影響でパートが休みになり、収入が減ったこと。 国からの給付金がいつもらえるのかもらえるかどうかわからないこと。	6	0	0	0	0	0	1	0	0	0		1	7	7	1	1	1	5	3	4	3	3	3	3	3	2	2	2	2	2	3	2	3	2	2	2	3	4	4	4	3	2	2	3
36	0	1	34	7	フリーランスで仕事をしているため、収入面において不安定さがあることです。	6	0	0	0	0	0	1	0	0	0		0	6	5	6	5	5	5	5	3	4	4	4	3	4	3	3	4	5	5	3	2	5	2	2	4	4	4	4	4	3	1	1	4
479	0	1	32	7	経済的自由が欲しくて稼ぐために勉強をしたいのですが、 ９ヶ月の子供を見ながらなかなか時間を作ることができず 自己嫌悪に陥りストレスを感じた。	6	0	0	0	0	0	1	0	0	0		0	7	7	7	1	4	1	1	1	3	5	1	1	1	1	5	5	1	1	1	3	4	2	1	5	5	3	4	5	3	3	1	1
53	0	1	48	7	こどもの学費や車検など家計がきつかったことに加えて、コロナの影響で仕事も激減してますます厳しい状況になったこと。また、こどもも家にいてだらだら過ごすことが多くなりお互いストレスがたまってしまっていること。	6	0	0	0	0	0	1	0	0	0		1	6	5	5	4	4	3	3	3	4	3	3	2	3	3	3	4	4	3	4	2	4	2	2	4	3	4	4	4	3	1	1	4
76	0	0	49	8	収入減から来る将来の不安	6	0	0	0	0	0	1	0	0	0		0	7	7	7	1	1	5	3	1	1	1	1	1	4	1	4	3	5	1	3	3	4	2	2	4	4	3	4	4	1	4	3	3
317	0	0	50	8	金銭面での困難	6	0	0	0	0	0	1	0	0	0		0	6	5	6	2	3	3	4	2	2	3	4	2	4	3	4	4	4	4	2	2	4	2	2	4	3	4	4	4	2	3	3	4
282	0	0	40	8	自営業なので、収入が安定しないことです。 景気やコロナウイルスなど、長期的に見通しの立たない要因もあり、不安感からストレスを感じています。	6	0	0	0	0	0	1	0	0	0		1	6	6	5	2	2	2	2	1	5	2	4	2	3	1	2	4	4	2	1	4	2	2	2	4	4	2	4	4	2	4	3	1
406	0	0	36	9	父親が亡くなったのですが生前に500万の借金があり、その事で親戚とかなり揉めて喧嘩になりました。今でもその事を思い出すとイライラし、大きなストレスになっています。	6	0	0	0	0	0	1	0	0	0		0	7	7	6	1	2	5	2	1	3	2	1	1	1	1	1	1	1	1	1	5	4	3	1	5	2	1	3	5	3	2	2	2
427	0	0	21	9	コロナウイルスの影響で給与に大きな影響があった。	6	0	0	0	0	0	1	0	0	0		1	7	7	3	2	3	1	5	4	2	4	1	4	3	1	1	1	5	1	2	2	5	1	1	5	5	4	5	5	4	1	1	4
372	0	0	38	1	前職を失業後フリーランスをしているが、現状収入が不安定かつ少額。	7	0	0	0	0	0	0	1	0	0		0	6	6	5	4	4	2	2	4	3	2	2	3	2	1	2	2	2	2	4	2	4	2	2	4	3	4	4	4	2	4	3	2
417	0	1	35	1	心配している風に見せかけて、探りを入れてくる知人から連絡がくること	7	0	0	0	0	0	0	1	0	0		0	7	7	1	2	2	4	5	3	1	5	4	3	2	3	3	2	2	2	1	4	3	2	2	4	2	2	4	4	3	2	2	4
433	0	0	42	1	仕事が見つからないこと。	7	0	0	0	0	0	0	1	0	0		0	7	6	6	1	1	4	3	4	3	4	2	1	4	1	4	4	2	4	2	2	3	2	2	3	4	4	4	4	2	3	4	1
70	0	1	32	1	コロナによる業務形態の変更が多方面からあり慣れと対応にとても気力労力を使っているところです。	7	0	0	0	0	0	0	1	0	0		1	5	4	3	5	4	4	5	5	4	3	1	2	4	1	1	2	2	4	4	4	2	3	2	4	3	2	3	4	3	2	1	3
476	0	1	29	1	体調が優れない中，新型コロナウイルス感染拡大の状況を鑑みた感染対策としての行動（手洗い，うがい，洗顔，洗髪，帰宅後の触った場所や持ち物の消毒，洗濯，掃除，テレビやネットなどでの情報収集等々）が増え時間も長く取られるようになったことにより今まで通り使える時間が減っている中，同じ納期での仕事が立て込んで，間に合うか，きちんと仕上げられるか際どかったこと。	7	0	0	0	0	0	0	1	0	0		1	6	6	6	5	6	4	2	1	4	3	2	1	4	3	5	4	4	4	5	2	4	1	2	4	4	4	5	4	2	4	2	2
1	0	1	26	2	・仕事 就職先が決まらず、焦りとイラつきで日々ストレスを感じていた。 ・金銭面 仕事が決まらないので、金銭的に大きな不安を抱え、日々の生活のことを考えるとストレスだった。	7	0	0	0	0	0	0	1	0	0		0	6	6	6	4	4	3	3	3	2	2	2	2	2	2	2	2	2	2	3	2	3	2	2	4	4	4	4	4	2	3	2	3
66	0	0	43	2	社会復帰を目指して求職活動をして応募するが不採用になってしまう	7	0	0	0	0	0	0	1	0	0		0	6	6	5	3	3	3	3	2	3	4	3	2	2	2	3	2	3	3	2	3	3	3	3	4	3	3	3	3	2	4	4	1
81	0	1	43	2	収入が減ったことから、今後の生活の質が下がってしまいそうで不安に感じている。	7	0	0	0	0	0	0	1	0	0		0	7	7	4	2	3	3	3	2	3	3	4	2	2	2	4	5	3	5	3	3	4	2	2	3	3	3	4	4	2	4	3	2
126	0	1	35	2	持病などで人とのコミュニケーションが難しく、仕事で支障を出してしまうこと。	7	0	0	0	0	0	0	1	0	0		0	7	7	6	2	6	4	4	2	2	2	4	2	2	2	3	2	4	3	5	4	5	2	4	5	4	2	4	2	2	3	1	4
158	0	0	24	2	仕事上の人間関係	7	0	0	0	0	0	0	1	0	0		0	5	5	5	3	3	2	1	2	1	2	1	1	1	1	1	1	2	2	4	3	4	2	3	2	3	3	4	3	2	3	3	2
171	0	1	55	2	仕事の関係で、２月の末にシンガポールへ行く予定があり、航空チケットを予約していましたが、行きの便がキャンセルになってしまいました。フライトの変更で手間がかかったり、それに伴う他の予定の変更などで、かなりストレスがたまりました。	7	0	0	0	0	0	0	1	0	0		0	6	5	5	6	6	4	2	1	4	2	3	1	2	1	2	3	4	3	4	2	4	1	1	5	5	4	5	5	3	3	4	1
254	0	0	31	2	初めての職場に行くことになり、人見知りで環境に慣れるのにも時間がかかるため初日にものすごく緊張した。	7	0	0	0	0	0	0	1	0	0		0	6	3	6	4	3	5	4	3	4	5	5	3	4	2	4	5	2	4	2	3	4	2	3	4	3	3	4	3	2	3	3	3
256	0	0	31	2	務めている派遣会社の契約が切れたこと	7	0	0	0	0	0	0	1	0	0		0	6	6	5	4	4	2	1	1	1	1	3	1	1	1	4	2	1	3	1	5	1	5	5	4	1	1	1	1	1	4	4	1
272	0	1	38	2	職場の上司のパワハラ	7	0	0	0	0	0	0	1	0	0		0	7	7	3	1	1	4	1	1	1	1	1	1	2	1	2	1	2	1	3	1	4	1	1	5	5	5	5	5	3	2	3	1
303	0	0	41	2	仕事がない	7	0	0	0	0	0	0	1	0	0		0	7	7	3	5	2	4	5	4	5	2	3	2	2	1	4	4	5	4	5	1	5	1	1	4	4	5	5	5	3	3	2	3
362	0	0	39	2	就職面接	7	0	0	0	0	0	0	1	0	0		0	7	5	5	4	4	4	2	4	4	2	2	3	4	1	4	3	4	4	1	4	2	4	4	4	2	2	2	2	2	4	4	2
368	0	0	43	2	寝不足。 不規則の生活で睡眠時間が一定しない為。	7	0	0	0	0	0	0	1	0	0		0	7	7	2	2	2	1	1	1	1	1	1	1	1	1	1	1	1	1	1	3	4	2	2	2	4	3	4	4	2	3	2	3
449	0	1	39	2	就職面接で不合格だったこと。	7	0	0	0	0	0	0	1	0	0		0	7	7	6	1	1	3	3	3	3	2	4	3	3	2	4	3	2	4	2	4	2	3	4	4	1	2	3	2	2	3	3	1
29	0	0	47	2	コロナウイルスで、多くの仕事が中止または延期になりました。自宅でする仕事が激増して、気分転換をたくさんしないといけません。	7	0	0	0	0	0	0	1	0	0		1	5	6	4	5	5	3	3	3	3	3	3	3	3	3	5	3	3	3	2	3	3	3	3	3	1	3	3	3	1	4	4	1
391	0	0	37	2	コロナウィルスの影響で仕事が減っていること。	7	0	0	0	0	0	0	1	0	0		1	6	6	3	3	3	4	3	3	4	4	4	2	4	3	3	3	4	4	3	3	3	3	3	3	4	3	3	3	2	3	3	2
464	0	0	37	2	コロナウィルスが流行してることにより仕事があまりないことがストレスになっています。	7	0	0	0	0	0	0	1	0	0		1	6	6	2	2	2	4	5	5	4	3	4	5	5	2	4	5	5	5	2	4	2	4	4	4	4	2	2	2	3	3	2	3
12	0	0	41	3	仕事が忙しいため、取りたい資格の勉強をしたくてもできなかった。	7	0	0	0	0	0	0	1	0	0		0	6	4	5	1	1	4	4	2	1	4	4	3	4	2	5	4	5	5	3	4	3	2	3	4	2	2	4	3	2	3	3	2
46	0	1	25	3	金銭面	7	0	0	0	0	0	0	1	0	0		0	6	6	6	2	2	2	2	2	5	3	2	2	2	4	4	2	4	2	1	4	3	3	3	3	2	2	3	3	1	4	2	3
51	0	1	47	3	ランサーズで初めて提案をした事。選ばれたい気持ちがありながらも 本当に選ばれてしまった時自分に相手方の要望が満たせるだけのレベルの仕事が出来るだろうかという不安も同時にあった。	7	0	0	0	0	0	0	1	0	0		0	6	1	7	4	1	4	2	3	4	4	4	3	1	1	2	4	4	4	1	4	3	4	4	4	2	2	2	2	3	4	3	3
109	0	0	49	3	仕事上の問題	7	0	0	0	0	0	0	1	0	0		0	6	6	5	3	3	3	2	2	2	2	2	2	2	2	2	2	3	2	3	2	4	2	2	4	3	4	4	4	2	3	2	2
113	0	0	25	3	仕事がうまくいかないとき	7	0	0	0	0	0	0	1	0	0		0	6	4	6	5	5	2	3	2	3	2	1	1	1	2	1	1	2	1	4	2	3	2	3	2	2	4	4	3	3	1	1	4
143	0	0	39	3	仕事のおいて自分の作業量が同僚よりも多く、一人だけ毎日残業をする羽目になり強いストレスを感じた。	7	0	0	0	0	0	0	1	0	0		0	6	6	2	5	5	2	4	2	3	4	4	2	4	3	5	4	4	4	2	4	2	4	4	4	1	2	2	2	2	3	3	2
151	0	0	33	3	仕事上の問題。	7	0	0	0	0	0	0	1	0	0		0	6	4	2	3	1	2	3	4	2	3	2	2	4	1	2	2	4	2	2	3	4	2	3	4	3	3	4	3	3	3	2	3
168	0	1	45	3	会社で上司に目の敵にされて怒られまくったこと	7	0	0	0	0	0	0	1	0	0		0	7	5	4	5	3	3	4	3	4	4	3	2	3	2	3	2	4	4	2	3	4	3	2	2	3	3	3	4	3	3	2	3
170	0	0	49	3	株価急落で損出が出たこと	7	0	0	0	0	0	0	1	0	0		0	6	7	6	4	5	3	4	3	2	4	3	2	4	1	3	3	4	3	2	3	2	3	4	4	3	3	3	2	3	3	3	2
197	0	0	27	3	家庭の無線LANが原因不明の通信不調を起こし、頻繁にwifiが切れてアプリ開発に支障をきたしていたこと	7	0	0	0	0	0	0	1	0	0		0	6	5	2	4	5	3	4	3	4	4	4	2	4	2	3	4	4	4	3	4	3	4	4	2	2	2	2	2	2	4	2	2
203	0	1	32	3	この1ヶ月、仕事が忙しかったこと。	7	0	0	0	0	0	0	1	0	0		0	6	2	6	6	4	4	3	1	3	2	1	1	2	1	4	2	1	1	3	4	3	4	4	2	3	2	2	2	2	4	4	1
226	0	1	45	3	私の一番のストレスは社長です。ワンマンで人の話を聞かず、自分だけが正しいと思っています。マーケティングの結果を全部「なんかそういうの嫌いだから」「俺の勘」で反故にされたりします。	7	0	0	0	0	0	0	1	0	0		0	7	7	5	2	1	3	4	2	1	2	2	2	4	2	2	1	3	2	5	1	5	1	1	5	4	5	5	5	3	1	3	2
227	0	0	60	3	職場の人間関係が最大のストレスです。 ペアで行う仕事の為常に一緒にいますが考え方その他殆どの部分で気が合いません。こちらが年下なので一応折れるようにはしています。	7	0	0	0	0	0	0	1	0	0		0	7	6	2	2	4	4	5	2	3	4	5	2	4	4	2	1	5	4	2	1	4	2	1	4	3	5	4	5	3	2	2	4
234	0	1	26	3	仕事の人間関係のもつれからの退職	7	0	0	0	0	0	0	1	0	0		0	7	7	6	6	2	4	3	3	4	4	3	3	3	4	2	3	3	3	2	3	3	2	2	3	3	3	4	4	2	3	2	2
235	0	0	37	3	職場での人間関係が悪化したこと。	7	0	0	0	0	0	0	1	0	0		0	7	6	5	4	4	2	4	3	4	4	4	4	4	4	4	4	4	4	3	3	4	2	3	4	3	3	4	3	2	3	3	2
241	0	0	26	3	仕事で嫌な上司から全く関係ないことで理不尽に怒鳴られたことが一番大きいストレスでした。	7	0	0	0	0	0	0	1	0	0		0	7	5	1	5	3	4	4	1	2	5	4	2	4	3	4	4	3	5	2	4	2	2	3	4	1	2	4	3	2	3	3	1
243	0	0	46	3	この時世で以前同様の販売ノルマです	7	0	0	0	0	0	0	1	0	0		0	3	4	4	3	4	3	2	2	3	2	2	3	3	3	4	4	3	3	2	2	2	4	3	4	2	4	2	3	2	3	3	2
251	0	0	41	3	私の働いている職場に、新しく中年の女性が採用されたが、とにかく仕事中の私語が多い。	7	0	0	0	0	0	0	1	0	0		0	7	7	1	1	1	3	5	3	2	2	4	3	4	2	2	4	3	4	3	4	3	2	4	4	2	2	4	2	2	4	3	2
307	0	1	39	3	退職。契約時の内容と異なる勤務体系になっていることから日にちを希望し退職をうかがったところ、その日にちよりも早く退職するよう指示された。	7	0	0	0	0	0	0	1	0	0		0	7	7	2	2	4	4	5	3	2	3	4	3	4	2	4	3	5	4	2	1	3	1	1	3	4	5	5	5	2	4	2	4
320	0	0	37	3	オーディションに落ちた	7	0	0	0	0	0	0	1	0	0		0	6	6	2	2	2	1	1	1	2	1	2	2	2	3	3	3	3	3	3	3	3	3	3	4	3	3	3	3	2	3	3	3
370	0	0	48	3	仕事に対する漠然とした不安	7	0	0	0	0	0	0	1	0	0		0	3	6	4	5	5	2	4	2	3	2	2	1	4	1	3	2	4	3	4	1	4	2	4	3	4	5	4	2	3	2	1	4
422	0	0	38	3	人間関係。同僚と仕事上で言い争いになった。	7	0	0	0	0	0	0	1	0	0		0	7	7	3	2	2	2	3	2	5	4	4	2	5	2	5	3	3	4	1	4	2	4	4	2	4	2	2	2	2	3	2	3
426	0	1	34	3	職場の予定が当日変わること	7	0	0	0	0	0	0	1	0	0		0	6	4	6	4	4	3	3	2	2	3	4	2	4	3	3	4	4	3	2	3	2	3	3	3	2	3	3	3	3	3	2	3
441	0	0	32	3	周りが自己中が多く仕事を選び、やりたくない仕事が多く回ってくるが、やったらやったらで文句言われる。	7	0	0	0	0	0	0	1	0	0		0	6	6	4	4	4	2	3	3	4	4	4	2	3	3	4	4	3	4	3	2	3	3	4	2	3	4	3	2	3	2	4	2
463	0	0	32	3	クライアントからのクレームで半日近く謝罪に時間を要した事	7	0	0	0	0	0	0	1	0	0		0	4	5	6	4	3	2	2	3	2	2	3	4	3	2	4	3	2	3	4	2	3	3	2	4	3	4	3	4	2	3	2	2
494	0	0	36	3	仕事の人間関係で上の人間のやり方と下の人の仕事のやり方が違うのでかなりやりづらい感がある。	7	0	0	0	0	0	0	1	0	0		0	5	4	4	3	4	3	3	2	3	3	3	2	3	2	3	3	3	3	2	3	3	3	2	4	3	3	3	4	2	3	3	2
474	0	1	31	3	新型コロナウイルスの影響による仕事環境の変化	7	0	0	0	0	0	0	1	0	0		1	6	7	3	1	1	3	3	3	1	4	3	3	2	1	4	3	3	3	2	4	2	3	3	3	2	2	3	3	2	3	2	4
13	0	1	41	4	仕事のやりがいが感じられない、給与も上がる見込みがないと感じたため	7	0	0	0	0	0	0	1	0	0		0	7	7	5	6	5	5	2	1	1	1	1	1	1	1	1	1	3	1	4	1	5	1	1	5	5	5	5	5	4	3	1	4
17	0	1	41	4	ＰＴＡ活動の意義についての意見の違い。	7	0	0	0	0	0	0	1	0	0		0	7	6	6	3	2	3	2	2	5	1	1	2	2	2	1	1	4	1	4	2	5	1	2	5	4	4	5	4	3	3	1	3
26	0	0	41	4	人のミスで同じ作業をもう一度やり直さなければいけなくなってしまった。	7	0	0	0	0	0	0	1	0	0		0	5	5	2	5	5	3	4	3	4	3	4	2	3	2	3	4	4	3	2	2	4	2	2	3	4	4	4	4	3	2	2	3
62	0	1	42	4	今の仕事を初めて3年経つが、上司とは悪い関係ではないけれど時々3年も経つんだからいい加減覚えろとたまにちくちくと言われることがストレスです。	7	0	0	0	0	0	0	1	0	0		0	6	5	5	4	3	4	4	2	3	2	2	3	3	1	2	2	4	4	2	2	4	1	1	4	3	4	5	5	3	3	1	1
64	0	0	54	4	パワーハラスメント	7	0	0	0	0	0	0	1	0	0		0	7	7	3	4	2	2	2	2	3	3	3	3	2	3	3	3	3	3	2	3	2	4	4	1	4	3	2	2	2	3	3	3
79	0	1	33	4	仕事中のイライラ	7	0	0	0	0	0	0	1	0	0		0	4	5	5	5	4	2	2	2	3	2	4	4	2	4	2	1	1	2	4	4	5	1	2	5	3	2	5	4	2	4	1	4
96	0	1	28	4	求職活動と体力の問題	7	0	0	0	0	0	0	1	0	0		0	5	5	5	5	2	2	2	2	2	2	2	2	2	2	2	2	3	3	3	3	4	2	3	4	4	3	4	3	3	1	1	3
117	0	0	60	4	60歳で定年退職したが、時間を持て余し気味のため、できたらもう少し働きたい。	7	0	0	0	0	0	0	1	0	0		0	5	5	5	2	2	4	2	3	3	2	4	3	4	2	1	1	5	3	3	1	4	2	2	3	4	5	4	4	3	2	2	3
136	0	1	28	4	受けた仕事が思うように進まない。	7	0	0	0	0	0	0	1	0	0		0	6	2	6	1	3	4	2	2	4	3	2	2	1	1	4	3	2	1	5	2	4	2	2	4	4	4	4	4	3	2	1	4
139	0	0	43	4	会社内での、仕事を巡るトラブル	7	0	0	0	0	0	0	1	0	0		0	5	5	3	4	4	3	3	3	2	2	2	2	3	2	2	2	4	4	3	2	3	2	2	3	3	4	4	4	3	3	2	2
159	0	0	30	4	仕事の人不足により、装丁外の業務をしなければならなくなったことです。	7	0	0	0	0	0	0	1	0	0		0	7	6	6	5	5	2	2	2	3	2	2	3	2	1	2	2	3	3	2	2	4	3	2	2	2	4	3	4	3	2	2	2
178	0	0	34	4	業務繁忙で毎日のように残業が続き、休日出勤もありました。その際に若手社員が自分の業務を期日まで行えず、サポートを求める状態になっただけでなく、本人は残業せずに知らないふりをして帰るというのが続いてイライラしました。	7	0	0	0	0	0	0	1	0	0		0	7	3	5	2	4	1	4	4	1	5	1	2	4	1	1	1	1	1	1	3	1	4	2	2	3	3	2	4	2	2	1	4
181	0	1	35	4	職場でのモラハラ	7	0	0	0	0	0	0	1	0	0		0	7	7	6	4	5	5	1	1	3	4	5	1	5	1	1	3	5	3	4	3	5	2	2	5	5	3	4	4	3	1	4	4
188	0	1	42	4	会社の人間関係。正義あるような言い方をして、人を見下す人が多い。	7	0	0	0	0	0	0	1	0	0		0	7	7	5	2	4	4	4	3	4	4	5	3	4	3	3	2	4	3	4	3	3	3	2	4	4	3	3	4	2	3	2	3
222	0	0	38	4	会社で大切な仕事を長期間任された。	7	0	0	0	0	0	0	1	0	0		0	6	4	6	5	5	3	4	3	3	3	3	3	3	2	3	4	4	3	3	3	3	3	3	3	3	3	3	3	3	2	3	3
259	0	0	24	4	仕事がつまらない	7	0	0	0	0	0	0	1	0	0		0	7	7	3	2	2	2	2	2	2	2	4	2	2	2	4	4	2	4	2	4	2	4	4	4	2	2	2	2	2	4	3	2
279	0	1	24	4	職場の同僚がストレスの要因です。年上の女性なのですが、ミスをするとすぐに怒ったような口調で注意されてしまいます。もちろん、ミスをする自分が悪いのは分かっています。分からなかったら質問してと言われますが、質問したらしたで、「これも分からないの？」と言われてしまうので、関わること自体がストレスとなってしまいます。	7	0	0	0	0	0	0	1	0	0		0	7	6	7	3	2	2	4	1	4	2	1	1	2	1	4	1	5	3	4	2	2	3	2	4	5	4	3	4	2	1	2	3
316	0	1	40	4	転職して新しい仕事を覚えるのが大変	7	0	0	0	0	0	0	1	0	0		0	5	4	5	2	2	3	4	4	3	3	4	1	3	3	3	4	4	4	1	3	3	3	4	3	3	3	3	2	2	2	1	2
373	0	0	34	4	人間関係	7	0	0	0	0	0	0	1	0	0		0	7	7	1	1	3	2	1	1	1	5	5	1	1	1	1	1	1	1	1	5	1	5	5	1	1	1	1	1	3	4	2	1
375	0	1	47	4	仕事上の問題というより、人間関係です。合わない人と何時間も同じ空間にいなければならない事がストレスを感じます。	7	0	0	0	0	0	0	1	0	0		0	5	5	3	4	4	2	2	2	3	3	2	2	2	2	4	4	2	2	2	4	3	3	3	3	2	2	3	3	3	4	3	2
385	0	0	36	4	【仕事上の問題】食品会社の営業職を行っております。仕事を増やすことが役割ですが、一方で得意先との折衝、折り合いをつけることも重要な役割となっております。得意先の専属パートナーとして仕事をもらっているのですが、当然儲かる仕事と、あまり儲からない仕事のバランスを取ることが重要ですが、社内の一部経営層が儲かる仕事のみを要求してくる。複数の得意先を持って事業を行っているなら理解もできますが、専属である以上、一定の要求を飲まないとパートナーとして成立しない。あまりにも自分本位な姿勢が矢面に立つ身として非常にストレスを感じる。特に今年に入って要求が強く、その分だけストレスが増加していると感じている。	7	0	0	0	0	0	0	1	0	0		0	6	5	5	4	4	4	4	3	3	3	3	3	4	2	2	2	4	3	3	3	4	2	2	5	3	3	4	4	2	2	1	3
411	0	0	63	4	契約していた会社からの契約破棄により、仕事を失った。	7	0	0	0	0	0	0	1	0	0		0	7	6	3	1	4	3	3	2	2	3	3	2	3	2	3	1	1	2	2	4	4	3	3	4	2	2	3	3	3	2	1	4
457	0	0	45	4	仕事で転職しましたが転職先で上司にパワハラを受けた事	7	0	0	0	0	0	0	1	0	0		0	7	6	4	4	4	2	3	3	3	3	4	4	2	3	3	4	4	3	4	3	3	4	3	3	4	3	2	3	3	3	2	3
470	0	1	43	4	こっそりしていた転職活動が上司にバレてしまい、おそらく同僚にも伝わっており、仕事でのやり取りがキツくなるなどコミュニケーションが取りにくくなっています。	7	0	0	0	0	0	0	1	0	0		0	7	7	7	1	2	4	4	2	4	3	3	2	4	3	2	2	4	2	3	3	3	2	3	5	2	3	4	3	2	4	3	2
477	0	0	45	4	職場でパワハラを受けた	7	0	0	0	0	0	0	1	0	0		0	7	7	6	5	5	5	4	3	4	4	4	3	4	3	3	4	5	4	4	3	4	3	3	4	4	3	3	3	4	3	2	4
478	0	1	39	4	職場のハラスメント上司に被害を受け苦言を伝えたことがあるのだが、その上司が未だ別の人にちょっかいを出しており、リアルな現状を聞いて、当時の憂鬱さを思い出し、いつまた自分に関心を向けるのかと怖くなり、顔を見るのもストレスがたまった。	7	0	0	0	0	0	0	1	0	0		0	6	6	5	2	3	3	3	2	2	2	3	2	3	2	2	4	4	3	1	4	1	3	3	3	2	2	3	3	3	3	2	2
496	0	0	59	4	転職	7	0	0	0	0	0	0	1	0	0		0	6	5	6	4	4	3	4	3	4	3	4	2	4	2	3	4	4	4	3	2	4	2	2	3	3	4	4	4	2	3	2	3
118	0	0	51	4	コロナウィルスの影響で､やりたい趣味が減ってしまった。 コロナウィルスの影響で､仕事が減る可能性が高くなってきた。 仕事の技術向上に費やす時間が足りない。	7	0	0	0	0	0	0	1	0	0		1	5	5	3	3	3	3	4	3	4	2	4	3	4	3	3	4	4	3	3	3	4	3	2	3	3	3	3	4	2	3	2	3
187	0	0	36	4	コロナの影響で売上高が激減して生活をしていけるのかが不安	7	0	0	0	0	0	0	1	0	0		1	4	3	3	4	4	3	2	3	4	3	3	3	4	4	2	2	3	4	2	3	2	2	3	3	3	3	4	3	2	3	3	2
257	0	0	49	4	新型コロナウィルスの影響で、1月下旬から仕事のキャンセルが入りはじめて、 2月は片付けや普段出来ない事が出来たが、3月は完全に休業状態。 収入面やスタッフの給与の支払いなどの問題点が。	7	0	0	0	0	0	0	1	0	0		1	5	5	5	3	3	2	4	3	4	2	4	3	3	3	3	3	3	3	3	2	3	2	2	3	4	4	4	4	2	2	2	2
281	0	1	34	4	コロナウィルスで仕事が減った	7	0	0	0	0	0	0	1	0	0		1	7	7	1	2	2	4	4	4	4	2	1	3	4	2	1	1	4	3	3	3	3	3	3	2	3	3	3	3	3	2	2	3
21	0	0	39	5	先輩からのモラハラ	7	0	0	0	0	0	0	1	0	0		0	6	6	3	2	2	5	5	1	4	4	5	1	4	2	3	4	5	4	4	4	3	2	3	4	3	2	4	3	2	4	3	3
59	0	1	46	5	やらなくてはいけないことが多すぎて、時間がないという状況	7	0	0	0	0	0	0	1	0	0		0	6	5	5	6	6	4	4	3	2	3	3	2	4	2	2	4	4	3	4	2	4	3	2	4	4	4	3	4	3	2	2	3
83	0	1	24	5	無茶な仕事を取引先に振られた	7	0	0	0	0	0	0	1	0	0		0	5	6	7	4	3	4	3	4	3	3	3	3	2	3	4	3	3	4	4	4	4	4	4	4	4	2	2	2	2	3	3	3
101	0	1	31	5	会社での外国人の中途採用が多く仕事もできないのにもかかわらず 役職が一つ上で入ってくる。所属上司よりさらに上の外国人の上司（これまた中途）にプライベートで仲が良いためにひいきされて所属部署の上司の言うことは全く聞かないためやりたい放題でした。	7	0	0	0	0	0	0	1	0	0		0	7	7	1	3	3	3	1	1	3	1	1	1	1	1	1	1	1	1	4	1	5	1	1	4	5	5	5	5	4	1	1	4
127	0	0	45	5	仕事で大失敗し、会社に損害を与えてしまったこと。	7	0	0	0	0	0	0	1	0	0		0	7	6	6	5	3	3	4	2	2	3	2	2	3	2	2	3	4	3	3	3	4	2	2	4	4	3	4	4	3	2	2	2
167	0	0	36	5	仕事上での人間関係。社内での折衝に関してかなりストレスを感じた。	7	0	0	0	0	0	0	1	0	0		0	6	5	6	4	3	2	3	2	4	2	2	1	3	1	3	2	3	4	3	3	4	2	4	2	3	3	4	2	2	3	3	2
219	0	0	38	5	酒飲みの上司に付き合わされて、週2～3回のペースで深夜まで飲みに付き合わされたことが最大のストレスです。	7	0	0	0	0	0	0	1	0	0		0	7	6	2	2	1	4	5	3	3	4	5	3	5	3	5	2	2	5	3	3	4	2	2	3	3	3	4	4	3	2	2	3
221	0	1	49	5	ある仕事が、急に終了することが決定した。	7	0	0	0	0	0	0	1	0	0		0	5	5	5	4	5	3	4	3	3	4	3	3	3	2	3	3	4	3	3	2	4	2	3	4	3	4	4	3	2	3	2	3
240	0	1	50	5	家にいる時間が多くなった。やりたいこと、やらなくてはならないことがあるのに、心と体が前向きにならず、事が進まない。動けない自分に腹がたつ。	7	0	0	0	0	0	0	1	0	0		0	7	6	7	1	1	4	5	2	4	2	2	2	4	1	2	4	4	5	3	3	3	2	2	3	3	3	4	4	3	2	1	3
267	0	1	54	5	今まで行っていた業務と全く違う内容の仕事を満足な引継ぎもなく押し付けられたこと	7	0	0	0	0	0	0	1	0	0		0	6	3	6	4	5	3	3	2	3	4	2	2	3	1	1	2	4	2	3	2	4	2	2	3	4	4	4	4	4	2	2	4
416	0	1	27	5	仕事上のパートナーに「これをお願いします」と頼んだのに、２日経っても取り組んでくれなかった。進捗を聞いても「明日でもよいですか」と言われ、期日を伝えたが「それまでにはできません」と断れた。先輩後輩ならともかく、同等の立場の人だったので、私が指導しないといけないのか、と苛立ちを覚えた。	7	0	0	0	0	0	0	1	0	0		0	7	6	2	2	2	4	2	2	1	4	2	2	2	1	2	1	1	1	2	2	4	2	4	4	4	4	4	2	3	2	1	1
423	0	0	41	5	仕事で無理難題を言われて、無駄に奔走したこと。	7	0	0	0	0	0	0	1	0	0		0	7	7	6	5	4	2	1	1	1	1	1	1	2	1	1	1	1	1	2	2	3	2	2	4	3	4	4	4	3	1	1	4
440	0	0	30	5	はじめまして。僕はフリーランスとして活動しております。クライアント様に福祉施設様があります。 そこの代表様や職員さんたちとは、とても気心が知れており、仲が良くビジネスをさせてもらっております。 利用者様も顔見知りとなりました。しかしながら、利用者様の男性で、何回も同じことと言い、何回も自分に絡んでくる方がおります。 最初は笑って流していたのですが、とてもストレスになってしまい、笑って流すことが出来ずにおりました・・・だからといって怒るわけにもいかず・・・何とも言えないストレスから胃痛や腹痛に悩みました。 病院へ行き検査をしても、何の異常もないのです。内科の先生、胃腸科の先生から言われたのが、「ストレスじゃないかな？」「デリケートっぽいですよね。おそらくメンタルへのストレスがあると思いますよ」と言われました。 やはりこのようなストレスは、無意識のうちに蓄積されているものだと自覚しました。	7	0	0	0	0	0	0	1	0	0		0	7	7	1	5	6	3	5	3	5	5	5	3	2	3	4	1	2	1	2	5	1	5	5	2	1	1	1	1	3	4	3	4
459	0	1	50	5	仕事上の人間関係や残業による疲労	7	0	0	0	0	0	0	1	0	0		0	5	5	3	4	4	3	3	3	2	4	3	2	3	2	4	4	4	3	2	3	4	2	3	4	3	3	4	3	3	3	3	3
469	0	0	43	5	仕事が忙しく残業が多くて、プライベートの時間をほとんど取ることができない状態が続いている。	7	0	0	0	0	0	0	1	0	0		0	6	5	5	3	5	2	3	3	5	2	2	1	2	1	4	2	4	2	2	2	3	3	1	4	3	4	3	5	2	1	1	4
196	0	1	44	5	就職活動をしたいとおもっているが次のような状況でなかなか思うようにいかないことが最も大きなストレスの要因であると思われます。新型コロナの如何ともしがたい影響及び現時点で仕事をしていない状況では保育園に幼児を入れることができないこと。	7	0	0	0	0	0	0	1	0	0		1	6	6	4	2	2	4	3	3	2	3	3	2	3	2	2	3	4	4	2	2	2	3	2	4	4	4	3	4	3	2	2	3
30	0	1	43	6	職場で自分の経歴や能力を知ろうともせず、勝手に何もできない・知識もないと決め付けてくること。自分の自慢話・苦労話・愚痴・ため息・舌打ちを隣のデスクで毎日聞かされたこと。	7	0	0	0	0	0	0	1	0	0		0	7	7	1	6	6	4	3	3	4	3	1	2	3	3	3	3	5	4	4	2	5	1	1	5	4	4	5	5	3	1	1	4
52	0	1	30	6	職場の人間関係がもっと大きなストレス要因です。 所属部署の移動により、配属になった部署の人間関係の悪さに悩む日々が続き、ストレスが溜まっています。	7	0	0	0	0	0	0	1	0	0		0	6	4	2	3	4	4	5	3	2	2	2	2	3	1	4	4	5	2	3	1	4	2	1	3	3	5	4	5	3	2	2	3
68	0	1	26	6	退職する人間との引継ぎ業務。やる気のない、人だったため非常に苦労した。	7	0	0	0	0	0	0	1	0	0		0	7	7	5	4	4	3	3	4	3	3	2	3	3	3	4	2	2	2	1	2	3	4	4	5	5	4	2	2	4	2	2	2
73	0	0	25	6	満員電車	7	0	0	0	0	0	0	1	0	0		0	5	3	3	4	4	3	4	2	2	2	2	3	3	2	3	4	3	3	4	2	3	4	3	4	4	4	2	3	3	2	2	3
93	0	0	44	6	仕事の依頼を受けたが、その仕事が当方の力量では到底達成できない内容のものであったので、クライアントと相談の上で断る事になった。当方の見込みの甘さとクライアントに対する責任を果たせなかった事、今後仕事の依頼を受けられるかどうかの不安などから精神的に落ち込んでしまい、イライラする日々がしばらく続いた。	7	0	0	0	0	0	0	1	0	0		0	6	7	7	1	1	5	4	3	3	5	3	3	4	3	4	5	5	4	3	2	3	1	2	3	3	4	5	4	2	4	4	2
231	0	0	39	6	時間のかかる仕事を抱えてる時に上司から追加で仕事を渡されてイライラした。	7	0	0	0	0	0	0	1	0	0		0	7	5	4	6	5	3	4	3	5	2	2	3	4	1	2	4	4	5	2	3	2	4	4	2	2	3	2	2	4	1	1	4
246	0	0	46	6	昇格試験がダメだった	7	0	0	0	0	0	0	1	0	0		0	5	6	4	4	4	4	3	3	4	2	3	3	3	3	3	2	3	2	3	2	2	3	1	3	2	4	3	5	2	3	2	2
296	0	0	53	6	仕事でのストレス（今まで経験のない仕事を担当すことになった）	7	0	0	0	0	0	0	1	0	0		0	7	6	7	4	4	3	3	4	1	3	2	3	3	3	3	2	5	3	3	1	4	1	2	3	3	5	5	4	2	3	2	2
308	0	1	40	6	在宅でやっている仕事が忙しくなった。一週間のうちまともに寝たのは2日程で後は毎日徹夜。徹夜した翌日も寝る時間はなく仕事をして、寝ずにまた徹夜、また寝る時間はなく夜まで寝る時間はなかった。一週間でおわる予定だったが、追加の仕事があり結局2週間この生活であった。とても疲れた。	7	0	0	0	0	0	0	1	0	0		0	7	4	7	7	7	5	4	5	5	5	5	3	4	1	2	2	2	5	2	4	4	4	5	5	4	2	2	1	3	4	1	4
312	0	0	39	6	仕事上の無理難題	7	0	0	0	0	0	0	1	0	0		0	7	7	1	1	1	3	2	2	3	2	3	2	3	2	2	3	3	2	2	2	3	3	3	2	2	4	3	3	2	3	2	2
321	0	1	50	6	職場での人間関係が大きなストレスです。 仕事を何度教えても出来ず、自分でオリジナルルールを作り、周囲に迷惑をかけても自覚がない方が２名もいることが要因です。	7	0	0	0	0	0	0	1	0	0		0	7	7	6	6	6	3	2	3	3	2	2	2	2	2	2	2	4	2	2	2	3	3	2	3	3	4	3	4	3	1	2	3
343	0	1	26	6	仕事上の問題 新卒2年目の営業職ですが、営業数字のプレッシャーや上司からの圧力、また同期の社内恋愛のもつれなどに悩み大きなストレスを抱えていました。	7	0	0	0	0	0	0	1	0	0		0	6	6	4	3	5	4	4	2	3	3	4	2	2	3	2	4	4	3	4	3	4	2	2	3	4	3	4	4	3	2	2	3
348	0	0	30	6	仕事上の問題。波長の合わない同僚とのコミュニケーションに苦心。	7	0	0	0	0	0	0	1	0	0		0	6	6	3	4	5	3	4	2	2	3	3	2	2	2	3	2	4	4	3	2	3	2	3	3	4	4	4	3	2	2	2	3
376	0	1	49	6	勤務先のコンピューターシステムが新しくなり、稼働を始めたら不具合だらけで業務に多大な支障が出てしまったことです。	7	0	0	0	0	0	0	1	0	0		0	7	6	5	5	4	2	3	2	4	2	4	1	1	1	1	1	1	2	2	4	2	3	3	4	3	2	3	3	3	1	1	4
408	0	0	40	6	重要な内容な仕事なのに、私には伝えられず除け者にされてしまった。 長年勤めているのにも関わらず、そのような対応をされ、裏切られた気持ちになった。	7	0	0	0	0	0	0	1	0	0		0	7	7	5	2	2	3	4	3	4	4	4	2	3	3	3	4	5	4	4	4	4	3	3	3	4	2	3	3	2	3	4	2
442	0	1	41	6	仕事でミスをしてしまったこと。	7	0	0	0	0	0	0	1	0	0		0	6	6	7	2	2	3	4	2	4	4	4	1	4	1	3	4	3	5	2	2	4	1	2	4	4	4	5	4	3	2	1	4
452	0	0	38	6	言っていることが通じない上司との関係	7	0	0	0	0	0	0	1	0	0		0	6	5	7	5	5	1	2	1	2	2	1	1	1	1	1	1	1	1	1	4	4	1	1	5	5	2	5	5	3	1	1	4
490	0	0	32	6	仕事を退職し、転職に伴う不安からくるストレス	7	0	0	0	0	0	0	1	0	0		0	6	5	6	4	5	4	4	3	4	4	4	3	4	3	3	3	3	4	2	3	4	2	2	4	4	3	4	4	3	2	2	4
44	0	1	46	6	仕事がコロナウイルスのおかげでキャンセルになってしまった	7	0	0	0	0	0	0	1	0	0		1	5	5	1	2	4	4	3	3	2	3	2	3	3	2	3	3	3	3	3	3	3	2	2	4	2	3	4	4	2	3	2	2
309	0	0	43	6	コロナのおかげで自宅待機を言い渡された	7	0	0	0	0	0	0	1	0	0		1	5	5	4	4	4	3	3	2	3	2	3	3	2	3	3	3	3	3	3	3	3	3	3	4	3	3	3	3	2	3	2	2
319	0	0	50	6	年末に発注した商品がコロナの影響でまだ発送されていない。	7	0	0	0	0	0	0	1	0	0		1	6	6	6	1	4	3	4	3	3	3	4	3	4	4	4	4	4	4	2	2	4	2	2	3	2	4	4	4	3	2	2	3
420	0	0	56	6	シンガポール、沖縄および神戸へ出張が続いたこと。コロナウイルスの影響が気になった。	7	0	0	0	0	0	0	1	0	0		1	6	3	5	6	5	4	3	2	4	3	3	2	3	2	3	4	4	3	2	2	4	2	2	3	3	4	4	4	3	2	3	3
447	0	0	33	6	コロナウイルスの影響で仕事面に大きな影響がでてきて社員全員がピリピリしたムードになっている、これが毎日続くのでストレスになっている。	7	0	0	0	0	0	0	1	0	0		1	6	6	2	3	3	3	3	2	3	3	2	2	3	2	2	2	3	2	2	2	3	3	3	3	3	4	3	3	3	2	2	4
456	0	0	31	6	コロナウイルスで仕事が忙しくなっていること	7	0	0	0	0	0	0	1	0	0		1	7	7	7	5	3	2	2	4	2	2	2	3	2	1	2	2	4	4	4	1	5	1	1	4	3	5	5	5	2	2	2	3
475	0	0	32	6	コロナ →コロナにより、休業補償や業務時間短縮といった業務変化に対する急なシステム対応	7	0	0	0	0	0	0	1	0	0		1	6	5	3	4	4	3	2	2	2	2	2	2	2	1	2	1	2	2	1	3	2	3	2	2	3	3	3	4	3	2	1	4
35	0	1	27	7	ルールを守らない人への対応の仕方に対する意見が他人と違ったこと。	7	0	0	0	0	0	0	1	0	0		0	6	7	5	5	5	3	2	2	3	2	4	2	4	2	4	3	4	5	2	4	3	3	3	2	2	2	3	3	3	2	1	3
41	0	0	41	7	仕事が忙しすぎる	7	0	0	0	0	0	0	1	0	0		0	5	4	5	6	4	2	2	2	3	2	3	3	2	1	1	1	1	1	3	2	3	1	1	5	4	4	5	5	3	2	1	3
47	0	0	32	7	入社が浅いのに責任者となった	7	0	0	0	0	0	0	1	0	0		0	7	3	7	3	2	3	3	3	3	2	3	3	3	2	3	2	3	3	4	3	4	3	2	3	4	3	3	4	2	3	3	3
114	0	0	50	7	仕事の人間関係	7	0	0	0	0	0	0	1	0	0		0	7	6	5	3	3	4	4	2	2	2	2	2	3	2	2	2	3	2	2	4	4	2	4	4	4	2	4	2	2	3	3	2
149	0	0	34	7	仕事でストレスが溜まりました。 どれほど仕事を段取りよくこなしてもあまり評価されず、なんか嫌気がさしてきました。	7	0	0	0	0	0	0	1	0	0		0	6	3	6	1	2	4	5	3	2	4	2	2	4	2	5	1	5	4	2	2	4	1	2	4	5	4	5	4	2	2	3	1
163	0	0	34	7	仕事上の問題が最も大きなストレスでした。やりがいを感じない仕事、意味のない作業の強要などがそれにあたります。	7	0	0	0	0	0	0	1	0	0		0	7	6	1	5	2	3	4	4	4	4	2	2	3	1	4	5	3	4	2	4	4	3	3	4	1	2	3	3	2	3	2	3
261	0	0	33	7	仕事上の人間関係。自分より仕事をしないし，仕事の精度も低い人間が，自分より高い職位にあることが日常的に我慢ならないし，その人間の仕事の後始末のために多くの時間を費やすことになっているのがとてもストレスである。	7	0	0	0	0	0	0	1	0	0		0	6	6	2	3	4	4	3	2	3	4	3	2	3	1	2	4	2	2	3	4	2	4	4	4	3	2	2	2	2	4	2	2
355	0	0	38	7	仕事の問題	7	0	0	0	0	0	0	1	0	0		0	5	3	6	6	6	1	1	1	2	1	1	1	1	1	1	1	2	1	1	2	4	5	2	1	4	4	1	4	3	4	1	4
403	0	0	60	7	退職したが再就職先が見つからないこと。	7	0	0	0	0	0	0	1	0	0		0	7	7	5	1	4	3	4	4	4	3	4	2	4	2	2	3	4	2	3	4	4	2	1	5	4	2	4	5	3	3	3	2
211	0	0	36	7	コロナウイルスの影響で中国の工場から部品が輸入できず生産がストップしてしまったので客先対応と納期調整に連日追われて多忙だったこと	7	0	0	0	0	0	0	1	0	0		1	6	6	3	5	5	3	2	3	3	2	2	2	2	2	2	2	2	2	3	3	4	2	2	3	4	3	4	4	2	3	3	3
193	0	0	45	8	後輩の態度があっさりしすぎていて目を見て話してもらえなかったこと	7	0	0	0	0	0	0	1	0	0		0	5	5	3	4	4	4	4	2	2	3	4	2	4	3	2	2	3	4	4	2	4	2	2	5	5	4	4	4	3	4	4	2
332	0	0	44	8	転職しましたが、前職は暇、上司が全く使えないなど、 かなりのストレスを受けていました。会社での人間関係のストレスは半端ありません。	7	0	0	0	0	0	0	1	0	0		0	7	6	4	5	2	4	3	3	4	3	3	4	3	4	3	3	3	3	3	3	3	3	3	3	2	3	3	3	3	2	3	2
334	0	1	42	8	収入の少なさについて	7	0	0	0	0	0	0	1	0	0		0	5	5	6	3	2	1	1	1	1	3	3	1	1	1	3	4	1	3	3	4	3	1	2	4	3	2	5	4	2	2	3	3
432	0	0	39	8	コロナウイルスによって売り上げが落ちている。	7	0	0	0	0	0	0	1	0	0		1	6	6	5	5	5	3	4	2	3	2	3	2	4	2	3	3	4	4	4	2	4	2	2	5	4	4	4	4	3	2	1	4
446	0	1	38	8	コロナウイルスの影響による仕事のストレス	7	0	0	0	0	0	0	1	0	0		1	6	7	3	1	1	3	5	3	3	3	5	3	5	5	3	4	5	5	3	3	3	2	2	5	3	3	4	4	2	4	3	2
115	0	0	24	9	朝の通勤に使う2路線がともに人身事故で遅延した	7	0	0	0	0	0	0	1	0	0		0	7	7	1	5	3	1	4	4	4	2	2	4	4	1	1	2	5	4	2	2	2	4	4	4	2	4	2	2	2	4	1	3
175	0	1	57	9	職場の人間関係です。私は、けっこう、人に気を使う方です。その方も、ナイーブな方でしたので、すごく、細かく気を使って、話をするようにしていました。しかし、他の同僚が、気にしていたことを、上手に伝えようと話しかけた時の、タイミングが、その方にとっては、いけなかったのでしょう。 これから、これをこうすると言う思いでいる時に、私が、同僚からの頼み事を、とても、気を使いながら声かけしました。忙しい中で、それをしにいかれたので、その方にとっては、予定が狂い、大変だったのでしょう。その後、バタバタとしていらっしやった彼女に、すみませんでしたねと、一声かけました。すると、ぷいっと顔を背け、わたさの横を通り過ぎていったのです。悲しかなりました。あれだけ気を使っていたその方の対応に。でも、その方は、自分の取られた態度は、気に求めずに、普通にしておられました。そな日は、傷つき、早退をしてしまいました。自分を励…	7	0	0	0	0	0	0	1	0	0		0	7	5	2	4	5	3	5	3	3	3	4	3	4	1	1	1	5	4	3	2	4	1	1	4	5	4	5	5	3	2	1	3
225	0	0	65	9	職場での人間関係	7	0	0	0	0	0	0	1	0	0		0	6	2	6	6	6	2	2	2	1	2	2	4	2	1	1	2	2	4	3	3	2	2	2	2	3	3	4	4	3	1	1	4
280	0	1	54	9	仕事で上司にしかられた。	7	0	0	0	0	0	0	1	0	0		0	6	6	4	3	3	2	4	2	2	2	3	4	3	2	2	2	4	2	4	2	2	4	4	2	2	4	2	2	3	2	3	2
369	0	0	47	10	上司からのパワハラ	7	0	0	0	0	0	0	1	0	0		0	6	7	1	1	1	1	3	5	1	5	5	5	5	1	5	1	5	5	4	1	5	4	1	3	5	5	2	5	2	4	4	1
283	0	1	46	1	別居中の夫が、婚姻費用をはらってくれなくなったこと。婚姻費用を支払いたくないために、勝手に仕事を辞めたことです。経済的に困窮しているし、仕返しに合っているようで、将来も不安で、とても苦痛です。	8	0	0	0	0	0	0	0	1	0		0	7	7	4	1	1	2	3	4	2	3	3	3	4	1	4	1	4	3	5	2	5	1	2	4	4	4	5	4	3	3	3	3
174	0	0	46	1	新型コロナウィルスの騒ぎで世界の経済が不況に陥っていくのが不安。	8	0	0	0	0	0	0	0	1	0		1	6	7	3	1	2	4	5	1	3	5	5	1	4	3	5	5	4	4	1	2	4	2	1	4	2	4	4	5	1	4	3	1
123	0	0	50	2	記憶力が著しく低下していると感じたこと。 また10年以上、非正規雇用で働いてきたため収入が不安定で貯蓄も皆無であり 体力的な衰えも強く感じることが多々あり複合的にストレスを感じた。	8	0	0	0	0	0	0	0	1	0		0	7	7	5	1	1	1	2	5	4	5	2	1	1	1	4	5	5	1	1	5	4	3	3	1	2	1	3	3	1	4	4	1
40	0	0	35	3	将来の不安などのストレスから自律神経のバランスを崩し、体調不良が続いた。	8	0	0	0	0	0	0	0	1	0		0	7	7	7	2	2	4	3	4	3	2	4	2	3	2	4	4	4	3	3	2	3	4	2	3	3	4	2	4	1	2	1	3
212	0	0	40	3	自身の収入の少なさからくる得も言われぬ重圧を受けることがある。	8	0	0	0	0	0	0	0	1	0		0	7	7	6	5	4	1	4	3	3	3	2	2	3	4	2	3	4	4	3	2	2	2	3	3	3	4	4	3	3	2	1	1
493	0	0	68	3	自営業を営んでいますが、老後の貯えも無く、現実的に仕事も減っていき将来の不安で夜も寝られない。	8	0	0	0	0	0	0	0	1	0		0	7	7	7	1	1	4	4	2	5	4	1	2	4	4	4	5	3	5	4	2	4	2	2	3	5	4	4	4	3	2	3	2
39	0	1	26	3	コロナウイルスによるマスク不足	8	0	0	0	0	0	0	0	1	0		1	6	6	1	1	3	5	4	4	4	2	4	2	5	4	5	5	2	5	4	2	2	4	4	2	3	4	2	2	3	2	2	2
392	0	0	46	3	新型コロナが世界中に蔓延して、経済が混乱し、先行き不透明な世の中になってしまったこと。	8	0	0	0	0	0	0	0	1	0		1	5	6	1	4	1	4	4	2	4	2	2	2	4	2	2	4	4	4	1	2	4	2	4	4	2	4	4	2	2	3	2	3
3	0	0	39	4	引っ越しの手続きが多くて大変だったこと。	8	0	0	0	0	0	0	0	1	0		0	6	2	5	7	6	3	4	4	2	3	3	4	4	4	1	2	1	4	3	4	1	4	4	3	3	2	2	2	3	2	3	1
224	0	1	18	4	フリーターとして過ごす事による将来の先行きが見えない不安	8	0	0	0	0	0	0	0	1	0		0	7	6	5	6	4	1	4	1	1	4	4	1	3	1	5	5	4	5	3	2	4	2	2	5	1	4	4	4	3	3	3	2
339	0	0	60	4	昨年60歳定年到達時、年老いた母の面倒みる為、日中の病院付き添いの為、再雇用延長もせず、また現在もフルタイムでの再就職もままならない状況による要因と思います。、	8	0	0	0	0	0	0	0	1	0		0	4	4	4	4	4	2	4	5	4	2	2	3	3	1	2	2	2	2	3	1	4	2	2	3	3	5	4	4	3	2	2	3
57	0	1	32	5	持病があり、フルタイムでの仕事ができない。 年齢的にそろそろ出産も視野に入れているが、出産後仕事につけるイメージがない。	8	0	0	0	0	0	0	0	1	0		0	6	6	7	2	2	3	2	3	3	5	2	2	3	1	1	1	2	2	1	3	4	1	1	3	3	3	5	5	3	1	1	4
10	0	0	22	6	就職活動に関するストレス	8	0	0	0	0	0	0	0	1	0		0	5	6	5	4	4	4	4	3	4	3	2	2	2	1	3	4	3	3	2	2	4	2	2	4	4	4	4	4	3	3	2	3
43	0	1	31	6	転職活動への焦り	8	0	0	0	0	0	0	0	1	0		0	7	6	7	6	6	3	4	3	4	2	1	3	2	2	3	2	4	4	3	2	4	2	2	4	4	4	4	4	3	1	1	4
331	0	1	34	6	年末調整、扶養手当などの書類提出のこと。	8	0	0	0	0	0	0	0	1	0		0	7	5	7	7	7	3	2	2	2	4	4	1	1	1	1	1	3	1	4	1	3	2	2	4	5	5	4	4	3	3	2	4
290	0	0	28	6	コロナウイルス	8	0	0	0	0	0	0	0	1	0		1	5	5	2	2	2	3	3	2	3	3	3	2	3	2	3	3	3	3	2	4	3	2	3	4	3	2	4	3	2	3	2	3
164	0	0	48	8	運転免許の卒業検定に落ちた	8	0	0	0	0	0	0	0	1	0		0	6	6	4	3	3	2	3	3	3	3	4	2	3	3	4	3	4	4	2	3	2	4	2	3	3	3	2	4	1	4	4	1
322	0	1	29	8	この先どうなるのかという漠然とした不安	8	0	0	0	0	0	0	0	1	0		0	6	6	3	2	2	2	3	2	3	4	2	2	3	3	4	5	4	4	3	4	3	2	2	2	2	2	4	4	3	3	2	3
350	0	1	46	8	子どもの学校の教師と生徒の不誠実で狡い態度と対応	8	0	0	0	0	0	0	0	1	0		0	7	7	6	3	5	2	2	1	4	4	3	3	2	1	2	1	1	1	1	5	2	1	2	2	4	1	5	4	2	3	3	3
358	0	0	44	8	新型コロナウイルス感染拡大により、感染のリスクや経済がどの程度落ち込むかといったリスクに対するストレス	8	0	0	0	0	0	0	0	1	0		1	6	6	2	2	2	3	3	3	2	2	2	2	2	2	2	2	2	2	3	3	4	3	2	3	4	3	3	4	3	1	1	3
132	0	0	50	1	近隣住民の騒音	9	0	0	0	0	0	0	0	0	1	近隣住民との人間関係	0	7	6	1	1	1	3	3	2	4	4	4	3	4	1	4	3	4	4	1	4	2	4	4	3	2	2	2	2	2	4	4	2
200	0	0	40	1	隣人の家の電気が24時間常時点けられている。それにより自宅の駐車場およびベランダ、庭などが照らされる形となり、眩しさとプライバシーの侵害を感じ不快である。もともと隣人や地域で孤立しているためその一環のものと思える。	9	0	0	0	0	0	0	0	0	1	近隣トラブル	0	7	7	5	2	4	5	4	1	2	2	4	1	2	1	4	4	4	3	3	2	5	4	1	4	3	4	2	5	1	4	3	3
451	0	0	43	1	猫が夜に部屋を走り回ること	9	0	0	0	0	0	0	0	0	1	ペット関係	0	5	3	5	1	1	4	3	1	2	3	4	2	4	2	4	4	5	4	1	3	3	1	3	2	2	3	5	3	2	4	4	3
210	0	0	51	2	新興宗教にのめり込み２０年以上音信不通だった叔父が突然我が家にやって来たこと。	9	0	0	0	0	0	0	0	0	1	親戚関係	0	7	7	1	3	2	3	4	2	1	4	3	2	3	1	3	3	4	4	3	2	4	2	3	4	4	4	4	3	4	2	3	3
310	0	1	36	2	ここ２年ほど自宅の近所で野良猫が増えているのですが、ご近所の住人の誰かが、私が野良猫に餌を与えていると誤解したらしく、市役所にその旨を通報したようです。市役所の方から事実の確認が行われ誤解であることは伝えましたが、非常に不快な思いをしました。	9	0	0	0	0	0	0	0	0	1	ご近所関係	0	7	7	6	3	3	3	4	3	2	4	4	3	4	4	3	3	4	4	3	3	3	3	3	4	3	3	3	3	3	4	3	2
465	0	0	44	2	近所の車の騒音	9	0	0	0	0	0	0	0	0	1	生活環境	0	7	7	1	3	3	3	2	3	2	2	3	3	3	2	2	2	3	3	2	3	3	3	4	3	4	3	3	2	3	2	2	3
330	0	0	33	2	この時期に欧州に旅行に行き、新型コロナウイルスに感染した人の話。	9	0	0	0	0	0	0	0	0	1	ニュース	1	6	6	2	2	2	2	3	3	3	2	4	2	3	4	2	4	3	3	3	3	3	3	3	3	4	3	3	3	2	3	3	2
384	0	0	44	2	コロナウイルス騒動のせいでマスクやトイレットペーパーが入手困難になったことです。 私は花粉症なので、未だマスクが入手しづらい状況なのには本当に参っていて非常にストレスになっています。	9	0	0	0	0	0	0	0	0	1	日用品の購買	1	7	6	2	2	2	4	4	3	3	3	4	3	3	3	4	4	4	4	2	4	2	4	4	4	2	2	2	2	2	3	3	2
25	0	1	55	3	職場の同僚とウマが合わないので、一緒に仕事をしているとイライラさせられる	9	0	0	0	0	0	0	0	0	1	職場の人間関係	0	6	5	1	1	3	2	3	1	2	3	4	1	3	2	4	3	3	4	2	4	3	3	4	3	3	2	3	2	2	2	2	2
180	0	1	24	3	自動車事故です 追突された、ショックが大きい	9	0	0	0	0	0	0	0	0	1	事故	0	7	7	4	6	7	4	4	1	2	3	5	1	5	1	4	2	4	2	4	2	4	2	4	5	3	4	4	2	4	1	1	4
274	0	1	45	3	ご近所の騒音トラブル	9	0	0	0	0	0	0	0	0	1	ご近所トラブル	0	7	6	4	1	3	2	2	2	1	1	1	2	2	2	2	3	3	3	4	3	3	2	3	2	4	3	4	3	2	4	3	2
325	0	0	42	3	ご近所トラブル。近所に以前警察沙汰を起こした精神障碍者が住んでおり、深夜に人の家の庭先に来て奇声を上げたりする。防犯カメラやライトで対策しているが、証拠は撮れず（映らず）、警察に相談してもこちらが嘘を言っているように言われる。精神障碍者の親もこちらが悪いようなことを近所に言いふらしている様子で、本当に大きなストレスになっています。	9	0	0	0	0	0	0	0	0	1	ご近所トラブル	0	7	7	2	1	1	3	2	2	1	2	3	1	3	3	4	2	4	4	4	3	4	2	2	4	3	3	4	4	1	3	2	3
409	0	1	45	3	マンションの来客用の機械式駐車場に、管理人さんの立ち会い・指示のもと車を入れたら、サイズが合っていなくて車に傷がついてしまった。	9	0	0	0	0	0	0	0	0	1	事故	0	7	7	7	4	2	3	3	2	2	2	2	2	2	2	2	3	2	3	4	2	4	2	2	3	3	4	4	4	3	2	2	3
413	0	0	38	3	就労以降支援の事業所に入所し、そこで周囲の人とコミュニケーションをきちんと取れるかどうかがかなりのストレスになった。	9	0	0	0	0	0	0	0	0	1	対人関係	0	6	3	3	4	4	2	3	1	1	1	2	1	2	1	1	2	4	1	3	2	5	1	1	5	3	4	5	5	3	1	1	4
23	0	0	43	3	コロナウイルスの影響で小学校が休みになったことと、外出自粛などがあり日常生活が混乱したこと。	9	0	0	0	0	0	0	0	0	1	コロナウイルス	1	6	7	2	1	1	2	3	4	4	1	2	4	4	2	4	1	4	3	3	2	4	2	2	3	4	4	4	4	3	1	1	4
286	0	1	66	3	コロナウイルス関連で、トイレットペーパーやティッシュペーパーが品切れで買えず、家にあるトイレットペーパーやティッシュがなくなってしまったらどうしようと思いとてもストレスを感じました。	9	0	0	0	0	0	0	0	0	1	生活必需品が手に入らない	1	7	6	1	1	1	1	1	1	1	1	1	1	1	1	1	3	1	1	3	3	3	2	1	3	2	3	4	5	3	2	2	3
342	0	0	31	3	コロナウイルスの影響で全く外に出れないし遊べないし、趣味のスポーツ観戦も出来ないから。	9	0	0	0	0	0	0	0	0	1	コロナウイルス	1	5	6	4	4	5	1	5	1	3	5	5	1	5	5	5	5	5	5	1	3	1	3	3	4	4	3	3	3	2	4	3	1
352	0	0	34	3	コロナウィルスで外出を控えているので、予定していた旅行を中止しました。	9	0	0	0	0	0	0	0	0	1	コロナウィルス関連	1	6	6	2	2	4	1	3	2	3	2	2	2	3	1	2	1	2	2	3	4	4	3	4	3	4	2	3	2	2	3	4	2
215	0	0	37	4	自転車が逆走してきた	9	0	0	0	0	0	0	0	0	1	交通	0	5	4	3	4	4	4	4	3	4	3	3	2	4	2	4	4	3	4	2	3	2	3	3	3	2	3	3	3	2	4	3	2
201	0	1	26	4	コロナの影響で、半年以上前から予約していた海外旅行がなくなってしまった事です。	9	0	0	0	0	0	0	0	0	1	遊び	1	6	7	4	3	1	4	4	3	3	3	4	2	3	2	2	4	4	4	3	4	4	3	2	3	4	2	3	4	3	2	1	3
204	0	0	31	4	新型コロナウイルスの影響で今年の5月に予定していた旅行をキャンセルしなければならかったこと	9	0	0	0	0	0	0	0	0	1	レジャー	1	5	6	5	5	4	3	2	4	2	2	2	2	3	2	1	1	3	2	2	4	1	4	4	2	2	2	2	2	3	3	2	3
301	0	0	33	4	コロナショックによる株の損失	9	0	0	0	0	0	0	0	0	1	社会環境	1	7	7	1	1	1	3	2	2	3	2	2	2	2	2	2	2	2	2	1	4	1	4	4	2	2	2	2	2	2	3	3	2
305	0	1	29	4	新型コロナウイルスの影響で行動が制限され、家族以外と話す機会が減ったり、自分の時間がないこと。	9	0	0	0	0	0	0	0	0	1	生活環境	1	6	6	5	2	2	4	4	2	3	2	5	2	3	4	5	4	4	5	3	3	3	2	2	4	5	3	4	4	2	3	1	4
445	0	0	51	4	テレビや各マスコミでのコロナウイルスの危機を煽るような報道	9	0	0	0	0	0	0	0	0	1	社会問題	1	6	7	1	1	1	2	4	1	1	2	1	2	4	1	3	1	4	2	3	2	3	2	2	3	3	4	4	4	2	3	3	2
213	0	1	41	5	閉所恐怖症の私が満員電車で通勤する時、ホームで電車を待っている時間の強い心臓の鼓動	9	0	0	0	0	0	0	0	0	1	乗り物	0	7	7	4	4	5	2	4	4	2	3	4	4	4	2	2	4	2	4	2	4	2	3	3	2	1	2	3	3	2	3	3	3
140	0	1	44	5	コロナウィルスの影響で、活動が制限されていること。	9	0	0	0	0	0	0	0	0	1	自由に行動できない	1	7	7	1	1	1	3	5	2	2	2	2	2	3	2	2	3	3	3	3	2	4	1	2	2	3	4	5	4	3	2	2	4
154	0	0	50	5	コロナウィルスの影響で学校が休みになった子供たちが自宅のそばの公園で朝から夕方まで毎日騒いでうるさい。	9	0	0	0	0	0	0	0	0	1	騒音問題	1	7	6	1	1	1	4	3	1	2	1	1	1	3	1	1	1	4	3	3	2	3	2	3	4	4	4	4	3	3	2	1	4
95	0	0	43	6	安部総理及び日本政府の対応です。経済、新型肺炎、公文書改竄等、その対応に不審があり、イライラが募り、もの凄くストレスを感じています。	9	0	0	0	0	0	0	0	0	1	政治	0	6	6	3	3	3	3	4	3	3	4	4	3	3	2	3	2	3	3	4	2	4	2	2	4	3	4	4	4	3	2	2	3
120	0	0	41	6	資格試験の合否	9	0	0	0	0	0	0	0	0	1	資格試験	0	6	3	6	5	4	3	2	2	3	1	1	1	4	1	1	3	4	4	4	1	4	1	1	4	5	5	5	5	3	1	1	4
182	0	0	42	6	近所のゴミ出し問題	9	0	0	0	0	0	0	0	0	1	近所付き合い	0	7	7	6	1	1	4	4	2	1	2	2	2	2	1	1	2	4	1	4	1	5	1	1	4	4	5	5	5	4	1	1	4
341	0	1	53	6	ボランティア活動をしている仲間の中の争いが有りました。５人である会の組織を手伝っているのですが、既に長年指揮をしている方が気に入らないのか、５人の中でも一番古くから手伝っている１名（その人には指揮を取る力は有りません）が喧嘩を売る形のメールをみんなに送ってきました。指揮されている方がそのメールでかなり落ち込み、その人と一緒にはこれ以上やっていけないと思い、辞めると言い出しました。私は指揮している方はしっかりやられていると思うし、そのボランティア活動には必要な人なので辞めないで欲しいと思うのですがどういう風に仲裁に入れば良いのか分からず数日寝不足になりました。今はコロナウィルスの問題もあるのでより気持ちが不安定になりました。	9	0	0	0	0	0	0	0	0	1	友人とはちょっと違いますが人間関係	0	7	7	2	1	1	3	3	2	1	5	5	2	3	3	3	2	4	4	3	2	4	2	2	3	3	4	4	4	3	2	2	3
389	0	1	39	6	隣家の人と、騒音問題に関するいざこざが続いていること。	9	0	0	0	0	0	0	0	0	1	ご近所との関係	0	6	6	5	2	2	2	2	2	2	1	1	2	1	1	2	1	1	2	2	2	4	1	2	4	4	4	5	4	3	4	2	3
24	0	0	44	6	風邪症状が治まらず息苦しさにコロナ感染を確信し、死の恐怖にもだえた経験が最大のストレスでした。	9	0	0	0	0	0	0	0	0	1	体調不良	1	7	7	6	3	4	5	4	2	3	2	3	2	4	1	3	4	4	3	2	2	2	2	2	5	1	4	4	4	1	4	4	4
38	0	1	45	6	新型コロナウイルスによるストレス	9	0	0	0	0	0	0	0	0	1	あまり外出ができないこと	1	7	7	6	2	4	4	2	4	3	3	3	4	4	3	3	3	4	3	4	3	4	2	2	4	3	3	4	4	3	1	1	4
374	0	0	29	6	新型のコロナウイルスの影響で趣味のサッカー観戦が中止になったこと。リーグ戦自体が中止されているので、試合映像も見ることが出来ずに、非常にストレスが溜まっている。	9	0	0	0	0	0	0	0	0	1	娯楽	1	6	7	1	1	1	2	3	2	1	2	3	2	2	3	2	2	3	2	2	4	2	2	3	3	2	2	4	3	3	2	1	3
390	0	1	43	6	コロナウイルスにまつわる様々な制限。特に子どもの学校の休校。	9	0	0	0	0	0	0	0	0	1	コロナウイルスにまつわる制限。	1	5	6	2	4	3	3	4	2	1	3	1	2	2	1	2	3	3	3	2	2	4	2	2	5	3	4	4	4	3	1	1	4
89	0	1	38	7	マンションの上の住人の立てる過剰な騒音	9	0	0	0	0	0	0	0	0	1	人間関係	0	7	7	2	2	3	5	4	2	3	5	5	2	4	2	3	3	5	4	3	4	4	2	4	4	3	2	4	2	2	4	2	2
209	0	0	31	7	プロ野球のシーズン開幕が延期されたことです。毎年シーズンの開幕は楽しみにしていただけに、今年は開幕が延期され、そもそもいつになったら開幕されるのか？というのが全く分からない状況のため、イライラしています。	9	0	0	0	0	0	0	0	0	1	趣味	0	6	6	1	2	1	2	3	2	2	1	1	1	2	1	1	1	2	2	2	4	1	4	4	2	3	2	2	2	2	3	1	3
147	0	0	73	7	新型コロナウィルスについてのストレスです。その中でも、マスクが購入出来ないことが腹立たしいです。転売屋という人達が、マスクを大量に買い占めて、それを高額で転売して金儲けをするのを見ていると、日本も終わりだなと実感しています。	9	0	0	0	0	0	0	0	0	1	衛生面	1	6	6	3	2	2	3	4	3	4	3	3	3	3	2	3	2	4	3	4	2	4	2	2	3	3	4	4	4	3	2	2	3
346	0	0	31	7	新型コロナの影響でトイレットペーパーが購入できなかったこと	9	0	0	0	0	0	0	0	0	1	生活面での不安	1	6	6	3	4	2	4	4	2	4	4	4	3	3	2	2	2	4	3	2	3	4	4	2	2	4	3	2	4	3	1	1	4
324	0	1	50	8	新しい場所に引っ越しして、周りに友達がいなくて寂しいですし、ネガティブな精神状態になったことがストレスでした。	9	0	0	0	0	0	0	0	0	1	新しい環境に馴染めない	0	6	5	5	4	4	4	4	3	3	3	3	3	4	3	3	4	4	3	4	3	4	3	2	4	4	3	3	4	3	3	1	4
29	1	1	43	2	I work from home and I find it to be a struggle to find quiet time to work. I live with my mother who is retired and she is a very nervous person who likes to jabber a lot. She has a table where she sits right behind me. Sometimes this causes issues while I'm trying to concentrate on work. There have been several instances where I have had to ask her to be a bit more quiet. She is quite emotional…	1	1	0	0	0	0	0	0	0	0		0	5	6	5	1	3	2	4	1	1	5	5	1	3	3	5	2	4	2	5	4	5	1	1	5	4	2	5	5	3	3	2	4
46	1	0	40	2	Family crisis	1	1	0	0	0	0	0	0	0	0		0	6	5	6	7	6	4	4	5	4	4	5	5	3	4	5	4	5	4	4	4	4	3	3	5	4	2	3	3	3	2	4	2
30	1	1	48	3	I found out that my teenage son, who has been depressed, was cutting himself, and had been thinking about suicide.	1	1	0	0	0	0	0	0	0	0		0	7	7	5	3	1	3	4	1	3	3	3	1	2	2	3	2	4	3	3	3	3	3	2	4	4	3	3	4	3	3	2	3
262	1	1	22	3	The biggest stressor I faced in the last 3 months was my personal relationship with my family. They sided with my ex in the divorce.	1	1	0	0	0	0	0	0	0	0		0	7	7	7	3	3	5	5	5	3	3	5	2	5	5	5	5	5	5	3	4	4	2	3	5	5	2	4	3	3	2	2	2
301	1	0	26	3	Having to care for my sick father while trying to juggle my own life was stressful and difficult.	1	1	0	0	0	0	0	0	0	0		0	7	3	1	3	1	3	4	3	3	4	2	1	3	1	5	2	3	2	5	2	4	3	1	4	5	4	3	5	3	3	1	3
384	1	1	61	3	I guess the most that I stress is when my oldest son does not know how to manage his money and is often needing our help and we are about to be retired.	1	1	0	0	0	0	0	0	0	0		0	4	6	1	6	7	1	4	3	5	1	1	4	4	1	2	1	5	3	4	2	4	2	2	4	5	4	4	4	4	1	1	4
392	1	0	74	3	a deadbeat stepson who doesn't work	1	1	0	0	0	0	0	0	0	0		0	5	6	1	3	2	4	3	2	3	4	4	1	3	5	3	3	4	2	3	3	4	4	3	4	3	3	2	3	3	2	3	3
459	1	1	45	3	I have an ongoing conflict with a family member. I hate it. I don't want to be in conflict. The problem is we never see eye to eye. We having wildly different views on the subject that will never change. It is a real source of stress for me.	1	1	0	0	0	0	0	0	0	0		0	6	7	2	1	1	3	3	2	2	2	3	2	2	3	2	2	3	3	4	2	2	3	2	4	3	4	3	4	2	4	3	1
461	1	0	40	3	I lost my grandfather last January. which was the biggest shock for I had. I love him so much. He was like my best friend. I spent my childhood with him. That time was really stressful event for me. I am never gonna forget him.	1	1	0	0	0	0	0	0	0	0		0	7	7	1	1	1	4	2	4	2	2	2	2	2	1	1	1	1	1	4	1	5	1	1	5	5	5	5	5	4	1	1	4
150	1	1	41	3	The biggest stressor has been the COVID-19 social distancing that has been happening around me. I have not been able to visit my mother for 3 weeks. I miss her very much and I wonder when I will be able to see her again.	1	1	0	0	0	0	0	0	0	0		1	7	6	1	1	1	1	1	2	5	1	1	3	3	1	1	1	1	1	5	1	5	1	1	5	5	5	5	5	4	1	1	4
206	1	0	44	3	Being stuck at home all day with my kids. Schools are closed because of covid 19. Kids are getting restless being cooped up.	1	1	0	0	0	0	0	0	0	0		1	5	5	1	1	1	1	1	1	1	1	1	1	1	1	1	1	1	1	4	3	4	2	2	4	4	3	4	4	2	1	1	4
363	1	0	69	3	The biggest stressor in last three months besides the horrible scary virus and worrying about my 92 year old mother. Also worried about catching it. Besides this is constant heart ache and regret over not treating my Grandmother very well. I lived with her the last two years of her life. She was sick and in and out of the hospital. I had much time with her and I never acknowledged her suffering. …	1	1	0	0	0	0	0	0	0	0		1	7	6	7	1	6	2	3	1	2	4	2	1	1	1	3	3	4	2	3	3	5	3	1	5	5	3	3	5	2	4	3	1
65	1	1	58	4	When we moved about two years ago to a new state my husband stated he would find a new job. I thought he should find a job first and then move. He still does not have a fulltime job and does consulting only.	1	1	0	0	0	0	0	0	0	0		0	7	7	5	2	2	5	5	1	5	5	4	1	4	3	5	5	5	4	1	3	3	4	2	3	2	3	2	4	2	2	3	3
77	1	1	62	4	My son is in Brazil, and not sure when or if he will come back. It is the hardest thing I have to deal with right not.	1	1	0	0	0	0	0	0	0	0		0	7	7	3	2	2	2	2	2	2	2	2	2	3	1	1	3	2	2	2	2	2	2	2	3	3	4	4	4	3	4	3	2
125	1	0	39	4	Last month my mom passed away from old age and i was pretty depressed and couldnt stop drinking for a few weeks. I didnt want to wake up and get dressed and had no motivation to do anything because i was feeling so bad. Luckily i have good friends who helped me out when i was feeling bad	1	1	0	0	0	0	0	0	0	0		0	7	7	1	2	2	3	2	2	4	4	1	4	2	1	1	1	4	5	5	1	5	1	1	4	5	5	5	5	4	1	1	4
180	1	0	58	4	I would say that the biggest stressor was trying to entertain some family members that had come for an extended visit. I wanted to make sure they had a good time and wasn't bored. It took some extensive planning and making arrangements to keep busy each week.	1	1	0	0	0	0	0	0	0	0		0	4	1	6	6	5	1	2	4	3	3	4	3	4	2	3	1	2	3	5	1	4	1	1	4	4	5	5	5	3	1	1	4
223	1	1	29	4	I was very stressed out over my aunt's health. She had to undergo chemotherapy and it was stressful because I didn't have the financial means to go and see her and she was very sick.	1	1	0	0	0	0	0	0	0	0		0	7	6	1	1	1	2	4	1	4	5	3	1	5	1	2	4	5	4	5	2	5	1	2	5	5	4	5	4	4	2	2	3
251	1	0	35	4	Mostly dealing with being locked inside my house with my two kids, aged 2 and 4, and my wife for the last 2 plus weeks.	1	1	0	0	0	0	0	0	0	0		0	6	6	1	1	1	1	3	2	4	2	2	1	3	1	3	1	4	4	4	4	4	1	1	4	4	2	5	5	4	1	1	4
256	1	1	64	4	My daughter was forced out of her apartment by eminent domain in a different state than I live in and had less than 45 days to find a new place to live.	1	1	0	0	0	0	0	0	0	0		0	5	7	1	7	1	1	3	2	3	1	4	1	2	1	1	1	3	1	3	2	4	3	1	4	3	4	3	5	3	1	1	1
54	1	0	29	4	My Fiance's father has 1 lung and a compromised immune system. Because of COVID-19, he is living with us. Constant worry about him, combined with working from home, is among the most very stressful I've ever encountered.	1	1	0	0	0	0	0	0	0	0		1	7	4	5	3	2	3	3	2	2	2	2	3	2	1	1	2	2	2	4	3	4	2	2	4	4	3	4	4	4	2	2	2
68	1	1	29	4	Fighting with my husband more than usual about making grocery shopping lists during this virus.	1	1	0	0	0	0	0	0	0	0		1	5	6	2	4	4	2	3	4	4	2	4	2	3	2	2	3	3	4	5	1	5	1	1	5	5	5	5	5	4	2	2	3
287	1	1	52	4	At the beginning of March, I was asking my 79 year old mother and her 82 year old husband to stay home due to this virus. My 82 year old stepfather has COPD, my Mom has diabetes. They resisted my efforts which stressed me out immensely, but they finally understand they need to stay home after a member of their church got sick.	1	1	0	0	0	0	0	0	0	0		1	7	7	3	3	1	2	1	1	3	2	2	1	1	4	1	1	2	3	5	1	4	2	1	4	4	5	4	5	4	1	1	4
300	1	1	19	4	The Coronavirus situation has caused me much stress lately. initially it was the idea of nit being able to complete this semester of college as I normally would (in person), especially as acceptance into my intended major is contingent upon my grades. However now I recognize that it is much more serious than that and I am more concerned about how my family will manage financially should one or bo…	1	1	0	0	0	0	0	0	0	0		1	6	7	2	1	3	2	1	1	3	2	3	1	3	1	4	3	3	4	3	3	4	1	2	4	3	3	5	4	3	2	2	4
379	1	1	35	4	My sister is currently pregnant and she and her husband decidd to have a sex reveal party. They got together with family for this, including family who do not currently live with them. Both my parents were in attendance and they are in the high-risk group for contracting Covid-19. No one was wearing a mask and there was no social distancing. I had to watch this from a recorded video as I live in …	1	1	0	0	0	0	0	0	0	0		1	7	5	2	4	1	4	4	3	3	4	3	4	4	2	2	3	4	3	4	2	4	1	1	5	5	4	5	5	3	2	1	4
463	1	0	57	4	My wife and I argued over her refusal to wear a mask or gloves while shopping. She said it wasn't necessary and I wanted her to be safe and take the extra precautions. She got upset and said I was overreacting and I argued that this is not a situation than rewards lack of reparation or taking proper precautions. She is at risk because of pre-existing health issue sand I want her to be safe.	1	1	0	0	0	0	0	0	0	0		1	5	7	3	1	1	2	2	2	3	1	1	1	2	1	2	2	2	2	4	3	4	3	1	3	4	3	3	5	3	2	2	3
33	1	1	55	5	My stepdaughter coming to us AGAIN for another 30 grand on top of 85 grand for college.	1	1	0	0	0	0	0	0	0	0		0	7	7	2	1	1	4	1	1	3	2	1	1	3	2	2	2	3	2	4	1	4	2	1	4	4	5	4	5	3	1	1	3
55	1	0	36	5	Currently the biggest stressor in my life, is dealing with a new child. Having a child has been amazing but it has also been very disruptive and has lead to additional stress.	1	1	0	0	0	0	0	0	0	0		0	6	3	6	4	5	4	3	4	4	3	2	4	4	3	4	3	4	4	4	4	4	4	4	2	3	2	2	2	4	2	3	3
59	1	0	48	5	my MIL is married to a man who was once arrested (but charges dropped) for molesting a child under 6 years old. He is a terrible man, and I have any number of bad encounters with him over the years. He was basically destitute when they started dating, and he is mooching off her. This is an ongoing stressor that I have a hard time dealing with. I've basically cut him off, but everyone else is play…	1	1	0	0	0	0	0	0	0	0		0	6	7	2	1	1	3	3	1	4	3	3	2	2	3	4	3	4	4	4	2	4	2	2	4	4	4	4	4	3	3	3	3
60	1	0	27	5	probably my brother stating with us, he's moving to our state and is staying with us for awhile. it's been super stressfull because we don't see eye to eye on anything, he's set in his ways and so are we.	1	1	0	0	0	0	0	0	0	0		0	6	6	4	4	4	3	3	2	4	4	4	4	4	1	3	3	4	4	4	2	4	1	1	5	4	4	5	5	1	3	2	4
209	1	1	24	5	In the last three months, the biggest stressor I faced was an argument with a family member. The family member was concerned about not being picked to stay in our home when our second child arrived.	1	1	0	0	0	0	0	0	0	0		0	7	7	2	3	3	2	3	1	2	3	1	1	3	1	2	2	4	2	5	2	5	1	1	4	5	4	5	5	3	1	1	4
221	1	0	48	5	My wife left me for another guy 18 months ago, but then reconsidered and returned to the marriage 3 months later. Nonetheless, we are still struggling with the after effects of that, and that is by far the biggest stressor on my life. Just the day to day trying to navigate how to trust again, and how to forgive, and how to avoid strife.	1	1	0	0	0	0	0	0	0	0		0	7	7	1	4	1	3	2	1	2	2	2	1	2	2	1	1	1	2	3	1	4	1	1	4	4	5	5	5	3	2	1	2
303	1	0	37	5	Biggest stress right now is raising my little kids. Full of energy and always getting into stuff.	1	1	0	0	0	0	0	0	0	0		0	5	4	5	4	4	3	4	4	3	4	2	3	3	1	2	2	2	3	4	1	4	1	1	5	5	5	5	5	4	3	3	3
309	1	1	35	5	My biggest stress over the last three months (apart from COVID-19) has been family issues. My brother has been struggling with drug addiction in South America and has recently come home and had nowhere else to go but my place. So he has been here, recovering and trying to rebuild his life. It's a big stress for me emotionally.	1	1	0	0	0	0	0	0	0	0		0	7	5	1	5	2	4	5	2	5	5	4	2	5	4	4	3	5	4	4	1	3	3	1	5	5	5	3	5	4	3	2	3
343	1	1	49	5	The biggest stressor recently has been that my daughter and her kids, my grandkids have moved here. I am not used to having little kids around anymore and it's been hard and stressful to adjust to a new schedule so that I can spend time with them or watch them as needed.	1	1	0	0	0	0	0	0	0	0		0	4	1	1	5	5	3	2	1	3	4	1	1	4	1	2	1	4	2	2	3	4	2	1	2	1	3	4	5	3	1	1	4
414	1	0	38	5	in my house there is a lot of stress due to personal problems	1	1	0	0	0	0	0	0	0	0		0	5	5	4	4	5	3	3	3	3	2	3	2	3	2	2	2	2	2	4	4	4	4	4	3	3	2	2	2	3	2	3	3
447	1	0	29	5	In case I have been stressed for not leaving my house, regarding what is happening here in the world, not being able to know if my family is well has me worried about whether on many occasions	1	1	0	0	0	0	0	0	0	0		0	3	4	4	3	3	3	2	2	3	2	3	2	3	2	3	3	3	2	2	3	3	3	3	4	3	3	3	3	2	3	2	3
456	1	0	31	5	My biggest problem in the last three months have been family related issues.	1	1	0	0	0	0	0	0	0	0		0	7	5	6	7	6	1	4	3	5	4	2	3	4	1	4	4	5	5	5	2	5	1	1	4	5	4	5	5	2	1	1	3
110	1	0	47	5	My biggest stressor is trying to get my mom to go to the doctor because she has been dealing with some health issues for over 6 months. She refuses to go, and I am extremely worried about her. I know it's not coronavirus, but the fact that she already is sick she very well could be more susceptible to the virus.	1	1	0	0	0	0	0	0	0	0		1	7	7	1	1	1	1	1	1	1	1	1	1	1	1	1	1	2	1	5	1	4	2	2	5	5	5	4	4	3	1	1	4
216	1	1	28	5	My alcoholic mother spiraling due to stress from COVID 19. This caused a huge rift in my family and strain on my relationship with my mom.	1	1	0	0	0	0	0	0	0	0		1	7	7	2	1	3	5	5	5	4	5	5	5	5	5	5	4	4	3	5	1	5	3	4	4	5	5	3	2	4	3	3	3
347	1	0	29	5	In case I am worried and stressed in almost everything about the situation that the world is going through right now with the pandemic, I feel more concerned about my family that is far away and that they may not have the necessary resources for this problem that is Is living.	1	1	0	0	0	0	0	0	0	0		1	3	2	3	2	2	3	2	3	3	4	3	2	4	3	2	3	2	3	2	3	3	3	3	4	3	3	3	3	2	3	2	2
39	1	1	58	6	Having both college students move back for at home study. We also don't have most of their things moved back so must wait to find out when we can do that.	1	1	0	0	0	0	0	0	0	0		0	7	3	1	3	1	1	2	2	2	3	4	2	3	2	2	1	3	1	5	1	5	1	1	4	4	5	5	5	3	2	2	2
127	1	0	18	6	Family issues and grandparent death.	1	1	0	0	0	0	0	0	0	0		0	6	6	2	4	3	3	4	2	4	4	3	2	3	2	2	2	4	2	3	2	4	3	2	2	2	4	3	4	2	3	3	2
196	1	0	18	6	A time when one of my family members used my debit card without my permission and used all of my saved up money.	1	1	0	0	0	0	0	0	0	0		0	5	7	1	6	5	4	3	4	4	4	5	3	4	2	2	4	4	3	4	2	4	4	4	5	5	4	2	2	3	2	2	1
218	1	0	37	6	My biggest stressor has been finding someone to watch our kids while we work. We usually use daycare to watch our children, but as of 2 weeks ago, our daycare has closed. We needed to find someone we trusted and that was available to watch our kids.	1	1	0	0	0	0	0	0	0	0		0	6	6	2	6	3	1	1	1	3	3	1	3	2	1	1	2	2	2	2	2	4	4	4	3	3	4	2	2	3	2	1	4
267	1	0	37	6	My father has contracted an auto-immune disease and needs special care.	1	1	0	0	0	0	0	0	0	0		0	6	7	1	3	3	2	2	1	1	3	3	1	4	1	1	1	5	1	5	2	5	2	1	4	5	4	4	5	3	2	1	4
322	1	1	34	6	Homeschooling my severely ADHD child has been one of my biggest stressors these past few weeks. He is defiant, and gets frustrated and cannot focus. It causes me anxiety to think about having to force him to do his assignments each day.	1	1	0	0	0	0	0	0	0	0		0	5	5	5	2	2	1	2	1	4	2	2	1	1	1	1	2	1	3	4	2	4	1	1	3	4	4	5	5	2	3	3	2
345	1	1	70	6	My oldest daughter age 51 feels that she was abandoned and is not speaking to me.	1	1	0	0	0	0	0	0	0	0		0	5	7	4	1	1	1	5	1	1	1	3	1	5	1	1	3	5	1	2	2	5	2	1	5	2	4	4	5	3	2	2	4
364	1	1	57	6	I have a son with Aspergers Autism. Every day is stressful. We have to be so careful in what we say. He does not understand joking.	1	1	0	0	0	0	0	0	0	0		0	7	7	1	4	4	2	1	1	3	2	1	1	1	1	1	1	1	1	4	1	4	1	1	4	5	5	5	5	3	2	2	3
417	1	0	40	6	Trying to balance home life with the demands of my job. Needing to get a project done for work, but my wife felt I needed to be at home.	1	1	0	0	0	0	0	0	0	0		0	7	7	7	4	2	4	2	2	3	4	3	2	2	4	4	4	3	3	3	3	5	3	2	3	2	3	3	4	4	1	2	3
443	1	0	29	6	A few days ago I had a fight with my younger brother, it was something unpleasant because I had to scold him very hard for disobeying my mother a lot, it was a very strong argument.	1	1	0	0	0	0	0	0	0	0		0	6	6	1	6	6	3	3	2	4	3	2	3	3	3	2	3	3	3	5	3	4	3	2	3	3	3	3	4	3	1	1	2
32	1	1	54	6	I live with my adult son who struggles with depression, anxiety and substance abuse. He is a student and was working hard and doing well when college was canceled due to corona virus, and without that structure he sunk back into a dark period.	1	1	0	0	0	0	0	0	0	0		1	6	6	3	3	3	4	4	2	4	4	2	2	4	3	5	4	4	4	4	3	4	2	2	4	3	3	4	4	4	3	3	2
38	1	1	42	7	My estranged relationship with my sister and her family becuse her husband tried to expose his penis to me in 2010.	1	1	0	0	0	0	0	0	0	0		0	7	7	1	1	1	2	3	2	5	2	2	1	2	2	3	3	2	4	3	3	3	3	3	3	3	3	3	3	2	1	1	3
149	1	0	64	7	My wife is fighting with her mother. As a result, we have not been able to visit her, nor have our children been able to see their grandmother.	1	1	0	0	0	0	0	0	0	0		0	5	7	1	1	3	1	4	1	5	3	1	1	4	1	1	1	1	3	5	2	5	1	1	5	4	4	5	5	4	1	1	4
403	1	1	60	7	Interactions with my husband about selling our home and moving into one that requires less outside maintenance. He's resisting because our house is paid for and has been nearly fully upgraded. We won't find a similar house at a comparable price.	1	1	0	0	0	0	0	0	0	0		0	5	4	7	1	3	1	3	1	2	3	2	2	3	4	1	1	4	1	2	4	5	3	2	4	3	2	3	4	4	2	1	4
15	1	1	23	7	The biggest stressor I have faced is definitely the uncertainty over the coronavirus situation. I am now having to work at home. I live with my parents so it is difficult trying to work from home while they are here as well because they are extremely noisy and do not respect the fact that I need quiet time to work. It is causing me a lot of stress because the hours I am able to work have already …	1	1	0	0	0	0	0	0	0	0		1	6	7	3	1	1	3	5	1	2	3	2	1	5	1	1	2	5	2	5	1	4	1	1	5	5	5	5	5	2	3	2	3
69	1	1	51	7	It's been quite stressful to navigate my mother and her worrying actively about COVID-19 and my dad. She is starting to have cognitive difficulties and my dad is aged and has significant reduced cognitive function already which isn't new, but the difficulties in my mother are new, and trying to take care of both of them is hard and trying to work through her confusion and frustration and figuring…	1	1	0	0	0	0	0	0	0	0		1	6	5	6	4	2	4	3	1	1	2	1	1	3	1	1	1	2	2	5	1	4	1	1	3	3	5	5	5	3	4	4	1
376	1	1	67	7	only stressful thing I have had is being so far away from my 2 children and all my grandchildren. They live in Georgia and my husband and I live in New Jersey. Wishing I could be closer to them in this time of the coronavirus. Also my husband is still working and I worry that he will bring home the virus.	1	1	0	0	0	0	0	0	0	0		1	4	1	1	1	1	1	4	1	3	4	1	2	4	1	1	1	2	3	5	1	4	3	1	4	5	5	3	5	4	1	1	1
106	1	1	39	8	The fact that my mother and my husband don't get along and we all live together. She is always talking bad about him which makes us fight.	1	1	0	0	0	0	0	0	0	0		0	7	7	1	1	1	2	2	2	2	5	3	2	4	1	1	1	3	1	3	4	2	2	3	3	4	2	4	3	2	3	3	1
112	1	1	36	8	My brother is 38 years old and has autism. He lives on his own but I am constantly having to help him. Every time he calls me there is a sense of dread.	1	1	0	0	0	0	0	0	0	0		0	7	7	1	5	7	2	1	3	2	1	2	2	1	1	1	1	2	1	5	2	5	1	1	4	4	4	5	5	4	2	1	4
177	1	1	59	8	I would say the biggest stressor has been my widowed father. He lives in the next state and I feel a responsibility to be sure to visit him as often as possible. With my work schedule, it is not always easy to find the time to be with him. Also, we are very different people, so the things we can do together are limited.	1	1	0	0	0	0	0	0	0	0		0	5	3	5	6	5	2	1	2	2	3	3	2	2	1	3	2	2	2	5	3	3	3	2	5	5	3	3	4	3	2	2	3
260	1	0	35	8	The biggest stressor is having my kids daycare closed while I am trying to work from home.	1	1	0	0	0	0	0	0	0	0		0	7	4	1	6	1	1	1	1	2	1	1	1	1	1	1	1	1	1	2	4	2	4	3	1	2	2	2	3	2	3	1	4
332	1	1	63	8	My husband left me 20 years ago, and it upsets me when he comes by and ignores my decision that he leave me alone.	1	1	0	0	0	0	0	0	0	0		0	6	6	3	2	2	4	3	2	3	3	3	2	3	2	3	3	3	3	3	3	2	2	2	3	3	3	4	4	3	2	2	2
370	1	1	55	8	My mother has dementia and when my father died, I moved her cross country to a nursing home near me, since she had no family left in her area. But I never got along with her, she was abusive to me (but no longer is), she grosses me out and I visit 3 times a week but I can't stand it.	1	1	0	0	0	0	0	0	0	0		0	6	7	5	2	2	1	4	2	3	1	1	1	3	1	3	2	4	2	2	2	4	4	2	2	3	4	2	4	2	4	4	2
88	1	0	44	8	Arguing with my baby boomer parents who thought coronavirus was a hoax because Trump downplayed it.	1	1	0	0	0	0	0	0	0	0		1	3	3	1	1	1	1	1	1	1	1	1	3	1	1	1	1	2	1	5	1	5	1	1	5	5	5	5	5	2	1	3	3
215	1	1	62	9	My brother informed the family he had bought land from my elderly aunt. He paid 20% of what the land was worth, and told family he paid fair market value for it. The land was supposed to be inherited by the two of us when she passed.	1	1	0	0	0	0	0	0	0	0		0	7	7	1	1	1	1	1	1	1	1	1	1	1	1	1	1	1	1	5	1	5	1	1	5	5	5	5	5	3	2	1	4
283	1	1	21	3	My best friend of 18 years slept with my eldest brother	2	0	1	0	0	0	0	0	0	0		0	5	7	1	3	2	4	4	2	4	5	4	2	4	2	5	4	4	4	3	2	4	2	2	3	4	4	4	4	3	3	3	2
178	1	0	25	5	It was actually around five years ago when all this went down. when my very best friend came to me and told me she had to have brain surgery in 3 weeks. I have never freaked out about something so much or stressed so hard in my life.	2	0	1	0	0	0	0	0	0	0		0	7	7	1	1	1	3	3	3	3	3	3	3	3	3	3	3	3	3	2	2	2	2	2	2	2	4	4	4	3	3	3	3
425	1	0	34	5	With the current problem that we are experiencing, my greatest stress is not being able to go out and do social life normally, I am at home and I am anxious that everything ends soon	2	0	1	0	0	0	0	0	0	0		0	5	3	2	2	1	4	1	3	4	3	1	3	4	5	2	3	1	3	2	5	4	5	4	2	5	1	1	2	1	2	3	4
469	1	0	29	5	problem family	2	0	1	0	0	0	0	0	0	0		0	4	5	3	6	5	4	4	3	4	3	4	3	4	3	3	3	2	3	3	3	3	3	3	4	3	3	3	3	3	2	3	3
242	1	0	18	6	A feud with some of my online friends and ex girlfriend.	2	0	1	0	0	0	0	0	0	0		0	7	7	3	3	2	5	5	5	5	5	4	1	5	1	5	5	5	5	1	2	4	5	1	2	3	4	1	5	3	3	4	1
452	1	1	29	6	3 days ago I had a very strong problem with my neighbor since he wanted to throw his trash in my house, it was very strong because he was hiding it.	2	0	1	0	0	0	0	0	0	0		0	6	6	1	4	5	3	4	2	3	3	3	4	3	3	3	2	3	3	2	2	2	3	2	3	4	4	3	4	3	1	1	2
181	1	1	46	7	About a month ago a very good friend of mine was in the hospital for liver failure. This is someone I have known for over ten years, we lived together for a few years, and I swear sometimes we can read each other's minds. We are close. Last year he had been hospitalized for the same thing and given three months to live, so ut was definitely a scary situation.	2	0	1	0	0	0	0	0	0	0		0	7	7	4	4	2	4	3	1	2	2	2	2	2	2	3	3	4	2	4	2	4	2	2	4	4	4	4	4	4	3	2	4
362	1	1	19	8	My biggest stressor would probably be a fight I got into with one of my closest friends. While it was a quick fight over text it really impacted me and stressed me out for about a month.	2	0	1	0	0	0	0	0	0	0		0	5	6	6	4	5	4	4	1	4	2	2	2	4	1	3	2	3	4	5	2	4	2	1	4	4	4	4	5	3	2	1	3
247	1	1	25	8	Living with a roommate who has autism and OCD has probably been the biggest stressor in the past three months, especially because of the pandemic. The accumulation of small but invasive and uncomfortable things makes it very difficult to live with her, and I am constantly in fear of what she will do.	2	0	1	0	0	0	0	0	0	0		1	6	6	3	2	3	2	4	1	2	3	2	1	4	2	4	4	4	4	5	1	4	1	2	4	4	5	5	4	3	3	3	3
85	1	0	23	2	Recently, my girlfriend and I got into a bit of a spat and separated. Over time, we've been fighting constantly, but also doing our best to reconcile with one another.	3	0	0	1	0	0	0	0	0	0		0	5	5	3	2	5	1	4	2	4	3	3	2	5	1	2	4	3	3	3	3	4	4	1	3	5	3	2	5	3	1	1	4
52	1	0	48	3	I kept having dreams that my wife was fooling around with someone else. There was no evidence to support this claim, and I knew that it wasn't true, but the dreams were bothersome and created a great deal of friction in our relationship.	3	0	0	1	0	0	0	0	0	0		0	5	7	6	6	4	3	3	2	4	4	3	2	3	3	3	4	3	4	2	3	2	3	3	3	3	3	3	3	3	3	3	2
182	1	0	29	3	My relationship of about a year ended with my girlfriend.	3	0	0	1	0	0	0	0	0	0		0	6	7	3	1	1	1	2	3	3	3	1	3	3	1	3	2	4	1	3	2	4	2	2	4	4	4	4	4	3	3	3	3
352	1	0	23	3	With the recent occurrences of Covid-19, the relationship between myself and my partner have become strained at times, because she is quite paranoid about the issue, and with my low self-esteem, I snapped at her, thinking that she didn't appreciate what I was doing to make her feel comfortable in these troubling times.	3	0	0	1	0	0	0	0	0	0		0	6	5	6	7	3	4	3	2	4	3	3	1	3	4	4	4	4	2	2	3	3	5	1	5	3	3	1	5	3	1	1	4
333	1	0	25	4	Relationship issues with freedom problems tied into it.	3	0	0	1	0	0	0	0	0	0		0	5	4	4	2	2	2	3	1	2	2	2	1	2	1	3	1	2	2	3	3	3	2	3	2	4	3	4	3	3	3	2	2
79	1	0	41	5	breakup with girlfriend and particularly not being able to get intrusive thoughts about her out of my head and concentrate on other things	3	0	0	1	0	0	0	0	0	0		0	7	6	2	1	1	4	4	2	2	3	2	1	1	1	1	1	1	1	4	5	4	1	1	5	4	1	5	5	2	4	4	2
203	1	0	36	5	worrying that i got a girl pregnant. it would be a terrible to time to have a kid and i really dont know her. i was stupid again and it is super stressful	3	0	0	1	0	0	0	0	0	0		0	6	6	6	6	6	1	1	1	2	1	1	1	1	1	1	1	1	1	4	2	4	2	2	4	4	4	4	4	3	2	2	3
183	1	1	24	5	In early February I started taking the potential for this pandemic very seriously. My boyfriend was in his home country awaiting his visa confirmation in order to come back and start work officially. He wasn't taking it as seriously which stressed me out to the point where I told him if he didn't smarten up then he shouldn't come back because it will just put us both at risk.	3	0	0	1	0	0	0	0	0	0		1	5	7	5	5	5	4	4	1	5	4	4	1	3	1	5	4	3	5	3	4	5	3	2	5	3	2	3	4	3	4	3	3
96	1	1	32	6	differences in belief with my spouse	3	0	0	1	0	0	0	0	0	0		0	7	7	2	2	2	4	3	1	1	1	3	1	4	2	4	5	4	2	3	2	4	2	1	4	4	4	4	5	2	2	3	3
114	1	1	46	6	Finding out that my husband has 30,000 dollars in credit card debt that he did not tell me about.	3	0	0	1	0	0	0	0	0	0		0	7	7	1	2	1	4	2	1	3	3	2	2	2	1	2	2	3	3	5	2	4	4	1	4	2	4	2	5	3	2	2	2
176	1	0	21	6	I thought my girlfriend was pregnant	3	0	0	1	0	0	0	0	0	0		0	7	7	6	7	3	2	3	3	4	1	1	2	4	2	2	1	4	1	4	1	5	1	1	4	4	5	5	5	4	2	1	4
226	1	0	38	6	I have had financial difficulties as well as relationship issues. They both play an equally detrimental effect and I am unable to form close intimate relationships and I do not have enough money to fly out to Vegas and get a hooker! Lol	3	0	0	1	0	0	0	0	0	0		0	5	7	7	1	4	2	5	1	5	4	1	1	5	1	5	5	5	5	3	3	4	3	3	3	4	3	3	3	2	4	4	2
272	1	1	39	6	Being able to cohabitate with my boyfriend	3	0	0	1	0	0	0	0	0	0		0	5	5	5	3	3	4	4	3	3	3	3	3	3	1	2	3	3	3	4	3	4	2	2	4	4	3	4	4	4	2	2	4
316	1	0	41	6	By far the biggest stressor has been the legal trouble my fiance has found herself in, ridiculously over blown minor issues turned into jail and thousands of dollars quickly, not cool at all.	3	0	0	1	0	0	0	0	0	0		0	7	5	2	6	2	5	4	1	1	2	5	1	5	1	2	3	5	1	5	1	5	1	1	5	4	5	5	5	3	3	4	2
468	1	1	26	6	I broke up with my boyfriend of two years that I lived with and had to move back in with my parents	3	0	0	1	0	0	0	0	0	0		0	7	4	3	1	3	3	3	1	4	3	2	2	2	4	3	4	3	3	2	2	4	3	3	3	3	4	3	3	3	3	2	2
2	1	1	37	7	Marriage	3	0	0	1	0	0	0	0	0	0		0	5	5	5	7	3	1	5	1	5	4	4	1	3	1	4	4	4	5	4	4	5	2	1	2	5	2	4	5	3	4	4	1
166	1	1	43	7	Romantic relationship that ended	3	0	0	1	0	0	0	0	0	0		0	6	4	4	4	3	4	4	1	1	3	2	1	1	1	1	1	2	1	5	2	5	2	3	5	5	4	4	3	4	3	3	1
179	1	1	31	7	I have a lot of stress dealing with an ongoing relationship.	3	0	0	1	0	0	0	0	0	0		0	6	5	6	1	2	5	5	1	5	5	2	1	5	2	5	5	5	5	5	1	5	1	1	5	5	5	5	5	3	4	4	1
238	1	0	26	7	The biggest stressor I've had in the past few months is finally having to decide between two girls and which one I wanted to actually be with. I was already dating one for 8 years and had been talking to the other for 3 years.	3	0	0	1	0	0	0	0	0	0		0	7	4	7	7	7	4	3	4	4	3	4	4	3	3	3	3	4	4	2	5	3	4	4	2	2	1	2	2	3	2	2	3
280	1	1	53	7	Very ugly breakup with my boyfriend.	3	0	0	1	0	0	0	0	0	0		0	7	7	4	7	7	1	1	1	1	2	1	3	1	1	1	1	2	1	1	5	3	5	5	1	1	1	1	1	3	4	4	3
339	1	0	37	7	My wife's lack of a sex drive.	3	0	0	1	0	0	0	0	0	0		0	6	6	1	1	2	2	2	1	1	2	1	1	2	2	2	3	2	2	2	3	3	3	2	3	3	3	3	4	3	2	2	3
353	1	1	57	7	My husband and I separated on our way to getting divorced. It is the most stressful thing that I have ever undergone, and I am still in the middle of it.	3	0	0	1	0	0	0	0	0	0		0	7	5	5	3	4	2	3	2	2	3	2	2	2	1	1	3	3	3	5	2	4	2	2	5	5	4	4	4	4	2	2	4
9	1	1	26	7	I could not get married due to corona virus. This was stressful due to cancellation costs and lost money along with being upset about not being able to get married.	3	0	0	1	0	0	0	0	0	0		1	6	7	1	1	1	4	4	3	4	3	3	3	2	2	2	2	4	2	2	3	3	3	3	2	2	3	3	3	2	2	3	2
28	1	1	24	8	The biggest stressor that I faced was breaking up with my girlfriend. It was unwanted, horrific, and so so sad.	3	0	0	1	0	0	0	0	0	0		0	7	7	7	3	3	4	3	3	3	2	2	1	3	4	4	4	4	3	5	2	5	2	2	5	5	4	4	4	4	2	2	4
159	1	0	33	3	The biggest stress encountered in the previous few months would be a final exam in a Master's Business Law course. It was my final course before completing my degree and I had straight As at that point, so I wanted to maintain it. However the final exam was worth 70% of the grade and the only exam for the semester. I did my best to learn about it to minimize the stress and then prepare accordingl…	4	0	0	0	1	0	0	0	0	0		0	7	1	7	7	6	2	4	1	5	4	5	2	5	2	5	4	5	4	5	5	5	5	4	1	4	1	1	2	2	3	3	3
329	1	0	20	3	Dropped out of school	4	0	0	0	1	0	0	0	0	0		0	6	7	7	3	2	4	5	2	5	4	2	1	5	3	4	5	5	5	3	3	3	3	2	4	5	3	3	4	2	4	4	1
318	1	0	24	4	The biggest stressor I have faced is completion of my doctoral degree	4	0	0	0	1	0	0	0	0	0		0	5	1	5	5	6	1	3	1	4	2	1	3	2	3	2	3	2	3	3	3	4	3	3	2	2	3	3	3	3	1	1	4
330	1	1	23	4	A few year ago I left a majority of my papers untouched til the end of the semester and ended up writing nine papers in three weeks. Fortunately I got all A's and B's. I'm lucky I didn't get points taken off for being late. I was already on probation from fall semester so I had no room to screw up.	4	0	0	0	1	0	0	0	0	0		0	5	5	5	5	5	4	4	4	4	4	4	4	4	4	4	4	4	4	1	1	1	1	1	1	1	5	5	5	2	2	2	3
457	1	1	27	4	My biggest stressor over the last 3 months has been school-related. I am in a relatively difficult degree and it requires a huge amount of time and effort. I had this one portfolio project that required hundreds of hours of work.	4	0	0	0	1	0	0	0	0	0		0	6	5	6	4	4	2	2	1	1	2	1	3	1	1	1	1	2	1	5	1	5	1	1	5	5	5	5	5	4	1	1	4
18	1	1	21	5	Test at college	4	0	0	0	1	0	0	0	0	0		0	7	5	7	6	6	3	4	4	4	3	4	5	5	5	4	4	5	4	3	3	3	5	3	3	4	3	1	3	3	3	2	2
104	1	1	19	5	School is currently the biggest stressor of my life as I'm in a really hard and competitive major.	4	0	0	0	1	0	0	0	0	0		0	7	2	4	3	4	1	1	1	4	2	1	3	2	1	1	1	1	1	4	1	5	1	1	5	5	5	5	5	3	3	2	3
202	1	1	23	5	PhD interviews	4	0	0	0	1	0	0	0	0	0		0	6	2	6	6	5	3	2	1	4	3	1	2	1	1	1	1	3	3	4	2	5	2	1	3	2	4	4	5	3	3	2	3
375	1	0	20	5	The biggest stressor that I faced over the last three months was an exam in one of the most difficult accounting courses at my university. I spent hours each day leading up to that exam studying and reviewing all the material. I frequently felt like giving up and crying, but ultimately I pushed through it.	4	0	0	0	1	0	0	0	0	0		0	5	4	6	6	4	2	4	3	4	4	3	2	5	2	3	1	3	4	3	2	3	2	2	3	4	4	4	4	3	3	4	2
340	1	0	44	5	Dealing with school closing due to the coronavirus	4	0	0	0	1	0	0	0	0	0		1	5	5	1	1	1	1	1	1	1	1	1	2	1	1	1	1	1	1	4	2	4	2	1	4	4	4	4	5	3	1	1	4
334	1	1	19	6	I've had to move to online classes and move back home where everything is loud and chaotic	4	0	0	0	1	0	0	0	0	0		0	5	3	1	1	1	5	5	1	5	5	4	1	5	4	5	5	5	5	4	2	5	4	1	4	4	4	2	5	3	4	3	4
411	1	0	21	6	I remember my first year at university, it was one of the worst times, everything was new to me, a new system I did not adapt for a while and the first semester was specifically the worst. I couldn't make any friends, i felt no one liked me, and for the first time that I passed with the worst marks.	4	0	0	0	1	0	0	0	0	0		0	7	7	7	3	1	1	3	3	5	3	1	2	3	1	2	3	2	5	4	1	4	1	1	3	3	5	5	5	2	4	3	1
439	1	0	19	6	When I had driving lessons, I used to get very stressed.	4	0	0	0	1	0	0	0	0	0		0	7	3	7	6	4	4	2	2	3	1	1	2	1	1	1	1	3	1	2	4	4	4	2	2	2	2	2	4	3	2	2	3
76	1	0	22	6	The biggest stressor has been related to my schooling. My major is difficult, and now moving to online classes in light of COVID has been a challenging transition on top of an already rigorous major.	4	0	0	0	1	0	0	0	0	0		1	6	4	1	4	1	1	3	1	4	2	1	1	3	1	2	2	4	3	2	3	3	3	3	3	4	3	3	3	2	1	1	4
220	1	0	18	6	When COVID-19 came to the United States, the university that I attend completely shut down and moved to online classes for the rest of the school year. Although I have gotten more used to this form of learning now, it was very difficult at first. I do not learn well through distance learning, nor did I have access to all the resources I needed at home. This was combined with still upcoming deadli…	4	0	0	0	1	0	0	0	0	0		1	7	3	1	4	2	1	1	1	4	1	1	2	1	1	3	2	5	3	5	1	5	2	1	5	5	5	4	5	4	2	1	4
128	1	0	32	7	The biggest stressor that I have faced are concerns about my son and if he should redo preschool.	4	0	0	0	1	0	0	0	0	0		0	7	5	4	1	4	1	1	1	1	1	1	1	1	1	1	1	1	1	5	1	5	1	1	5	5	5	5	5	4	1	1	4
244	1	1	36	7	I work full-time, but am also back in school. I had to pass a major test in school to move on to the next step involving a written and oral exam. It was very stressful preparing for this and did not sleep well and my stomach hurt often.	4	0	0	0	1	0	0	0	0	0		0	7	6	6	7	6	2	2	3	3	2	2	2	2	2	4	2	3	2	4	3	4	4	2	4	5	3	2	4	3	4	3	3
271	1	1	18	7	My teacher wouldn't accept one of my papers, without it I can't graduate this spring. It worked out and I'll be graduating but it was very stressful.	4	0	0	0	1	0	0	0	0	0		0	6	6	7	7	3	2	2	1	3	2	2	2	1	2	1	2	2	1	3	4	3	2	2	5	2	2	4	4	3	3	2	4
245	1	0	30	8	I am a graduate student in the field of audiology. The biggest stressor in my last three months is that both of my clinic placements have been in pediatric audiology settings. I do not want to work with kids in my future career, and it's not something I feel good at, so that's stressful	4	0	0	0	1	0	0	0	0	0		0	5	5	2	5	5	1	4	1	3	1	3	1	2	1	2	2	3	2	2	4	3	4	3	2	2	2	2	3	4	1	1	4
158	1	1	20	8	The biggest stressor I've faves in the last three months is having to leave university due to COVID-19. I had been on spring break and just got back into the normal routine at campus. Now I'm back home taking my classes online for the rest of the semester. I have a hard time learning material online and miss seeing all of my friends. The change is overwhelming.	4	0	0	0	1	0	0	0	0	0		1	7	7	1	1	1	2	2	1	1	1	1	2	1	1	2	1	2	1	5	1	5	1	1	5	5	5	5	5	4	1	1	3
138	1	0	41	1	My biggest stress was my car accident injury. Though it's not heavy but i got hurt on my back and still suffering from that event.	5	0	0	0	0	1	0	0	0	0		0	7	7	7	6	1	4	5	1	5	1	3	1	3	1	1	1	1	1	5	1	1	2	1	5	4	5	4	5	4	1	1	1
440	1	0	25	2	coronavirus - its a virus currently impacting the world. everything is shutting down.	5	0	0	0	0	1	0	0	0	0		1	7	7	1	1	1	2	3	1	4	4	4	1	5	1	3	3	5	3	5	1	5	2	1	4	5	5	4	5	3	2	2	3
143	1	0	32	3	My wife and I had a newborn in early march; with everything going on in the world we have to constantly worry about him becoming I'll and hospitalized	5	0	0	0	0	1	0	0	0	0		0	5	3	7	1	3	4	1	2	2	2	1	2	1	1	1	1	4	1	5	2	4	2	2	4	4	4	4	4	4	1	1	4
240	1	1	26	3	I've always had mild anxiety but a few months ago I started to experience very bad anxiety that would often manifest physically. I was dealing with an almost constant increased heart rate, headaches, brain fog, etc., and no doctors were really able to figure out that it was my anxiety causing it for months and just kept telling me nothing was wrong. I had to go see multiple specialists, and have …	5	0	0	0	0	1	0	0	0	0		0	7	6	5	4	2	3	2	1	3	2	3	2	2	1	2	1	4	1	3	3	3	3	3	2	3	3	3	3	3	3	1	4
288	1	1	40	3	The biggest stressor that I face right now is my health, both physical and mental. I need to tackle these things but they seem so overwhelming and they've remained the same for years now. The physical health aspect is going to kill me and I am letting it happen.	5	0	0	0	0	1	0	0	0	0		0	7	7	7	1	3	5	5	5	5	5	4	4	4	1	1	1	5	2	3	2	5	3	1	3	5	4	3	5	1	4	1	4
412	1	1	60	3	injury	5	0	0	0	0	1	0	0	0	0		0	7	7	3	3	1	3	4	3	4	4	4	3	4	1	3	2	4	3	3	3	4	2	2	4	3	3	4	4	3	2	2	4
431	1	0	22	3	Dealing with my mental health issues, anger, anxiety, depression, that caused my relationships with my family and friends to suffer.	5	0	0	0	0	1	0	0	0	0		0	5	7	7	3	1	5	4	4	2	3	3	3	4	2	4	5	4	3	1	2	2	3	3	2	2	4	3	3	2	4	3	2
169	1	1	29	3	The biggest stressor over the last three months has been my constant worry that I will contract the coronavirus and give it to my fiancée, as he is a diabetic.	5	0	0	0	0	1	0	0	0	0		1	6	6	6	3	3	3	4	2	4	3	4	1	4	3	4	3	5	3	5	1	4	1	1	5	5	5	5	5	4	3	3	2
193	1	0	28	3	Having to work in a job where I deal with many people amid the coronavirus pandemic, and living with my senior parents during this.	5	0	0	0	0	1	0	0	0	0		1	6	7	4	3	2	4	3	2	4	3	2	2	4	2	3	3	5	3	4	2	4	1	1	5	4	4	5	5	3	4	3	2
261	1	1	37	3	The biggest stressor in the last three months has been the Covid-19 pandemic and constant anxiety about if we have it.	5	0	0	0	0	1	0	0	0	0		1	5	7	1	3	3	1	3	2	5	3	4	3	3	1	2	1	5	3	4	2	4	3	2	4	4	4	3	4	4	1	1	4
351	1	0	63	3	Currently it is the COVID19 virus and making the changes required to observe proper social distancing. Before that we were nursing our beloved dog through bone cancer. Unfortunately she died just before the statewide stay at home restrictions were instituted.	5	0	0	0	0	1	0	0	0	0		1	7	7	2	1	1	4	3	1	4	4	2	1	5	2	1	2	5	2	5	1	5	1	1	5	4	5	5	5	3	3	2	3
359	1	0	30	3	Stress and anxiety about my health and the health of my family and friends due to the coronavirus outbreak.	5	0	0	0	0	1	0	0	0	0		1	6	7	1	1	2	1	2	2	1	1	1	3	1	1	1	1	3	2	4	2	3	1	2	2	4	4	5	4	3	2	2	3
418	1	0	32	3	The biggest stressor is not knowing what is going to happen with covid 19	5	0	0	0	0	1	0	0	0	0		1	5	5	2	2	3	2	3	3	4	4	4	3	4	1	2	3	4	3	4	2	4	3	2	4	4	4	3	4	3	2	2	2
446	1	0	49	3	now i`m facing the biggest stress for COVID-19.	5	0	0	0	0	1	0	0	0	0		1	2	1	6	5	6	3	1	3	2	4	1	1	2	1	1	1	2	2	3	3	5	4	5	5	5	3	2	1	4	3	2	3
22	1	1	66	4	Dealing with Parkinson's disease.	5	0	0	0	0	1	0	0	0	0		0	5	6	4	2	1	2	2	1	1	1	2	1	2	1	1	1	2	1	4	1	4	1	1	3	4	5	5	5	3	3	2	4
134	1	0	23	4	I started dealing with hypoglycemia. If I didn't eat a full, hearty meal, I would experience varying degrees of confusion, anxiety, and irritability.	5	0	0	0	0	1	0	0	0	0		0	5	5	4	4	3	2	2	1	3	3	2	2	1	1	1	1	2	2	3	2	3	2	3	3	3	4	4	3	3	1	1	4
145	1	0	20	4	I need to pick up a prescription for a medication that I will likely be taking for the rest of my life, but with my current insurance situation the copay is a bit too expensive for my means.	5	0	0	0	0	1	0	0	0	0		0	7	5	7	4	2	4	5	1	5	4	5	3	5	3	5	5	5	5	5	2	5	1	1	3	4	4	5	5	1	4	4	2
174	1	0	36	4	My elderly dad broke his leg	5	0	0	0	0	1	0	0	0	0		0	7	7	1	3	2	2	3	3	5	3	2	3	3	2	2	3	4	4	4	1	4	2	3	2	3	5	4	3	3	1	3	4
198	1	0	45	4	My mom had a diagnosis of recurrent uterine cancer.	5	0	0	0	0	1	0	0	0	0		0	7	7	1	1	1	1	1	1	1	1	1	3	1	1	1	1	1	1	5	1	5	1	1	5	5	5	5	5	3	2	1	4
241	1	1	38	4	I had a fairly long road trip that I was taking completely on my own. I do this once every year, but they are typically only 5-6 hours. This particular trip was over 9 hours and I was pretty depressed for several days leading up to it just thinking of leaving my family for a few days and planning ways to combat driver fatigue, boredom, physical and mental health.	5	0	0	0	0	1	0	0	0	0		0	7	1	7	7	7	5	5	2	2	5	1	2	5	1	2	1	5	1	4	2	1	1	1	3	2	4	5	5	3	1	1	4
338	1	1	45	4	My biggest stressor of the last 3 months has been financial concerns. I have some health issues that require frequent visits and expensive medications.	5	0	0	0	0	1	0	0	0	0		0	6	4	4	3	4	4	3	1	4	2	1	2	4	1	1	4	5	2	4	1	5	1	1	3	2	5	5	5	3	2	1	4
423	1	0	35	4	The situation that generates the most stress for me at present is the fight against cancer of a maternal uncle to whom I have great affection.	5	0	0	0	0	1	0	0	0	0		0	7	7	1	1	1	3	2	1	2	1	1	1	2	1	1	1	2	2	5	2	5	1	1	2	4	4	5	5	4	1	1	4
41	1	1	50	4	my biggest stressor over the last three months has been the coronavirus. It has disrupted the lives of the entire world	5	0	0	0	0	1	0	0	0	0		1	7	7	1	1	1	1	1	3	3	1	1	3	3	1	1	1	2	2	5	1	5	1	1	5	5	5	5	5	4	1	1	4
57	1	0	34	4	Covid19	5	0	0	0	0	1	0	0	0	0		1	5	7	1	1	1	3	3	2	3	3	2	2	1	2	4	3	4	3	3	2	3	3	1	4	3	4	3	5	3	2	1	4
100	1	1	26	4	The biggest stressor has been the shutdown during COVID-19. We are caring for a toddler and working at the same time and it is exhausting. We fear losing our jobs and our sanity.	5	0	0	0	0	1	0	0	0	0		1	7	7	2	1	1	1	1	1	1	1	1	2	1	1	1	1	1	1	5	1	5	1	1	5	5	5	5	5	4	3	3	3
135	1	0	30	4	A recent big stressor is about my health. For some reason, my legs have been getting weak for no reason and my back has started to give out on me on the drop of a dime. Dealing with these strange issues is stressing me the heck out. It's difficult to diagnose these issues myself, and seeing a doctor is quite hard with the coronavirus situation.	5	0	0	0	0	1	0	0	0	0		1	6	6	2	1	1	2	4	1	2	4	2	1	4	1	2	4	3	3	4	1	3	2	2	3	3	5	4	4	2	3	3	2
137	1	0	39	4	Covid-19 is making me incredibly stressed. It has cancelled out trips forced us to stay home and crreated unending fear	5	0	0	0	0	1	0	0	0	0		1	7	7	1	1	1	4	5	4	5	4	5	2	4	4	5	4	5	5	4	2	3	2	2	3	4	4	4	4	3	2	2	4
148	1	1	30	4	Dealing with Coronavirus threats while pregnant.	5	0	0	0	0	1	0	0	0	0		1	7	7	2	1	1	1	1	1	4	3	2	3	3	2	2	1	3	2	5	1	5	1	2	3	4	5	5	4	3	2	1	2
171	1	0	42	4	The biggest stressor that I have faced in the last three months is the COVID-19 virus. I live in New York, the epicenter for the virus in the US. My wife is prone to lung issues and is diabetic so she is very at risk. My daughter's school closed two weeks ago, I am now working from home, not leaving the house except to get some exercise and only seeing my friends and family over video chat. I don…	5	0	0	0	0	1	0	0	0	0		1	7	5	1	1	1	1	1	1	1	1	1	1	1	1	1	1	1	1	3	3	3	2	3	2	3	3	4	3	3	1	1	4
184	1	0	57	4	Dealing with COVID-19 public health threat.	5	0	0	0	0	1	0	0	0	0		1	6	6	1	2	1	1	2	1	2	1	1	1	2	1	1	1	3	1	2	1	4	2	4	4	3	5	4	2	3	3	3	4
317	1	0	38	4	The biggest stressor is COVID-19. In my personal life, it's been a major problem due to closures of a lot of businesses I usually go to like restaurants and movie theaters. At work it forces me to telework - something I enjoy, but a lot of other people are fighting to use limited remote resources.	5	0	0	0	0	1	0	0	0	0		1	5	5	1	1	2	1	1	1	3	1	1	1	3	1	1	1	1	1	5	1	5	1	1	5	5	5	5	5	2	4	2	1
321	1	1	41	4	Considering the last 3 months I would have to say the coronavirus situation in California where I live right now. It is getting worse and worse every day and we can't find supplies that we need and they're telling us we should all be wearing masks now and you can't find them anywhere the whole situation is super stressful and scary	5	0	0	0	0	1	0	0	0	0		1	7	7	1	2	1	2	2	1	2	2	1	2	2	1	2	1	3	2	4	2	4	2	2	4	4	4	4	4	4	3	2	2
26	1	0	36	5	I was in a lot of physical pain from digestive health problems. It took a lot of energy out of me and I had to deal with it despite not having any treatment. It drained me physically and mentally.	5	0	0	0	0	1	0	0	0	0		0	6	6	2	4	2	3	3	4	5	3	5	4	4	2	3	3	3	4	4	2	5	2	2	3	4	4	4	4	3	2	2	3
45	1	1	44	5	The biggest stressor I have faced over the last few months is my husband being sick. He had a surgery in January that depleted him he didn't bounce back as quickly. He then had to have blood work drawn. His blood count was low. Then he had a really bad upper respritory infection in February. It has just been a few difficult months.	5	0	0	0	0	1	0	0	0	0		0	7	7	1	1	1	1	1	1	1	1	1	1	1	1	1	1	1	1	5	1	5	1	1	5	5	5	5	5	4	1	1	4
93	1	1	29	5	Miscarriage	5	0	0	0	0	1	0	0	0	0		0	7	7	6	1	3	4	3	3	3	3	1	1	3	2	2	3	4	4	4	1	5	2	2	4	5	5	4	4	3	4	4	1
337	1	0	21	5	The most stressful thing in my life lately has probably been starting a new medication.	5	0	0	0	0	1	0	0	0	0		0	5	4	5	3	5	4	3	2	4	4	4	2	3	3	4	2	4	4	3	1	3	3	2	3	4	5	3	4	2	3	2	2
357	1	0	27	5	Depression and anxiety, I started seeing a professional and trying medication	5	0	0	0	0	1	0	0	0	0		0	7	7	7	4	5	4	4	4	4	5	4	4	5	4	4	4	4	4	3	5	4	4	3	4	4	1	2	3	3	4	4	1
374	1	0	42	5	Yesterday I almost had a panic attack in the grocery store from all the people refusing to distance themselves with each other.	5	0	0	0	0	1	0	0	0	0		0	5	5	4	5	5	3	3	1	2	1	1	1	1	1	2	3	3	2	5	1	3	1	1	3	4	5	5	5	3	3	2	3
389	1	1	31	5	A few months ago, my dog got extremely sick. We tried to keep him comfortable but it was clear that he was getting worse and I knew if we didn't do anything, he'd die. We took him to the vet and they had to keep him overnight. I couldn't sleep that night because I was worried that I would miss a call bearing bad news. Fortunately, my dog got better but we still don't know what caused the incident…	5	0	0	0	0	1	0	0	0	0		0	7	7	5	6	4	3	4	3	3	4	2	1	3	1	3	3	3	4	3	2	4	2	2	4	3	4	4	4	3	3	1	3
455	1	1	24	5	living with severe anxiety problems	5	0	0	0	0	1	0	0	0	0		0	5	5	5	3	2	4	4	2	4	4	4	2	4	4	4	4	4	4	3	1	3	2	2	2	3	5	4	4	3	3	3	3
21	1	0	33	5	Coronavirus completely changing my life around.	5	0	0	0	0	1	0	0	0	0		1	7	7	1	3	2	1	3	2	3	1	2	2	4	1	1	2	4	1	3	3	3	3	2	4	5	3	3	4	3	3	1	3
56	1	0	35	5	I am stressed about the recent pandemic involving COVID-19 and how it affects my life and the lives of my close family members.	5	0	0	0	0	1	0	0	0	0		1	7	7	1	2	1	4	4	1	1	1	3	2	4	4	4	4	4	4	1	1	1	5	4	2	1	5	1	2	2	2	2	4
82	1	0	27	5	With the covid-19 outbreak, I was worried I might lose my job. I would not know how to pay the bills. I would have to file for unemployment. I was definitely worried about getting sick as well.	5	0	0	0	0	1	0	0	0	0		1	7	7	1	3	3	5	2	3	4	4	5	2	4	1	4	4	5	2	4	4	5	2	2	5	5	2	4	4	3	2	2	3
101	1	0	31	5	Biggest stressor for last couple of months has been this coronavirus situation	5	0	0	0	0	1	0	0	0	0		1	5	7	1	1	2	2	1	2	2	4	2	2	2	1	2	1	2	2	2	1	4	2	2	3	2	5	4	4	3	1	1	4
119	1	1	35	5	Going into isolation because of the coronavirus - I am in multiple risk groups.	5	0	0	0	0	1	0	0	0	0		1	5	5	1	2	1	3	4	1	3	3	1	1	3	1	3	2	4	1	5	4	5	1	1	4	1	2	5	5	4	4	3	2
130	1	0	55	5	COVID-19. My wife works as a paramedic and will not come off the road during this time. I worry constantly that she will contract the virus while taking patients to the hospital.	5	0	0	0	0	1	0	0	0	0		1	6	6	6	1	1	1	1	1	4	4	4	4	3	3	3	2	4	4	1	4	2	2	3	3	3	2	4	3	2	2	3	2
192	1	1	27	5	the COVID-19 stay-at-home order for my county, and in general the spread of the illness	5	0	0	0	0	1	0	0	0	0		1	7	7	1	1	1	1	1	1	1	1	1	1	1	1	1	1	1	1	5	1	5	1	1	5	5	5	5	5	4	1	1	4
289	1	1	22	5	Coronavirus and how much it has changed my routine	5	0	0	0	0	1	0	0	0	0		1	7	5	1	1	1	2	2	1	2	1	1	2	2	1	2	2	2	2	3	2	3	1	2	4	4	4	5	4	3	2	1	4
313	1	0	41	5	COVID-19. We've been forced to shelter in place. This is causing unprecedented unemployment. While we are currently safe and still employed, it's hard to find groceries/supplies and my wife is still forced to go to work, leaving her in an increased risk situation.	5	0	0	0	0	1	0	0	0	0		1	7	7	1	2	1	1	3	2	3	2	2	2	3	1	3	4	4	4	2	3	3	3	3	2	3	3	3	3	3	3	2	3
361	1	0	35	5	At this moment in the house there is a lot of stress due to everything that is happening on the street by the covid 19	5	0	0	0	0	1	0	0	0	0		1	5	4	3	3	4	3	3	2	2	3	3	2	2	3	2	2	2	2	2	3	2	3	3	4	4	3	3	3	3	3	3	2
383	1	0	29	5	Currently I have only had problems with the covid-19 virus, that has me very worried since I would not like to give it to my son.	5	0	0	0	0	1	0	0	0	0		1	5	3	3	3	3	3	3	2	3	3	3	3	3	3	3	2	3	3	5	2	5	3	3	3	5	4	3	3	3	1	1	2
430	1	1	32	5	Over the past three months the biggest stressor I've faced has been the current coronavirus outbreak. I'm very worried about the health of my parents who are in higher risk categories and they live far away from me. I think about them all the time and worry about them getting seriously ill.	5	0	0	0	0	1	0	0	0	0		1	7	7	1	1	1	2	2	1	2	1	1	1	3	1	1	1	4	2	3	2	4	3	3	4	3	4	3	3	4	2	1	3
448	1	0	35	5	Currently, the biggest stressor is the COVID 19 pandemic. If we are to ignore that for this study, it would be my father's health. They found out he had brain tumors and had to perform two brain surgeries to remove them. The cause was lung cancer. They are just getting started on radiation and treatment.	5	0	0	0	0	1	0	0	0	0		1	7	7	1	2	1	1	2	2	1	1	1	4	1	1	1	1	5	1	4	2	5	2	2	4	4	4	4	4	4	1	1	4
465	1	0	29	5	I am very concerned because of the pandemic that is in the world and which affects us all	5	0	0	0	0	1	0	0	0	0		1	7	7	2	1	1	4	3	2	3	3	3	3	3	3	4	3	2	3	2	3	3	3	2	3	3	3	3	4	3	2	2	1
6	1	0	34	6	The biggest stressor I faced was my battle with depression. I was unable to do a lot of things people usually do. This was also coupled with anxiety. I was anxious to do things or go out in public and felt bad when others didn't call me to check in.	5	0	0	0	0	1	0	0	0	0		0	5	5	5	5	5	3	2	3	3	2	2	1	3	2	2	3	2	3	3	2	4	3	3	4	3	4	3	3	2	3	3	3
113	1	1	48	6	Losing my leg below the knee and dealing with that and learning to walk again	5	0	0	0	0	1	0	0	0	0		0	7	5	6	4	5	4	4	2	3	2	2	2	3	2	2	2	4	2	3	2	3	3	2	3	3	4	3	4	3	2	2	4
310	1	0	36	6	Before I had a lot of stress at work, but now I have it at home. I can't stop thinking if I can get sick.	5	0	0	0	0	1	0	0	0	0		0	5	5	5	5	4	3	4	3	3	4	4	3	3	3	2	2	3	2	3	3	2	3	3	3	3	3	3	3	3	3	2	3
380	1	1	29	6	I had a hysterectomy and endometriosis removal surgery last week. It was a five hour surgery, and recovering from it has definitely been stressful. I’m sore and tired, and it’s hard not being able to do things around the house.	5	0	0	0	0	1	0	0	0	0		0	6	1	1	4	1	5	5	2	5	2	4	2	5	1	1	2	5	2	2	4	3	2	3	3	3	2	4	3	2	3	2	4
422	1	0	34	6	Now I have a lot of stress due to family health problems that do not let me work calmly	5	0	0	0	0	1	0	0	0	0		0	5	4	5	5	3	3	4	2	3	3	2	3	2	3	2	3	2	2	3	3	2	4	4	3	4	3	2	2	3	2	2	2
438	1	0	45	6	Two months ago I took my wife for a CT scan after a fall and it was discovered that she had stage 4 cancer of the colon which had metastasis to her liver and her lung. Everything changed that day, our whole view of life and our whole future.	5	0	0	0	0	1	0	0	0	0		0	7	7	1	3	3	2	3	4	1	1	1	4	1	1	1	1	1	1	4	3	5	2	2	4	3	3	4	4	3	2	1	3
7	1	1	43	6	I would say that the biggest stessor that I have faced in the last three months would have to be dealing with the COVID-19 (Coronavirus Pandemic). I say this because it has effected so much of my daily life. It has effected me socially, financially, worried about my health and well-being as well as those of relatives, neighbors, and friends.	5	0	0	0	0	1	0	0	0	0		1	6	6	1	1	1	1	1	1	1	1	1	1	1	1	1	1	1	1	5	1	4	1	1	5	5	5	5	5	3	2	2	3
108	1	0	39	6	The biggest stressor for me has been the coronavirus and whether other people would infect me with it	5	0	0	0	0	1	0	0	0	0		1	7	7	1	4	1	1	5	2	5	5	2	2	5	3	5	4	5	5	1	5	1	5	5	1	1	1	1	1	2	4	4	1
124	1	0	50	6	Personal current health situation, and general virus worry	5	0	0	0	0	1	0	0	0	0		1	7	7	2	1	2	5	3	1	4	3	3	1	3	2	3	2	4	3	5	1	5	1	1	3	5	5	5	5	3	4	2	2
205	1	1	34	6	My husband currently thinks he has coronavirus. He's wheezing and having chest tightness. No fever. I think he may be having anxiety attacks but he has a family history of heart disease and I'm scared about that. We can't just go to the doctor right now with quarantine. I am also concerned about him actually having coronavirus. I've been the only one to leave the house for the last 2.5 weeks so I…	5	0	0	0	0	1	0	0	0	0		1	7	7	7	2	1	5	4	2	3	4	2	2	5	1	2	2	5	1	4	2	4	2	2	3	4	4	4	4	3	3	3	2
232	1	0	29	6	I have felt stressful in itself because of everything that is happening regarding the pandemic, on a personal level it is something that affects many roles in life such as employment, family, among others.	5	0	0	0	0	1	0	0	0	0		1	3	4	3	2	3	2	3	2	3	3	3	2	3	3	2	3	2	2	2	2	2	4	4	3	3	4	2	2	2	2	3	2
255	1	0	22	6	The biggest stressor that I have faced in the past three months has to be the situation going on right now. This situation involves me losing my job and having to be in lockdown due to the effects of the Corona virus pandemic occurring throughout the world.	5	0	0	0	0	1	0	0	0	0		1	6	6	1	1	1	2	3	2	1	2	1	2	3	2	2	2	1	2	1	3	2	3	3	3	2	3	3	3	2	2	2	1
312	1	1	62	6	My biggest stressor in the past three months has been a heath issue I need to have surgery for but I was waiting for my vacation to do it, so as not to disrupt my small business, but because of Covid-19, it had to be delayed even further.	5	0	0	0	0	1	0	0	0	0		1	4	1	1	1	2	2	1	3	1	1	1	4	1	1	1	1	2	1	5	1	5	1	1	5	4	5	5	5	4	1	1	4
323	1	1	28	6	I have been unsure if, because of the current situation with Covid19, my wife would be allowed to be in the labor and delivery room with me when I give birth to our son.	5	0	0	0	0	1	0	0	0	0		1	7	7	2	5	2	2	2	2	3	3	3	2	2	2	2	2	3	2	3	3	4	3	2	4	4	3	3	4	3	2	2	4
394	1	1	32	6	The biggest stressor I have faced in the last three months is dealing with repercussions of the Coronavirus.	5	0	0	0	0	1	0	0	0	0		1	7	7	1	1	1	1	1	1	1	1	1	1	1	1	1	1	1	1	5	1	4	1	1	4	4	5	5	5	3	1	1	4
421	1	1	26	6	I think the biggest stressor I have experienced in the last three months in the COVID-19 pandemic, which has resulted in shelter-in-place orders in my state and having to work from home and teach my classes online.	5	0	0	0	0	1	0	0	0	0		1	7	7	1	1	1	2	1	2	4	3	3	1	2	1	2	2	2	2	4	2	5	1	1	5	5	4	5	5	4	3	2	3
464	1	0	43	6	Being forced to stay at home during the COVID19 epidemic.	5	0	0	0	0	1	0	0	0	0		1	7	7	2	1	1	3	4	4	5	5	5	5	5	5	5	5	5	5	3	4	2	4	4	2	2	2	2	2	1	3	3	2
5	1	1	42	7	I had chest pain and went to the ER.	5	0	0	0	0	1	0	0	0	0		0	7	6	2	5	4	4	3	4	4	4	4	4	4	4	4	4	4	4	3	4	3	2	2	2	2	2	4	4	3	2	2	4
47	1	0	35	7	I had trouble with a tooth and was not covered by insurance at the time. I was unable to fix the tooth and I was worried it would become a bigger issue given time.	5	0	0	0	0	1	0	0	0	0		0	5	5	6	7	3	3	1	3	3	1	1	1	2	1	3	2	4	4	5	1	5	1	1	5	5	5	5	5	3	4	2	2
284	1	0	19	7	The biggest stressor for me in the last three months has been myself. I find it hard to get myself motivated and quite often have no drive to me.	5	0	0	0	0	1	0	0	0	0		0	7	7	7	1	5	4	3	2	4	3	2	4	4	4	4	4	4	4	3	4	4	4	4	4	3	2	2	2	2	4	4	2
295	1	1	50	7	The biggest stressor lately has been my health. I was recently diagnosed with multiple sclerosis after a year of strange symptoms	5	0	0	0	0	1	0	0	0	0		0	6	5	2	4	3	3	2	3	1	2	2	3	2	1	1	1	3	1	4	2	5	2	1	5	4	4	4	5	3	2	1	4
305	1	0	31	7	The biggest stressor has been mental illness, specifically intense mood swings and strange thoughts.	5	0	0	0	0	1	0	0	0	0		0	6	6	4	5	4	3	3	2	2	2	2	2	2	2	2	2	2	2	2	3	2	2	3	3	2	3	4	3	2	3	2	3
388	1	0	58	7	My spouse has arthritis and is in pain every day. There is little doctors can do short of surgery and she has had many surgeries in the past from a previous accident.	5	0	0	0	0	1	0	0	0	0		0	6	5	1	1	1	5	4	3	2	4	3	3	4	1	2	5	5	3	3	4	3	3	3	4	5	2	3	3	3	2	1	3
445	1	0	28	7	I hurt my lower back while exercising a few weeks ago and I've been in a pretty significant amount of pain ever since. It hurts bad enough that every day feels like an ordeal and it's stressful because it hasn't really been getting better.	5	0	0	0	0	1	0	0	0	0		0	5	7	6	2	4	2	2	1	3	2	1	2	3	1	2	2	4	2	3	3	4	3	3	2	2	3	3	3	2	4	3	2
458	1	0	37	7	This whole virus thing hAs been a huge stressor. Working from home, no child care, it has been a difficult experience.	5	0	0	0	0	1	0	0	0	0		0	6	6	2	1	1	2	2	2	3	3	2	2	3	2	2	2	2	2	3	2	3	2	3	2	4	4	4	3	4	2	2	3
81	1	0	19	7	The coronavirus has caused me the most stress over the past few monts.	5	0	0	0	0	1	0	0	0	0		1	6	6	1	1	1	1	2	4	4	1	2	3	2	1	1	1	3	2	4	3	4	2	2	4	3	3	4	4	3	1	1	3
136	1	0	33	7	Facing the virus is the biggest stressor in the last months. We are stressed about money. We are stressed about keeping our children safe.	5	0	0	0	0	1	0	0	0	0		1	6	6	6	3	3	3	2	2	2	4	4	4	3	2	3	2	3	4	3	3	3	3	4	4	4	3	3	2	2	2	3	3
168	1	0	37	7	Coronavirus. It has gotten in the way of work location as well as job duties.	5	0	0	0	0	1	0	0	0	0		1	5	5	1	4	1	3	3	3	4	3	2	3	3	4	3	3	2	3	3	3	3	3	3	3	3	3	3	3	2	3	2	2
233	1	0	23	7	In the past few months I've mainly been growing more concerned over the virus COVID-19 and its spread across the world.	5	0	0	0	0	1	0	0	0	0		1	5	6	1	1	3	4	3	2	3	2	2	3	2	1	3	3	4	2	3	4	4	3	2	4	5	2	3	4	3	2	1	3
257	1	1	41	7	I think right now all stressors are related to COVID-19 in some fashion. For me, it is dealing with my mental health issues in light of having to stay at home. This is not a good situation for me or my coping mechanisms.	5	0	0	0	0	1	0	0	0	0		1	7	7	1	5	1	3	1	1	1	2	1	1	1	1	2	1	4	1	4	1	4	1	1	3	2	5	5	5	3	2	1	3
291	1	1	52	7	Mom’s cancer diagnosis and I can’t go see her cause of covid	5	0	0	0	0	1	0	0	0	0		1	7	7	2	1	1	1	3	1	1	1	1	3	2	1	2	1	4	1	4	2	4	1	1	4	5	4	5	5	4	2	1	3
302	1	0	37	7	With the recent corona virus, my dad has COPD. So it would be hard if he got infected. So there's been a lot of stress recently on worrying about that. Lots of washing hands if I see him. Lots of hoping the limited amount he goes out (to get something he needs from the store) doesn't infect him.	5	0	0	0	0	1	0	0	0	0		1	5	5	2	2	3	1	3	2	4	3	3	2	3	1	2	2	4	2	4	2	4	2	2	4	4	4	4	4	3	2	2	3
371	1	0	30	7	The biggest stressor I have faced in the last 3 months has been the ongoing COVID-19 pandemic. My grandma is in her late 80s, my dad is 70, my little sister is a front line health care worker, and my older sister just had a baby. My little sister has 2 small boys, and her fiance worked in a restaurant, so he is out of work.	5	0	0	0	0	1	0	0	0	0		1	5	6	1	3	1	3	1	2	2	1	1	3	1	1	1	1	1	1	4	2	4	2	2	3	4	4	4	4	3	2	1	4
454	1	0	38	7	in my house there is a lot of stress at the moment for not being able to leave due to government orders to stay at home	5	0	0	0	0	1	0	0	0	0		1	4	7	6	5	5	2	3	2	3	3	2	3	3	3	2	2	2	2	3	3	3	2	2	3	3	3	4	4	3	2	2	2
8	1	1	65	8	I got bronchitis and had no insurance and no money to go to a doctor. I did the best I could for a few months until my Medicare kicked in and I was finally able to go to see a doctor and get an antibiotic.	5	0	0	0	0	1	0	0	0	0		0	6	7	3	5	4	1	4	3	4	3	3	2	3	1	3	2	5	2	4	2	4	2	2	5	3	4	4	4	3	2	3	4
236	1	1	59	8	I have a chronic progressive disability which limits my ability todo basic things more and more.	5	0	0	0	0	1	0	0	0	0		0	4	4	4	1	1	1	1	1	2	1	1	1	1	1	1	1	1	5	5	1	5	1	1	5	5	5	5	5	2	1	4	1
306	1	1	24	8	Health problems	5	0	0	0	0	1	0	0	0	0		0	5	7	1	2	2	4	3	3	2	2	1	3	1	1	1	1	2	1	3	3	3	2	2	2	4	3	4	4	3	1	1	4
406	1	1	54	8	Dealing with my family. My mother is 85 and has cancer. My father is 87, is a stroke survivor and has to take care of Mom. I have 3 sons: one with autism, one with severe depression and the third with an orthopedic disease that I passed on to him. My role of helping each of these people navigate daily life is stressful and challenging.	5	0	0	0	0	1	0	0	0	0		0	7	3	3	1	3	5	4	5	4	1	1	5	1	1	1	1	4	2	5	1	5	1	1	5	5	5	5	5	4	1	1	4
407	1	1	26	8	I had fairly major emergency surgery at the end of last year that led to a month-long recovery at home. I wasn't able to work during this period, and my ability to move around and live my life normally was significantly impacted.	5	0	0	0	0	1	0	0	0	0		0	5	6	3	7	2	4	2	1	2	2	1	1	2	1	3	4	2	2	3	2	4	2	2	4	4	4	4	4	2	4	2	2
408	1	0	35	8	In the last three months I have not had such a complicated problem. But in my illness, migraine ached.	5	0	0	0	0	1	0	0	0	0		0	5	3	1	6	4	4	2	2	3	1	2	3	4	3	1	2	1	2	2	2	3	2	4	4	4	4	4	2	3	2	2	4
432	1	0	31	8	Trying to get $1,300 for a dental surgery that is considered non-essential by insurance.	5	0	0	0	0	1	0	0	0	0		0	6	6	5	2	3	4	2	3	3	2	2	2	3	2	2	2	4	3	3	3	3	4	3	2	3	3	2	3	3	2	2	4
19	1	0	55	8	Illness. After going open heart surgery the recovery process was very difficult for me. After feeling a little better Corona Virus started up. Now it is a very tough time. dealing with both these things going on	5	0	0	0	0	1	0	0	0	0		1	5	2	2	2	1	2	2	2	2	3	3	3	3	1	1	1	3	3	4	2	5	3	1	2	2	4	3	5	3	2	1	1
185	1	1	35	8	The biggest stressor I have faced over the last three months has been the Coronavirus pandemic and worrying about how it will affect me, my family and my loved ones. I have anxiety, anyway, and at times I worry about this significantly. I worry about my family contracting the illness and I worry that someone will become severely ill.	5	0	0	0	0	1	0	0	0	0		1	7	4	1	4	1	1	1	1	1	1	2	2	2	1	3	2	2	3	3	3	4	2	1	2	3	3	4	5	3	3	2	4
211	1	0	38	8	The Covid-19 Scare is the biggest stressor I've faced in the last 3 months	5	0	0	0	0	1	0	0	0	0		1	6	7	1	1	1	3	3	2	5	2	2	2	3	1	3	2	4	3	4	2	5	2	1	4	4	4	4	5	3	1	1	4
314	1	1	56	8	The biggest stressor that I am currently facing is staying healthy in the midst of our current global health crisis. I have severe chronic asthma. I am on daily inhalers/corticosteroids for chronic inflammation. I have a compromised immune system. I am considered to be in a high-risk category when it comes to addressing and assessing how to deal with the Covid-19 pandemic. I have an additional st…	5	0	0	0	0	1	0	0	0	0		1	7	7	1	2	1	2	3	1	3	4	4	1	4	1	3	1	3	3	5	1	5	1	1	5	5	5	5	5	4	3	3	4
369	1	1	51	8	The biggest stressor has been facing this coronavirus pandemic, it's impact on me personally, socially, economically, etc.	5	0	0	0	0	1	0	0	0	0		1	7	7	1	1	1	2	2	2	2	2	2	2	2	2	2	2	2	2	2	3	4	3	2	3	3	3	3	4	3	3	2	3
386	1	1	40	8	In the beginning of February my husband and myself came down with some sort of respiratory virus and were sick for weeks. It affected our income since we couldn't work and could barely get anything else done due to the illness. We are just now getting caught up with our lives	5	0	0	0	0	1	0	0	0	0		1	7	7	2	6	1	3	1	1	1	4	1	2	1	1	1	1	1	1	5	1	4	1	1	4	3	5	5	5	3	1	1	4
348	1	0	53	1	being hungry all a lot. I don't have enough money to buy all the food i need and have to cut back on what i eat half the month.	6	0	0	0	0	0	1	0	0	0		0	4	7	7	2	4	1	4	1	5	5	3	1	4	3	2	4	5	4	2	4	3	4	3	3	4	2	2	3	1	3	4	3
441	1	1	32	1	When My dad passed away having to take care of all of the bills and the car and all of that and especially with the holidays coming up.	6	0	0	0	0	0	1	0	0	0		0	7	1	7	7	1	4	1	1	1	3	1	1	5	2	1	3	3	3	2	2	4	1	1	4	1	4	5	5	3	1	1	4
427	1	1	62	2	I was paying some of my mom's bills at the end of her life and had some money that I owed on a credit card. I was paying on it but was behind so they sold it to another company. The company demanded 40 percent paid in one month or they would pursue legal action. We are in great shape financially but my husband does not know about this as it would upset him. I scraped together the 40 percent but i…	6	0	0	0	0	0	1	0	0	0		0	7	7	7	7	1	1	1	1	1	1	1	1	1	1	1	1	1	1	5	1	5	1	1	5	5	5	5	5	4	1	1	4
25	1	0	41	3	It would be with money. Not knowing if I would have enough to pay for bills.	6	0	0	0	0	0	1	0	0	0		0	4	6	6	5	7	4	3	5	5	2	5	3	4	4	2	4	2	5	3	5	3	3	4	3	5	1	3	2	2	1	1	3
63	1	1	42	3	The biggest stressor has been the year of careful planning of our vacations has been upended our vacations. Some places are not offering up refunds.	6	0	0	0	0	0	1	0	0	0		0	6	7	1	3	1	1	1	1	1	1	1	1	1	1	1	1	1	1	4	2	5	2	1	4	5	4	4	5	4	1	1	3
160	1	1	40	3	The biggest stressor I faced in the last three months was financial difficulties. I was not making enough money and I was worried about how I was going to be able to pay a few bills.	6	0	0	0	0	0	1	0	0	0		0	6	5	7	3	5	4	3	1	4	4	3	1	3	2	5	4	5	3	5	1	5	1	1	3	5	5	5	5	4	2	2	3
222	1	1	70	3	My biggest stressor continues to be lack of adequate supplementary financial income for my retirement. When I retired in 2014, I rolled my 401K into an IRA. Six years later, I have little money left in the IRA. Social Security income alone does not last the month for me.	6	0	0	0	0	0	1	0	0	0		0	7	6	6	2	2	2	2	2	2	3	2	2	2	2	2	3	4	3	4	3	4	2	2	4	4	3	4	4	3	4	3	2
265	1	1	24	3	I haven't been able to find a full-time job since graduating college. This has led to financial difficulties. It has just gotten even worse over the last few months. I'm having to borrow money and max out credit cards just to keep my pets fed and medicated properly.	6	0	0	0	0	0	1	0	0	0		0	7	7	5	1	1	4	2	3	3	3	1	4	2	2	4	1	4	2	5	2	5	1	1	5	4	4	5	5	4	4	2	2
342	1	1	53	3	Not having enough money no matter how hard I work.	6	0	0	0	0	0	1	0	0	0		0	7	7	1	1	4	1	5	1	5	5	5	1	5	3	5	5	5	5	2	3	4	4	3	4	4	3	2	3	4	1	2	3
382	1	1	59	3	Earning enough money to pay bills.	6	0	0	0	0	0	1	0	0	0		0	7	7	7	1	3	1	3	1	4	1	3	1	3	1	3	5	3	4	5	1	5	1	1	5	4	5	5	5	2	4	3	1
404	1	1	33	3	The biggest stress factor that I have had within the last 3 months would be about a car. The I had kept having tons of problems and becoming a money pit of worthlessness. I took the steps to obtain a new vehicle in the price range I wanted. Only problem was stressing about coming to a resolution before becoming overwhelmed. Plus I have to have a car for day to day and for my significant other to …	6	0	0	0	0	0	1	0	0	0		0	6	5	1	7	3	3	1	1	3	3	3	1	2	1	3	1	4	1	4	2	5	2	1	5	4	4	4	5	3	1	3	2
410	1	1	33	3	The biggest stress I have faced in the last three months would have to be financial. At the moment, we don't have running water inside or a working septic, so we are paying a porta potty company. Myself and my husband both need to see a doctor and dentists, for many reasons, and the lack of funds for the important stuff is very stressful and disheartening. It is hard to have physical issues that …	6	0	0	0	0	0	1	0	0	0		0	7	7	5	2	3	3	3	2	5	2	4	2	4	2	5	3	5	4	5	2	5	2	1	5	4	4	4	5	2	3	3	3
420	1	0	31	3	Specially i have few problems but one of the major is financial problem.	6	0	0	0	0	0	1	0	0	0		0	7	3	6	6	5	5	4	3	4	4	5	4	5	4	2	4	4	5	4	2	4	4	5	3	4	4	2	1	4	3	3	4
35	1	1	28	3	Loss of income in the household, due to the corona virus and all the shut downs.	6	0	0	0	0	0	1	0	0	0		1	5	5	1	1	1	3	3	1	2	3	3	1	3	1	3	1	3	1	5	1	5	1	1	5	5	5	5	5	4	2	1	4
277	1	1	43	3	The COVID-19 epidemic forcing my husband's business to close for at least three weeks. This is causing financial stress.	6	0	0	0	0	0	1	0	0	0		1	6	6	1	3	1	2	2	2	1	1	1	2	1	1	1	1	2	1	2	3	3	3	2	3	2	3	3	4	4	1	1	4
390	1	0	36	3	My biggest stressor has definitely been paying bills and financial difficulties. I have been making some good progress increasing my income but this virus put an abrupt stop to that.	6	0	0	0	0	0	1	0	0	0		1	6	7	7	3	3	1	2	1	3	4	4	1	2	1	1	3	4	1	5	1	5	1	1	4	5	5	5	5	3	2	3	4
42	1	0	56	4	I have been facing increasing stress over financial problems, esp. credit card debt. Although some of the companies are relaxing rules, I have been still been getting dunning calls and letters about this and I don't know what I'm going to do.	6	0	0	0	0	0	1	0	0	0		0	6	5	5	2	4	4	4	2	4	3	4	1	4	3	4	4	4	4	1	4	3	3	3	3	3	2	3	3	2	4	4	2
91	1	0	38	4	I lost my job	6	0	0	0	0	0	1	0	0	0		0	6	6	4	1	1	4	2	4	3	4	3	3	3	4	4	2	2	4	2	4	3	2	4	4	5	2	4	2	4	1	1	4
195	1	1	56	4	I had been a victim of a credit card fraud case. They tried to steal $400+ from me but luckily my company called to stop it. I still had to go without a credit card for awhile til they sent me a new one because I only use one. It was stressful waiting and hoping about things getting back to normal again.	6	0	0	0	0	0	1	0	0	0		0	6	6	4	6	5	3	2	3	4	2	1	2	3	2	2	3	4	3	4	2	4	2	3	4	4	4	4	3	3	2	2	3
228	1	1	66	4	I had been semi-retired for 4 years still working part time from home to supplement my income. In January I decided to go into full time retirement, so adjusting to the lack of income and changing my supplemental health insurance was a little stressing.	6	0	0	0	0	0	1	0	0	0		0	3	1	7	7	7	3	3	1	1	1	1	3	4	1	1	1	4	2	4	2	5	2	1	5	5	4	4	5	3	2	1	3
259	1	0	30	4	The biggest stressor in my life during the past three months has been my finances. I am self-employed and run a marketing business from my home. I recently lost my largest client and have been getting by on a very tight budget.	6	0	0	0	0	0	1	0	0	0		0	6	6	3	1	3	2	4	1	5	2	2	1	1	1	3	3	2	2	4	2	4	2	1	3	4	4	4	5	3	2	3	3
273	1	1	32	4	My biggest stressor over the last three months has been financially-related. I am trying to transition from one job, to many, freelance jobs. This required cutting my hours of my regular job to pursue other income, but that other income has not been as reliable.	6	0	0	0	0	0	1	0	0	0		0	5	5	5	2	5	2	2	1	3	2	1	1	2	1	2	1	2	2	5	2	5	2	1	3	5	4	4	5	3	2	2	2
275	1	0	31	4	definitely financial stresses from credit card debt from medic bills in 2019.	6	0	0	0	0	0	1	0	0	0		0	5	5	4	5	6	4	4	3	5	4	4	4	4	3	5	5	5	4	5	3	4	2	4	3	4	3	4	2	4	2	2	4
298	1	0	50	4	Financial problems are my biggest stressors at this time. I have a child entering college in the fall and there is stress involved in trying to pay for his education.	6	0	0	0	0	0	1	0	0	0		0	5	2	7	2	5	4	4	4	5	4	5	4	4	4	3	4	4	5	5	2	5	5	4	4	5	4	1	2	4	2	3	3
395	1	0	48	4	My biggest stressor has been the fact that my salary has not been enough to pay all my bills.	6	0	0	0	0	0	1	0	0	0		0	6	6	7	2	5	4	4	1	4	2	3	2	2	4	4	5	5	4	3	3	3	4	2	3	3	3	2	4	3	3	3	3
167	1	0	48	4	Just recently I was laid off because of COVID-19. I don't know when it will end and I can go back to work. The money issue will be a huge factor int he coming months. It is a big worry since we have no idea when the state or country will get back to normal.	6	0	0	0	0	0	1	0	0	0		1	5	6	1	1	1	1	1	1	1	1	1	1	1	1	1	1	1	1	5	1	5	2	2	5	5	5	4	4	3	2	2	3
175	1	0	70	4	The recent Coronavirus scare which is ongoing.Financial hit in the stock market.	6	0	0	0	0	0	1	0	0	0		1	6	7	2	4	2	2	2	2	3	1	1	2	2	1	1	1	3	1	4	2	4	2	4	4	4	4	4	2	3	1	1	4
190	1	0	32	4	I trade capital markets for a living. Recently, due to the outbreak of Covid-19 in the United States and its impact on the economy, the stock market and other asset markets began melting down. I had a lot of capital invested in trades and investments. The trades I exited for losses but the investments I had to watch endure major depreciation in value. It was a stressful time for me financially.	6	0	0	0	0	0	1	0	0	0		1	5	6	3	2	2	1	4	1	3	2	1	1	2	1	1	1	4	1	3	3	3	3	2	2	2	3	3	4	3	2	2	3
20	1	0	35	5	Buying a new house was a long, tedious, and stressful process	6	0	0	0	0	0	1	0	0	0		0	6	1	4	7	4	1	4	3	4	3	4	2	4	1	1	3	3	3	4	2	5	2	1	4	3	4	4	5	3	1	1	4
78	1	0	41	5	Our backyard fence got knocked over during a thunderstorm. It was time consuming and expensive to get it fixed.	6	0	0	0	0	0	1	0	0	0		0	6	6	1	7	1	3	1	1	3	4	1	1	1	1	1	2	3	3	4	2	5	3	2	4	4	4	3	4	3	1	1	4
90	1	0	28	5	Financial stress from not working	6	0	0	0	0	0	1	0	0	0		0	7	7	7	5	6	3	3	3	5	3	3	3	3	3	3	3	3	5	5	1	5	1	1	5	1	5	5	5	4	1	1	4
212	1	1	29	5	More recently I got into a car accident and totaled my car. It required a lot of work fro me to find a new car, and now I have a new financial stressor that I didn't previously have because my old car was paid off, and now I have a loan on the new one.	6	0	0	0	0	0	1	0	0	0		0	6	5	7	7	4	4	1	1	3	3	3	4	1	1	2	3	4	2	4	1	5	2	1	4	3	5	4	5	3	1	1	3
264	1	0	36	5	The biggest stressor I faced was not having enough money to pay all my bills.	6	0	0	0	0	0	1	0	0	0		0	5	5	5	3	5	3	3	2	2	2	3	3	3	3	3	3	3	3	3	3	3	3	3	3	3	3	3	3	3	3	2	3
11	1	1	32	5	The biggest stressor that I have faced recently i the current coronavirus pandemic. Both my husband and I work for small businesses that have been affected. My hours and pay have been cut in half. My husband is still able to work but he has to come into contact with people multiple times every day.	6	0	0	0	0	0	1	0	0	0		1	6	6	3	3	3	4	3	1	4	2	2	2	4	2	4	4	4	3	3	2	3	2	2	3	3	4	4	4	3	2	2	3
72	1	1	33	5	Finances for sure. Especially during this coronavirus outbreak	6	0	0	0	0	0	1	0	0	0		1	6	5	5	1	4	4	4	3	4	3	3	3	3	3	3	3	3	3	3	1	4	1	3	4	2	5	5	3	3	1	1	3
116	1	1	63	5	The recent corona virus scare has hit my retirement accounts hard. Watching my money go out the window has been extremely stressful on top of the whole uncertainty of getting ill, worry about getting enough food and medicine, how long it will all last. It's all related to the pandemic.	6	0	0	0	0	0	1	0	0	0		1	5	7	1	1	1	1	3	1	3	1	1	1	3	1	3	3	4	3	3	3	3	2	2	4	4	3	4	4	3	3	1	3
142	1	1	59	5	The biggest stressor I have faced in the last three months is losing income due to the Coronavirus. I score student tests and there are now less to score because schools are closed.	6	0	0	0	0	0	1	0	0	0		1	5	6	1	1	1	2	3	2	1	1	1	2	3	1	1	2	5	1	4	2	4	2	2	4	4	4	4	4	4	1	1	4
278	1	1	52	5	biggest stressor has been job loss due to coronavirus	6	0	0	0	0	0	1	0	0	0		1	5	7	1	3	2	4	4	1	4	4	4	3	1	5	2	4	3	4	3	2	5	3	1	5	4	4	3	5	3	1	2	4
292	1	1	36	5	Having to stop interacting with all of my customers because of COVID-19. I am exclusively working from home now and taking a large financial loss.	6	0	0	0	0	0	1	0	0	0		1	7	7	1	1	1	4	3	1	3	3	2	1	4	1	2	2	5	3	4	2	4	2	2	4	4	4	4	4	3	2	1	4
319	1	1	27	5	With the outbreak of coronavirus, my partner, a restaurant manager, lost her job. We now rely only on my income until her unemployment is processed.	6	0	0	0	0	0	1	0	0	0		1	7	7	2	2	2	3	4	2	2	3	2	2	4	1	3	2	5	2	5	2	5	1	1	4	5	4	5	5	4	2	2	3
12	1	1	53	6	Financial difficulties has been the biggest stressor. The cost of everything has gone up but incomes have not.	6	0	0	0	0	0	1	0	0	0		0	6	6	7	1	2	3	2	1	3	1	1	1	1	1	1	3	2	1	5	1	5	1	1	5	5	5	5	5	3	1	1	4
13	1	0	44	6	my wife went back to school and graduated last year. She has been looking for a job in her new field since then and so far, has found nothing. We are paying on her tuition bills and her income is the same as before.	6	0	0	0	0	0	1	0	0	0		0	6	5	3	2	3	3	2	1	4	1	2	2	1	1	2	2	3	1	4	3	4	3	3	4	4	3	3	3	4	2	1	4
34	1	0	34	6	Facing a 25K credit card debt	6	0	0	0	0	0	1	0	0	0		0	6	3	6	3	3	2	2	4	5	4	4	4	4	4	4	4	4	4	4	3	3	3	3	3	4	3	3	3	3	1	1	4
49	1	1	43	6	Reducing debt after taking a pay cut/	6	0	0	0	0	0	1	0	0	0		0	7	5	1	4	4	1	1	1	5	1	1	1	5	1	3	5	1	5	1	3	3	5	1	1	1	3	1	5	4	1	1	4
139	1	1	47	6	The biggest stressor is that my estranged husband quit his job and has been unable to pay me any child support. He thinks I should just use savings and he will pay be back at some point in the future. All spending now stresses me out and I've tried to cut back on as many budget items as possible.	6	0	0	0	0	0	1	0	0	0		0	6	6	1	3	1	4	2	1	4	4	3	1	2	2	4	5	5	4	5	2	5	1	1	5	5	4	5	5	3	3	2	3
144	1	0	34	6	I had to get gifts for family and my significant other for the holidays but did not have nearly enough money to buy everything. Instead of using credit and digging a hole I decided to work part time at a contractor job when I had free hours. This time was very stressful because I did not have any time to myself during this period.	6	0	0	0	0	0	1	0	0	0		0	5	3	4	6	5	1	3	1	4	3	2	2	3	1	1	1	5	2	2	3	2	3	3	2	3	3	3	3	4	1	1	4
164	1	1	24	6	My husband and I were working a seasonal job across the country for a second year, the job provided the flights, housing, transportation and a fair hourly wage. Last season we stayed for 3 months past our original contract and they asked us to do that again this year. This season we went there mid-October, but the day before Christmas they laid us off. Because we had not been there for at least t…	6	0	0	0	0	0	1	0	0	0		0	7	7	1	3	2	5	3	4	2	5	5	4	1	3	3	2	5	2	5	2	5	1	1	5	5	4	5	5	4	1	1	4
270	1	1	48	6	Financial difficulties due to recent divorce.	6	0	0	0	0	0	1	0	0	0		0	7	6	2	1	4	1	2	4	2	1	1	2	2	1	2	1	4	2	5	2	4	2	1	4	5	4	4	5	4	2	2	4
282	1	1	27	6	Financial difficulties would be my main stressor as I sometimes worry about not having enough money. I can pay my bills every month, but I am unable to save as much money as I would like. If an emergency were to happen I would be in dire straits.	6	0	0	0	0	0	1	0	0	0		0	5	5	5	4	4	4	4	1	4	5	4	1	4	1	3	4	4	2	4	2	3	3	2	4	3	4	3	4	3	4	3	3
327	1	1	48	6	The business I have worked for for many years was forced to close and interesting, well-paying jobs are nonexistent in my area. I have to chose to move alone or stay here with no career options and a very low income. (this was before covid)	6	0	0	0	0	0	1	0	0	0		0	7	7	4	2	4	4	2	2	5	2	2	2	2	3	5	5	4	5	2	3	2	3	2	3	2	3	3	4	2	4	4	1
397	1	1	23	6	In the last three month, the biggest stressor I have faced is financial. From graduating college and being financially independent for less than a year, unforeseen life events can be very stressful.	6	0	0	0	0	0	1	0	0	0		0	6	3	4	7	3	4	2	3	4	3	1	1	1	1	2	2	1	1	4	2	5	1	1	5	5	4	5	5	4	2	1	4
398	1	0	36	6	My biggest stressor lately has been how deeply in debt I am. This is from having 3 dental implants last year, and for someone who likes to be financially empowered and on top of things like I do, it can feel suffocating.	6	0	0	0	0	0	1	0	0	0		0	5	1	7	4	7	1	2	3	3	2	2	1	2	1	2	2	1	2	1	4	2	4	2	2	2	2	2	4	2	3	1	4
460	1	1	34	6	I was attempting to purchase my first home. So much has happened lately. I'm unable to go to house showings or open houses. So much of my down payment has disappeared since the stock market crash.	6	0	0	0	0	0	1	0	0	0		0	4	4	3	2	3	2	3	3	3	2	2	2	2	2	2	3	3	3	5	1	4	1	1	4	5	5	5	5	4	1	1	4
44	1	0	58	6	Obviously due to the coronavirus the biggest stress I faced is financial. The stock market has dropped approximately 25%. I'm working remotely at home on a reduced salary. I worry that if the country is closed for another month which it looks like it will be that we were going through a depression	6	0	0	0	0	0	1	0	0	0		1	7	7	1	2	1	1	1	1	1	3	1	1	1	1	1	1	1	1	3	3	3	4	3	3	2	3	2	3	3	1	1	3
122	1	0	36	6	Without a doubt the biggest stress has been finances, mainly due to the ongoing pandemic.	6	0	0	0	0	0	1	0	0	0		1	7	7	5	3	4	4	4	1	5	2	4	1	5	2	4	5	5	3	2	3	4	3	2	2	1	3	3	4	2	4	3	2
191	1	1	38	6	Financial difficulties due to the coronavirus outbreak.	6	0	0	0	0	0	1	0	0	0		1	5	5	2	2	2	1	1	1	3	1	1	1	1	1	1	1	1	1	5	1	5	1	1	5	5	5	5	5	4	2	1	4
234	1	1	40	6	Worrying about the Corona virus, and if I or my loved ones will catch it. Also, normal essential items I need are either out of stock in store and online, or the brands I use and afford aren't available, and the ones that are are too expensive for my limited income, even the dry cat food I need for my pets	6	0	0	0	0	0	1	0	0	0		1	7	7	1	2	1	1	3	1	4	4	1	1	3	1	1	1	2	4	4	5	5	2	1	5	5	1	4	5	2	3	4	2
444	1	1	34	6	I recently lost my job due to the coronavirus pandemic. This has put me under considerable stress and I'm facing financial difficulties. It is a very difficult situation and I'm uncertain what is going to happen.	6	0	0	0	0	0	1	0	0	0		1	7	7	1	1	1	1	2	1	2	2	1	2	3	1	1	1	3	1	5	1	5	1	1	5	5	5	5	5	4	1	1	4
442	1	1	42	7	Not working because where i work is shut down because of Covid-19.	6	0	0	0	0	0	1	0	0	0		1	7	7	1	1	1	4	3	1	1	3	3	3	2	1	1	2	3	1	5	2	4	3	2	4	2	4	3	4	4	1	1	4
14	1	0	18	7	I've faced a serious gambling addiction problem recently that had me almost lose everything. In the beginning I was gambling just for fun but then it started being something that I couldn't control and I started losing a lot of money which made me probably the most stressed I've been in recent times.	6	0	0	0	0	0	1	0	0	0		0	7	7	7	5	3	4	5	3	3	4	3	5	3	4	4	3	4	5	3	4	4	4	3	5	2	2	2	3	3	2	3	4
70	1	1	54	7	Was trying to build up a small business so I could quit my regular job and also the relationship I was had fallen apart. He was arrested and a whole lot of complications with that started.	6	0	0	0	0	0	1	0	0	0		0	7	7	1	1	1	4	3	4	2	4	1	3	2	1	2	2	3	1	5	1	5	1	1	5	5	5	5	5	4	3	3	1
120	1	1	50	7	I'd have to say that money/future would be my biggest stressor, worrying about getting out of debt, worrying about getting my house fixed up. I need a lot of repairs and I can't get it done.	6	0	0	0	0	0	1	0	0	0		0	5	4	7	2	6	2	3	1	4	4	1	1	2	2	5	5	3	5	4	3	4	2	2	3	4	3	4	4	3	4	2	1
156	1	1	47	7	We are experiencing ongoing financial difficulty because my husband is out of work due to a car accident. The insurance settlement was not as expected.	6	0	0	0	0	0	1	0	0	0		0	7	7	1	1	1	5	5	1	3	5	3	4	5	1	1	1	5	2	4	3	4	4	3	4	4	3	2	3	1	2	1	3
207	1	1	57	7	I stress over meeting my financial difficulties each month. I owe quite a bit on my credit cards and have gotten in over my head on them. It always seems to work out that I can make my payments but then run short in other ways such as groceries and gas, etc. and end up putting those types of things back on my credit cards each month.	6	0	0	0	0	0	1	0	0	0		0	5	7	7	3	4	4	5	1	5	3	5	1	5	5	5	5	5	5	3	4	3	4	3	3	2	2	2	3	3	3	2	4
227	1	1	67	7	Financial Stress. Not enough to make ends meet.	6	0	0	0	0	0	1	0	0	0		0	5	4	5	4	4	3	3	2	4	3	3	2	3	1	2	3	3	2	4	1	4	4	1	4	4	5	2	5	3	3	2	3
254	1	1	53	7	The biggest stressor I faced over the last three months was not being able to pay rent, being threatened with eviction for my family, and having to turn to extended family for help.	6	0	0	0	0	0	1	0	0	0		0	6	7	7	6	7	3	3	1	4	4	4	1	2	1	2	4	4	4	5	2	5	1	2	4	5	4	5	4	2	4	4	2
276	1	1	29	7	The biggest stressor in the last few months has been financial difficulty	6	0	0	0	0	0	1	0	0	0		0	6	6	7	4	6	4	4	2	4	4	3	2	4	3	4	4	4	4	4	1	4	1	1	4	4	5	5	5	3	3	3	2
358	1	1	24	7	Financial difficulties. I am rapidly blowing through my savings as I am in a program where I don't have the ability to work. I worry when my money will run out and don't want to take on additional debt	6	0	0	0	0	0	1	0	0	0		0	7	7	3	4	3	1	2	2	5	2	1	2	4	1	4	2	4	1	5	2	4	2	3	4	4	4	4	3	3	3	1	4
62	1	0	25	7	The biggest stressor I have faced over the last three months has been losing my job do to the corona virus. I am now worried about how to make an income and pay my rent and car payment and insurance.	6	0	0	0	0	0	1	0	0	0		1	5	5	2	2	1	3	3	3	4	2	3	4	4	2	3	2	4	2	3	4	3	3	3	3	3	2	3	3	3	2	1	3
188	1	1	38	7	I'm s freelancer and all my work got cancelled due to COVID-19. I have some emergency savings but it won't be enough to get me through the summer, which is my usual slow season.	6	0	0	0	0	0	1	0	0	0		1	4	4	1	2	1	1	1	1	1	1	1	2	1	1	1	1	1	1	4	2	3	2	2	4	3	4	4	4	3	1	1	4
229	1	1	28	7	The last three months have presented a lot of uncertainty due to the Coronavirus. I have been unsure of whether my fiance and I would have enough resources and food, whether we would be able to work to afford to live for the next few months, and whether we would be able to take care of the dog if either of us got sick.	6	0	0	0	0	0	1	0	0	0		1	5	6	1	3	1	4	3	2	3	3	3	2	2	1	2	4	5	2	3	1	4	2	1	4	4	5	4	5	1	2	1	4
230	1	1	62	7	Concern we do not have the financial resources to make it through the pandemic.	6	0	0	0	0	0	1	0	0	0		1	6	5	4	1	1	3	4	2	3	3	4	2	4	3	2	2	4	2	4	2	4	2	2	4	4	4	4	4	3	2	1	4
453	1	0	38	7	Everything has been going well over the past 3 months until coronvirus took over the globe. The only stressors I have had were relationship related and those were not very significant. As of this point, everything is starting to become a stressor but mostly finances if I had to specify only one.	6	0	0	0	0	0	1	0	0	0		1	5	5	2	3	2	1	1	1	2	1	1	3	2	1	1	1	1	1	4	3	4	2	1	4	4	3	4	5	3	2	1	4
86	1	0	30	8	financial difficulties have been the biggest stressor. I live in a place that is very expensive and it is easy to accumulate debt if you aren't careful.	6	0	0	0	0	0	1	0	0	0		0	5	5	4	4	3	2	4	4	5	3	4	2	4	1	3	4	4	2	3	2	5	3	1	4	2	4	3	5	3	2	1	4
102	1	0	33	8	My biggest stressor was money. I had several things break that needed to be replaced and had to get all my prescriptions too. I also owe someone money and I had to choose between paying for things rather than paying for everything that I need.	6	0	0	0	0	0	1	0	0	0		0	5	5	6	3	4	3	4	4	3	4	4	4	4	4	2	4	4	4	3	4	3	5	5	3	3	2	1	1	2	1	2	3
105	1	0	38	8	Our inability to pay down our credit debt.	6	0	0	0	0	0	1	0	0	0		0	4	5	7	1	2	4	5	2	5	5	3	1	4	2	5	5	5	2	5	1	5	1	1	4	5	5	5	5	4	1	1	4
401	1	0	25	8	The most stressful thing faced within the last 3 months is the stock market going way down.	6	0	0	0	0	0	1	0	0	0		0	6	7	1	1	1	4	4	2	2	2	2	1	2	2	2	4	4	4	4	4	4	4	4	3	1	2	2	2	4	4	1	2
436	1	1	55	8	I haven't been making money in the stock market. When I made money in the stock market I could use that money to pay expenses.	6	0	0	0	0	0	1	0	0	0		0	4	7	2	3	2	2	1	1	2	1	1	1	1	1	1	1	2	1	3	3	5	3	2	3	3	3	3	4	3	3	2	3
450	1	1	31	8	Paying for childcare that we can't send our kids to due to shelter-in-place orders	6	0	0	0	0	0	1	0	0	0		0	7	7	1	1	2	3	2	2	4	3	2	3	3	2	5	3	3	3	2	3	1	3	2	3	2	3	3	4	3	2	2	4
40	1	0	56	8	I haven't had any major stressors related to this virus outside of a lack of money but I always have that	6	0	0	0	0	0	1	0	0	0		1	5	5	2	2	2	4	3	2	4	4	4	2	3	2	4	4	4	4	4	2	4	2	2	4	4	4	4	4	2	3	3	2
71	1	1	21	8	The biggest stressor over the last three months was my job shutting down due to the coronavirus pandemic and having no income.	6	0	0	0	0	0	1	0	0	0		1	7	7	1	1	7	4	5	3	5	5	2	2	4	1	1	1	5	3	5	2	5	1	1	5	4	4	5	5	3	3	3	4
129	1	0	54	8	It has to be money..There just dose not ever seem to be enough..And now its even worse with virus situation..	6	0	0	0	0	0	1	0	0	0		1	5	6	7	7	6	5	4	1	5	2	3	2	4	3	2	4	4	2	3	2	3	3	2	3	4	4	3	4	4	4	2	3
154	1	1	41	8	The biggest stressor that I faced in the last three months would be this current covid pandemic. In the last three weeks, I have been out of work, and no known date to return to work.	6	0	0	0	0	0	1	0	0	0		1	7	7	1	1	1	1	1	1	1	1	1	1	1	1	1	1	2	2	3	1	3	2	1	4	3	5	4	5	4	1	2	4
341	1	0	27	8	Ongoing stress with the recent Covid-19 pandemic that is affecting my financial health and general well-being.	6	0	0	0	0	0	1	0	0	0		1	7	7	2	2	1	2	4	1	5	4	2	1	4	2	3	3	4	3	4	2	4	2	1	4	4	4	4	5	2	3	3	2
416	1	1	27	9	Last month I received my bonus at work, and the percentage that was put into my 401k was not what I thought I had set it to be (it was much larger). I was very concerned because this would mean I max out my 401k contribution limit far earlier in the year than expected, and may not receive my full company matching amount (resulting in a loss several thousand dollars contributed to my 401k). I also…	6	0	0	0	0	0	1	0	0	0		0	6	6	3	6	4	2	4	1	4	3	3	1	3	1	4	3	4	3	3	5	5	3	1	4	2	1	3	5	3	2	1	3
434	1	0	58	10	It was financial. I lost a monthly income.	6	0	0	0	0	0	1	0	0	0		0	6	6	5	2	1	2	3	1	3	2	4	2	3	3	4	3	3	4	4	2	4	3	1	2	3	4	3	5	3	2	2	1
253	1	0	39	2	The biggest by far would be getting laid off from my job because it wasn't considered an essential function in the state I live. It's cause enormous financial stress.	7	0	0	0	0	0	0	1	0	0		0	7	7	1	1	1	4	2	2	4	2	2	2	2	1	1	1	4	2	4	2	4	2	2	4	4	4	4	4	3	2	2	3
1	1	1	31	3	Work- unable to advance in my current position.	7	0	0	0	0	0	0	1	0	0		0	6	6	3	4	3	3	1	1	3	1	1	2	1	1	1	1	2	1	5	2	5	1	1	5	5	4	5	5	4	1	1	4
246	1	0	50	3	My company laid off a bunch of people in January (about 5% total). The company is experiencing some financial difficulties. It was rumored for some time (about 2-3 months) that there could be some layoffs, but there was no information about when or how many. Even once the layoffs happened, there were a lot of questions about what would happen going forward.	7	0	0	0	0	0	0	1	0	0		0	6	6	1	5	1	1	4	1	2	2	1	1	3	1	1	2	4	1	2	4	2	3	2	2	2	2	3	4	2	4	2	3
248	1	0	40	3	My biggest concern is my job security. There have been many layoffs in my company the past few years, and I wonder if I will be next.	7	0	0	0	0	0	0	1	0	0		0	5	7	1	1	1	5	5	3	4	4	1	2	5	2	1	3	5	5	1	5	1	5	5	1	1	1	1	1	2	3	3	2
324	1	0	47	3	I changed jobs at the beginning of February. I left a 'comfortable' 10-year position in state government for the risk of purchasing a small business.	7	0	0	0	0	0	0	1	0	0		0	5	1	7	5	7	4	3	2	4	2	4	2	2	2	3	3	3	4	3	3	5	2	1	4	2	3	4	5	3	3	2	4
328	1	0	28	3	I faced a situation where I wasn't sure if I sent a child home on the right bus after school. The 10 minutes where myself and other staff figured out what happened were very stressful. Thankfully the child had ended up going home the right way.	7	0	0	0	0	0	0	1	0	0		0	6	5	7	7	4	2	2	2	2	1	1	2	1	1	2	1	2	1	2	3	4	3	3	2	3	3	3	3	2	3	2	3
387	1	0	23	3	Over the past three months my largest stressor would be my boss from work as she is extremely difficult to work with and actively verbally abuses the coworkers which has caused morale to basically hit a new low.	7	0	0	0	0	0	0	1	0	0		0	6	7	1	2	1	5	5	4	5	5	4	2	4	1	5	3	5	5	5	2	4	5	1	4	4	4	1	5	3	4	4	2
111	1	1	30	3	The biggest stressor i've faced recently is transitioning to work from home during the covid-19 spread.	7	0	0	0	0	0	0	1	0	0		1	6	6	1	3	1	1	1	1	2	1	1	1	1	1	1	1	1	2	5	1	5	1	1	4	5	5	5	5	3	1	1	4
200	1	0	35	3	The biggest stressor I've faced over the last three months has been the uncertainty over my job. Even before coronavirus my workplace was undergoing a lot of change due to budget difficulties, but now with the virus things have gotten even more uncertain.	7	0	0	0	0	0	0	1	0	0		1	5	4	1	1	1	2	3	2	1	1	1	3	1	1	1	1	2	1	4	2	5	1	1	5	4	4	5	5	3	1	1	4
210	1	0	28	3	My work is definitely the biggest stressor I have. I'm a teacher and the last week (3/9-13) before schools were shut down for COVID-19 were extremely stressful. I was tasked with trying to teach students while also acting as if nothing crazy was going on in the outside world. Many students were absent because their parents wouldn't let them go to school for fear of them getting the virus.	7	0	0	0	0	0	0	1	0	0		1	5	5	1	4	2	2	3	2	4	2	3	2	3	1	2	2	4	4	3	2	4	2	2	3	3	4	4	4	3	2	1	4
263	1	1	42	3	The biggest stressor over the last 3 months has been the sudden change with working and schooling conditions currently due to COVID-19. We changed into working from home and homeschooling our kids literally overnight, with no preparations.	7	0	0	0	0	0	0	1	0	0		1	7	5	1	4	1	2	2	1	3	3	3	2	3	2	2	2	3	2	4	2	4	2	2	4	5	4	4	4	3	3	2	3
356	1	1	40	3	I was laid off from my job due to the coronaviris. It is unknown if my employer will ever reopen or if they are closed permanently.	7	0	0	0	0	0	0	1	0	0		1	7	5	1	1	1	1	1	1	1	1	1	1	1	1	1	1	1	1	5	1	5	1	1	5	5	5	5	5	4	1	1	4
23	1	0	20	4	job stressors	7	0	0	0	0	0	0	1	0	0		0	7	6	4	6	7	3	2	4	3	3	3	2	3	3	3	3	4	3	4	3	3	3	3	3	2	3	3	3	2	3	2	2
48	1	1	28	4	Not getting enough done at work, struggling to produce new and useful project data and not filling my time with enough productive work	7	0	0	0	0	0	0	1	0	0		0	6	3	7	2	3	2	2	1	3	1	2	2	1	2	2	2	1	2	4	1	5	1	1	4	4	5	5	5	4	1	1	4
51	1	1	27	4	I recently started my first job in my field of study, and the learning curve has been steep. Dealing with criticism at work and learning things quickly has been particularly stressful, especially when something is not done correctly and I have to redo it.	7	0	0	0	0	0	0	1	0	0		0	5	2	6	5	3	2	3	2	3	2	2	2	3	2	4	4	3	4	4	3	5	2	1	4	4	3	4	5	3	2	1	3
53	1	1	37	4	I was interviewing for a promotion within my department and had no idea what to expect from either the process or the interview itself.	7	0	0	0	0	0	0	1	0	0		0	6	4	7	6	2	5	2	1	4	4	3	1	2	1	2	1	5	2	2	5	4	4	2	3	3	1	2	4	3	4	3	2
67	1	0	39	4	We recently had lay offs at my work and I felt like there was a strong chance I could be one of them.	7	0	0	0	0	0	0	1	0	0		0	7	6	4	4	2	2	3	4	3	4	2	2	2	2	2	3	2	2	3	2	3	3	3	3	3	4	3	3	3	2	2	3
132	1	0	41	4	I had a hardware failure at work that required me to fully restore a major file server from backups. It's a process that takes several days and many people could not work until it was completed.	7	0	0	0	0	0	0	1	0	0		0	7	7	2	7	3	3	2	3	4	3	1	3	4	1	1	1	5	2	2	4	4	4	3	2	2	2	2	3	2	1	2	4
133	1	1	35	4	i had decided to make a change in my personal life that would envolve to quit my job. Right before i announced to my director he offered me a promotion.	7	0	0	0	0	0	0	1	0	0		0	7	7	3	6	7	2	3	1	1	1	1	4	2	1	1	1	4	1	5	1	5	1	1	5	5	5	5	5	4	2	1	4
151	1	0	58	4	The biggest stressor is having to switch to teaching completely online... and master new technologies.	7	0	0	0	0	0	0	1	0	0		0	5	4	2	4	1	2	3	2	3	3	4	2	4	2	3	2	4	4	3	2	4	2	1	4	2	4	4	5	2	3	2	3
157	1	0	30	4	Many of my co-workers are micro managers and intrusive. I enjoy working with my clients but my co-workers are oddly enough the biggest stressors in my life. In order to get past this I have come to ignore and work on my own self goals.	7	0	0	0	0	0	0	1	0	0		0	7	5	1	7	2	1	1	1	2	2	5	1	1	1	2	2	3	1	1	3	2	4	3	3	1	3	2	3	4	1	1	3
173	1	1	24	4	I have a coworker who, in her poor choice of words and actions, causes the whole department we work in to look bad. Recently, she has made fellow students cry, she has been incredibly rude to fellow coworkers, and she has even made professors upset enough to suggest that her coworkers lodge a complaint with our higher-ups and suggest she shouldn't have her job.	7	0	0	0	0	0	0	1	0	0		0	7	7	3	1	1	1	1	1	3	3	1	1	2	1	2	1	2	2	3	4	3	3	2	4	3	2	3	4	3	3	2	3
224	1	0	43	4	The most major source of stress I have been facing over the last 3 months is struggling to secure a full time job. I have have been doing sporadic freelance work, but it's not nearly enough to cover my expenses. With the current pandemic, the situation has only gotten worse.	7	0	0	0	0	0	0	1	0	0		0	6	6	4	1	3	2	2	1	2	1	1	2	2	1	2	1	2	2	5	1	5	1	1	5	4	5	5	5	3	3	1	3
252	1	1	42	4	I have work stress. My boss is a pain. She think she knows everything and in reality knows nothing. She makes everyone’s life a living hell.	7	0	0	0	0	0	0	1	0	0		0	5	6	1	1	1	2	1	1	1	1	1	1	1	1	1	1	2	1	2	4	2	3	4	2	2	2	3	2	3	2	1	4
315	1	1	29	4	Demands from work is my biggest source of stress from the past three months.	7	0	0	0	0	0	0	1	0	0		0	6	6	3	4	2	2	4	1	3	2	2	1	4	1	2	1	4	2	3	3	3	3	2	3	2	3	3	4	3	3	3	2
350	1	0	25	4	Got laid off from job	7	0	0	0	0	0	0	1	0	0		0	6	5	1	1	1	2	4	2	4	5	3	2	3	2	1	1	4	2	2	2	3	2	1	3	5	4	4	5	3	1	1	4
84	1	1	34	4	Uncertainty about employment due to COVID-19. Unable to perform job remotely and city I live in is shutdown.	7	0	0	0	0	0	0	1	0	0		1	7	7	1	2	1	4	4	2	4	5	3	4	4	5	4	4	5	3	3	1	4	2	1	4	4	5	4	5	3	2	3	2
92	1	1	55	4	The biggest stressor I've been facing in the past 3 months has been job security. My industry is undergoing some major changes and my job role may be fazed out very soon. The current pandemic is accelerating the situation.	7	0	0	0	0	0	0	1	0	0		1	7	6	1	3	1	2	4	3	5	5	5	2	3	1	3	3	5	4	3	3	4	3	2	4	3	3	3	4	3	2	2	4
94	1	1	31	4	I'm a freelance writer, and I had primarily been working with a very specialized company. The company abruptly had to part ways with all of its contract writers at the end of January owing to a new law that the state it was based in had passed, which was a disappointment for me. I had enough savings to take a few weeks off before looking for more freelance work, which I did, but that ended up mea…	7	0	0	0	0	0	0	1	0	0		1	6	7	4	3	3	3	5	1	4	5	4	1	3	2	3	3	5	3	3	2	2	3	2	1	3	4	3	4	3	1	2	4
344	1	0	24	4	When I returned home from a family trip to Colorado, my girlfriend and I both started exhibiting symptoms that aligned with the COVID-19 virus. I ended up having to fight to take 2 weeks off to quarantine from my work, even though I work at a hospital, because they wanted me to come back ASAP and it didn’t feel safe to me.	7	0	0	0	0	0	0	1	0	0		1	6	4	5	5	3	4	3	1	4	2	2	1	2	2	3	2	3	3	4	4	4	2	2	4	5	2	4	4	3	2	1	4
360	1	1	59	4	My husband and I are business owners. Things have been going really well until this virus is putting many things on hold.	7	0	0	0	0	0	0	1	0	0		1	6	6	1	1	1	1	1	1	1	1	1	1	1	1	1	1	1	1	4	1	4	1	1	4	4	5	5	5	3	1	1	3
27	1	0	25	5	I was working to change jobs, and the the process itself was very stressful	7	0	0	0	0	0	0	1	0	0		0	5	1	7	7	5	2	2	1	2	1	1	1	2	1	1	1	1	1	4	1	4	2	1	3	4	5	4	5	4	3	1	4
36	1	0	23	5	I received a phone call from my employer a couple of days ago, and I was laid off. I have been continuously worrying about my expenses because I did not save much money in my savings account.	7	0	0	0	0	0	0	1	0	0		0	7	7	1	1	1	3	1	1	2	1	1	1	2	1	1	1	4	1	4	1	5	1	1	4	5	5	5	5	4	1	1	4
64	1	0	24	5	The biggest stress I experience regularly is not enough time, for anything. I have the day's work to do from Yesterday when I should be sleeping for the work I'm doing today. It's maddening.	7	0	0	0	0	0	0	1	0	0		0	7	5	6	7	7	3	5	1	5	5	5	5	5	5	5	5	5	5	4	2	4	1	1	4	3	4	5	5	4	1	3	3
74	1	1	28	5	Applying to different jobs and looking for a new career.	7	0	0	0	0	0	0	1	0	0		0	6	5	7	3	5	2	2	1	2	3	3	1	4	3	4	4	5	3	5	1	5	1	1	5	5	5	5	5	3	3	3	2
75	1	0	40	5	The biggest stressor I faxed was as follows..My supervisor has been harassing me verbally,breaking HIPPA laws and throwing items at me. Changing my clock in hours so that appears like ibsgow up late for work. I have reported him several times. I will wait and see the outcome.	7	0	0	0	0	0	0	1	0	0		0	7	7	1	2	2	4	3	2	4	3	2	2	2	2	2	2	2	2	3	3	3	3	3	3	3	3	3	3	3	2	2	3
80	1	0	36	5	having a slow period in work where i am not earning a lot	7	0	0	0	0	0	0	1	0	0		0	4	4	1	7	1	1	1	1	1	1	1	3	1	1	1	1	2	1	2	1	3	1	1	2	2	5	5	5	3	1	1	4
83	1	0	27	5	I had three really big things that I had to complete by roughly the same day. Each thing required some time to prepare and get done.	7	0	0	0	0	0	0	1	0	0		0	5	3	7	7	5	4	4	2	3	2	2	2	4	1	5	4	4	1	4	2	3	2	1	3	4	4	4	5	3	2	1	3
115	1	1	55	5	Concerns of too much work and getting it all done by the due date	7	0	0	0	0	0	0	1	0	0		0	5	3	2	5	3	1	1	1	3	2	2	1	1	1	3	3	4	2	2	4	3	2	2	2	2	2	4	4	4	1	1	4
126	1	1	55	5	My biggest stressor in the last three months was trying to find a new job after the loss of my old job.	7	0	0	0	0	0	0	1	0	0		0	5	5	1	4	2	3	2	2	2	2	2	2	2	1	2	2	4	2	4	2	4	2	2	4	4	4	4	4	3	1	1	3
161	1	0	28	5	There was a shift in management at my current employer which caused my role to significantly change unexpectedly and produced a good amount of uncertainty about the future of it	7	0	0	0	0	0	0	1	0	0		0	4	2	1	6	1	5	3	3	4	4	4	2	4	2	2	3	4	2	3	2	3	2	2	3	3	4	4	4	3	2	1	4
165	1	0	30	5	My biggest stressor has been my co-workers and dealing with them. They arent very self sufficient and need to be monitored a little more often than most would like and it causes some stress in having to manage them.	7	0	0	0	0	0	0	1	0	0		0	5	4	4	4	5	3	3	4	4	2	3	3	4	2	3	3	4	3	3	2	3	2	2	3	3	4	4	4	3	2	2	4
204	1	1	30	5	Being stressed out at work due to increased volume	7	0	0	0	0	0	0	1	0	0		0	5	5	2	4	2	3	3	2	4	4	4	2	3	2	4	4	4	5	1	4	1	4	4	2	1	2	2	2	3	2	2	4
237	1	0	28	5	Definitely work related; in an environment where it feels Im doing three times the work of the other employee for a quarter of the pay.	7	0	0	0	0	0	0	1	0	0		0	4	3	5	1	1	3	3	2	2	4	2	3	4	2	2	3	4	2	3	3	4	2	2	3	3	3	4	4	3	2	2	3
294	1	1	30	5	My new boss at work is a horrible person who only cares about herself.	7	0	0	0	0	0	0	1	0	0		0	6	6	1	3	1	3	2	2	2	2	2	2	2	2	2	2	3	2	4	2	5	2	1	5	4	4	4	5	4	2	2	3
451	1	0	31	5	A bird that was at work stressed me a client who went to re check a computer and while I was checking he spoke and said he knew it was the problem. I shake because if I knew so much why it was not the same that I checked his team	7	0	0	0	0	0	0	1	0	0		0	5	4	3	3	4	3	3	4	3	3	4	3	2	4	3	2	4	3	2	4	3	3	4	2	4	2	3	2	3	2	3	3
98	1	1	51	5	The biggest recent stressor that I have encountered and continue to encounter is the effect of the Covid-19 on my occupation. I am a secondary high school educator and I have been very concerned (stressed) over providing online resources/instruction while honoring my district and state guidelines.	7	0	0	0	0	0	0	1	0	0		1	5	4	1	4	1	1	1	2	3	4	2	3	4	1	1	1	2	1	3	2	3	2	2	3	4	4	4	4	3	1	1	4
155	1	0	48	5	Just one week ago, amid the Covid-19 pandemic crisis and need for social distancing and sheltering in place, my company had to lay me off due to a slow down. I have no idea how long his layoff will be and am unsure how I will make ends meet.	7	0	0	0	0	0	0	1	0	0		1	7	7	1	1	1	3	1	1	1	1	1	3	4	1	1	1	3	1	4	1	4	1	1	4	4	5	5	5	3	3	3	3
297	1	1	55	5	The biggest stressor in the last three months happened 3 weeks ago. I was told that my job was furloughed until further notice due to COVID-19.	7	0	0	0	0	0	0	1	0	0		1	7	7	1	1	1	1	3	3	2	1	1	1	1	1	1	1	3	2	5	1	5	1	1	5	5	5	5	5	4	1	1	4
391	1	0	54	5	The recent Coronavirus situation has made my employment situation tenuous.	7	0	0	0	0	0	0	1	0	0		1	6	7	1	1	1	1	2	1	3	1	1	1	2	1	2	1	2	2	4	2	4	3	2	3	4	4	3	4	4	1	1	4
419	1	0	32	5	I have recently had stress problems because I have to work from home, it is a little more complicated to work through video conferences, but it is for our good to avoid spreading the virus	7	0	0	0	0	0	0	1	0	0		1	5	3	2	4	1	2	4	1	3	3	5	1	2	4	3	1	3	4	4	3	4	2	3	2	4	3	4	3	2	3	1	3
426	1	1	55	5	The biggest stressor I have faced in the last 3 months is the decision I have had to make to close my freelance business premises of seven years, and temporarily (I hope) halt operations. I’m sharing a studio with 3 other freelancers, and we all need to move out for various reasons and disentangle ourselves from the lease. Packing and moving in the middle of a pandemic is also adding to the stres…	7	0	0	0	0	0	0	1	0	0		1	7	6	1	5	3	2	4	1	4	5	5	3	4	5	4	3	4	2	4	3	5	1	1	4	4	3	5	5	4	1	1	3
24	1	0	34	6	My work/life balanced has been skewed.	7	0	0	0	0	0	0	1	0	0		0	5	5	6	4	5	2	3	1	3	3	4	1	3	1	1	1	5	2	2	3	4	3	2	2	2	3	3	4	3	4	2	2
118	1	1	40	6	The biggest stressor I faced was increased work load at work.	7	0	0	0	0	0	0	1	0	0		0	5	4	1	6	4	3	2	1	3	2	1	1	2	1	1	2	3	2	4	2	4	2	2	4	3	4	4	4	3	1	1	4
121	1	0	25	6	Being unemployed due to health related issues, then when I’m well enough to start working again the coronavirus happens and most financial industry jobs aren’t available right now and places have halted the hiring process.	7	0	0	0	0	0	0	1	0	0		0	5	5	6	2	3	3	4	4	5	4	4	3	3	1	3	3	3	4	4	3	4	4	4	4	5	3	2	2	3	4	4	1
194	1	0	48	6	Previously, my biggest stressor was job related. I faced challenges at work that threatened my self-perceived risk of losing my job. I was worried that my boss didn't like the work I was performing and was being extremely critical of my work.	7	0	0	0	0	0	0	1	0	0		0	6	6	6	3	4	2	2	1	2	1	2	1	2	1	2	2	2	2	4	1	4	2	1	4	4	5	4	5	4	1	1	4
250	1	1	34	6	The biggest stressor I faced over the last three months was a lack of time to complete all the tasks I needed to do in my job. I simply had too many people expecting too much of me, and not enough time to get everything done.	7	0	0	0	0	0	0	1	0	0		0	5	4	3	3	4	4	4	2	3	4	5	2	4	1	3	3	4	3	5	3	4	2	3	4	5	3	4	3	2	3	3	2
285	1	0	28	6	There was one week at work where I was dealing with a meeting involved with one of my students and it felt like it was never ending with the work involved.	7	0	0	0	0	0	0	1	0	0		0	7	3	3	7	5	1	1	1	5	1	5	1	1	1	3	1	5	5	1	5	1	5	4	1	5	1	1	2	3	1	1	4
293	1	0	27	6	I work as a Sous chef in London so doing a good job and keeping customers happy while making sure the restaurant is making money is the biggest stressor in the past three months	7	0	0	0	0	0	0	1	0	0		0	5	4	5	5	6	3	4	2	3	2	4	3	4	1	1	1	3	2	3	2	2	2	2	3	3	4	4	4	3	2	1	4
331	1	1	34	6	I was overlooked for career advancement (manager) at my current job. My people leader decided to hire someone who has fewer years of experience than myself, as well as has no management experience.	7	0	0	0	0	0	0	1	0	0		0	7	7	1	1	3	1	1	3	4	4	1	3	1	1	1	1	1	1	2	4	4	3	3	3	3	2	3	3	3	3	2	4
349	1	0	48	6	A part-time job's factory temporarily shuttered, so I was furloughed indefinitely.	7	0	0	0	0	0	0	1	0	0		0	5	5	2	2	2	1	1	1	1	2	1	2	1	1	1	1	1	1	4	2	4	2	2	3	4	4	4	4	3	2	1	3
354	1	0	24	6	Workplace stress, the demand / expectations for things to be done.	7	0	0	0	0	0	0	1	0	0		0	5	3	6	7	5	1	4	2	5	1	1	1	3	2	3	1	2	3	2	4	2	2	2	2	3	2	4	4	3	1	1	3
365	1	0	25	6	Recording a voice over for a gig. Kept worrying if the voice over I was recording was good enough and I kept re-recording over lines I wasn't happy with.	7	0	0	0	0	0	0	1	0	0		0	5	4	7	6	6	1	1	1	1	1	1	1	1	1	1	1	1	1	2	3	3	3	2	3	3	3	3	4	3	1	3	4
429	1	0	56	6	I agreed to fill in as a temporary manager for an fast-casual cafe that was really busy and burning through managers. Near the end of my first shift the store received a collect call from the other manager, who was unable to work her half of the day to close. That resulted in my working several 5AM to 11PM shifts as store manager. If I failed, the doors would have to close, which would get corpor…	7	0	0	0	0	0	0	1	0	0		0	7	6	1	7	7	3	2	2	4	1	2	2	2	1	2	2	1	2	4	3	5	2	2	4	4	3	4	4	3	2	2	3
437	1	0	37	6	My biggest stress would definitely be work. I work in the testing department and they are looking to automate that process which would basically mean I would lose my job.	7	0	0	0	0	0	0	1	0	0		0	6	6	3	2	2	3	3	3	4	3	3	3	4	3	3	3	3	4	3	4	4	3	3	4	4	2	3	3	3	1	1	4
462	1	0	32	6	The biggest stress factor for me in the last three months has been my job situation and finances. It is so uncertain.	7	0	0	0	0	0	0	1	0	0		0	7	7	7	3	3	5	5	2	5	5	4	2	5	5	5	5	5	5	5	1	5	1	1	5	3	5	5	5	1	4	4	1
17	1	0	37	6	Problems with work. I'm a small business owner and sales have been very up and down. COVID-19 has only added to the uncertainty.	7	0	0	0	0	0	0	1	0	0		1	5	5	3	2	3	1	3	1	4	1	2	1	3	1	2	3	3	3	4	2	4	3	2	3	5	4	3	4	2	3	2	2
199	1	0	28	6	I think the biggest stressor was this surgence of the coronavirus. I've had reduced work hours which was a consequence of the virus.	7	0	0	0	0	0	0	1	0	0		1	7	7	1	4	1	3	2	3	5	4	3	2	3	4	4	5	5	5	5	1	5	1	1	5	5	5	5	5	3	4	4	1
201	1	1	62	6	I am a caregiver for an elderly patient. His family was preparing to put him into a nursing home, which was the right thing to do. When COVID-19 struck, they decided not to put him in a facility. My job changed from challenging to downright difficult.	7	0	0	0	0	0	0	1	0	0		1	5	3	1	1	1	3	2	1	4	3	1	2	1	1	1	1	2	1	4	2	5	4	1	5	4	4	2	5	3	1	1	1
258	1	1	42	6	the biggest stressor has been that my elementary school kids went on school spring break a week early due to covid-19 and now school is cancelled the rest of the school year, i have to feed and educate them unexpectedly. and i still gotta work	7	0	0	0	0	0	0	1	0	0		1	7	5	1	3	1	4	4	2	5	3	4	3	2	1	3	2	3	2	3	3	4	2	4	4	4	3	4	2	3	2	1	3
320	1	1	49	6	The biggest stressor I have faced is with my job, and issues related to COVID-19. During the second week in March, my employer (a large private university) announced it would be moving to remote learning for students for the remainder of the semester. However, they did not give staff (including me) any guidance on whether we should continue to come to the office or work remotely. In fact, for sev…	7	0	0	0	0	0	0	1	0	0		1	6	6	1	3	1	3	4	1	3	4	2	1	3	3	4	5	3	5	4	2	4	1	2	4	4	4	5	4	3	4	4	2
368	1	1	59	6	Working with the public at Dollar General during the Covid 19 outbreak.	7	0	0	0	0	0	0	1	0	0		1	4	4	1	2	1	2	1	1	1	1	2	3	1	1	1	1	2	1	4	4	4	3	2	3	3	2	3	4	3	2	1	4
385	1	0	32	6	Due to Covid-19, I was laid off from my job.	7	0	0	0	0	0	0	1	0	0		1	7	7	2	1	1	3	3	3	4	3	3	3	4	3	3	2	4	3	4	2	3	2	2	4	4	4	4	4	3	3	3	2
399	1	1	57	6	I work in the tourism industry. With the covid 19 virus it was very stressful having to cancel so many events and that's a literally all that we did for about 2 weeks. The main part of my job is helping these people pull off their events and now with them all be cancelled it was very stressful	7	0	0	0	0	0	0	1	0	0		1	7	6	2	3	1	4	4	3	3	4	3	2	4	1	2	1	4	4	4	2	4	2	1	5	5	4	4	5	3	2	1	3
50	1	0	27	7	Job stressors involving hitting deadlines and feeling like I don't know enough to do my job.	7	0	0	0	0	0	0	1	0	0		0	6	5	6	5	6	4	4	2	5	2	4	2	3	1	2	2	2	3	3	2	4	2	2	4	4	4	4	4	4	3	1	3
73	1	1	27	7	My biggest stressor involved making a decision on whether or not to search for another job. The new job would involve a move and it was stressful to have to decide what to do.	7	0	0	0	0	0	0	1	0	0		0	5	5	6	5	7	1	1	2	2	1	1	2	1	1	1	1	2	1	2	4	3	4	3	4	3	2	2	3	3	4	2	2
99	1	1	52	7	I lost my job and having to support myself I have no income to pay my bills especially the rent. With the thought of going homeless, I began to stress , more than I can tell you	7	0	0	0	0	0	0	1	0	0		0	7	7	7	1	4	3	3	1	5	3	3	1	1	1	1	1	3	1	5	1	5	1	1	5	5	5	5	5	3	1	1	4
152	1	1	25	7	Switching to working from home and being responsible for childcare	7	0	0	0	0	0	0	1	0	0		0	5	3	1	5	3	1	2	1	2	1	1	2	1	1	1	1	2	1	4	1	4	1	1	4	4	5	5	5	4	1	1	4
217	1	1	55	7	Last week I was furloughed because the company I work for is considerened non-essential. The company my husband works for is going to begin to furlough people on April 6th. So like millions of other people I am now out of work and don't know if I will ever have a job to go back too.	7	0	0	0	0	0	0	1	0	0		0	7	7	1	1	1	1	1	1	3	5	5	1	3	1	1	1	5	5	5	1	4	1	1	5	5	5	5	5	3	1	1	3
231	1	0	42	7	I have worked from home for three years. My income has improved, but it is not enough to live comfortably or improve my living situation. My worry has been finding more steady work and think long term	7	0	0	0	0	0	0	1	0	0		0	4	2	6	3	4	4	3	2	4	2	2	2	2	1	4	3	4	3	3	3	4	3	2	3	2	3	3	4	3	2	1	3
335	1	0	53	7	I was working overnights, 12 hour shifts. I was having trouble sleeping during the day and had to work all night, five days a week. The job was very slow and the nights went on forever.	7	0	0	0	0	0	0	1	0	0		0	6	7	6	7	6	2	1	1	3	1	1	2	1	1	1	1	2	1	2	4	4	3	2	2	1	2	3	4	2	3	1	2
449	1	0	33	7	The biggest stressor that I faced over the last three months has definitely been job-related. We have a very large matter that I am in charge of, and there of been a number of large developments and a heavy amount of things to juggle. I have been working around the clock and have not had much time to spend with family or to sleep.	7	0	0	0	0	0	0	1	0	0		0	6	2	6	5	5	2	2	2	2	2	2	2	2	1	2	2	3	2	4	2	4	4	2	3	4	4	2	4	3	2	2	4
4	1	1	31	7	losing my job due to coronavirus	7	0	0	0	0	0	0	1	0	0		1	7	7	1	1	1	1	1	1	1	1	1	1	1	1	1	1	2	1	5	3	5	1	1	5	5	3	5	5	3	2	1	3
66	1	1	40	7	Trying to get the emergency structure for covid testing up in place.	7	0	0	0	0	0	0	1	0	0		1	7	4	6	7	5	2	1	1	1	1	1	2	1	1	1	1	3	2	1	3	3	1	3	4	4	3	5	3	3	1	1	4
107	1	0	49	7	i was notified that i was being furloughed from my job due to the coronavirus pandemic	7	0	0	0	0	0	0	1	0	0		1	6	6	1	1	1	2	1	2	3	2	1	2	2	1	2	1	1	2	3	2	3	2	2	3	4	4	4	4	3	2	2	4
239	1	1	35	7	I would say work. Uncertainties with the coronavirus situation and not having clear expectations for work. Not knowing what I should/should not be doing or everything up in the air makes me nervous and stressed.	7	0	0	0	0	0	0	1	0	0		1	7	7	5	4	1	1	1	1	3	3	1	1	4	1	3	2	2	1	4	4	4	1	1	5	4	2	5	5	3	4	2	2
325	1	0	21	7	Life complications due to corona virus, chiefly the loss of my job and temporary loss of my social life.	7	0	0	0	0	0	0	1	0	0		1	6	7	3	2	2	3	3	4	4	2	3	4	3	2	2	2	3	2	5	3	4	2	2	4	4	3	4	4	3	2	2	4
336	1	0	22	7	My boss is old (in her mid 70s). When the COVID-19 panic started, she was not concerned. She has had upper respiratory issues for most of her life. She has this one project that she has been working on for years that I have been helping her complete and it is near the end. But, the stressful part, was deciding if I should keep going in or not to limit her exposure. Ultimately, I decided that I di…	7	0	0	0	0	0	0	1	0	0		1	5	3	2	2	3	2	2	1	3	2	1	1	2	1	1	1	3	1	3	2	4	2	2	3	4	4	4	4	4	3	2	3
355	1	1	25	7	Job security due to coronavirus.	7	0	0	0	0	0	0	1	0	0		1	5	5	1	1	1	4	2	1	1	1	1	2	2	1	1	1	3	1	3	4	4	3	2	2	4	2	3	4	3	2	1	4
172	1	1	28	8	The biggest stressor in the last three months was adjustments to my job. We had to adjust to working from home, and we had some concerns with hiring freezes and salary freezes.	7	0	0	0	0	0	0	1	0	0		0	5	2	1	5	1	2	2	3	1	1	2	3	1	1	1	1	3	1	2	3	4	1	2	4	5	3	5	4	4	2	1	4
219	1	0	60	8	My computer died and I was unable to work until a new one arrived.	7	0	0	0	0	0	0	1	0	0		0	7	7	1	1	4	5	5	1	2	2	1	2	3	1	1	1	4	1	4	3	5	3	2	4	5	3	3	4	4	2	2	4
307	1	1	42	8	working from home while trying to care for 2 small children	7	0	0	0	0	0	0	1	0	0		0	7	4	7	4	1	1	1	1	1	1	1	1	1	1	1	1	1	1	5	1	5	1	1	5	5	5	5	5	4	1	1	3
433	1	0	25	8	I have been adjusting to a new position in my company. This spot is a lot more people oriented than my last, and I am working on multiple projects at one time.	7	0	0	0	0	0	0	1	0	0		0	6	2	6	5	5	1	4	4	4	2	2	1	2	1	1	1	3	2	1	3	4	3	3	2	2	3	3	3	4	1	1	4
117	1	1	52	8	Starting a new business. With the pandemic, I'm worried about my income in the coming years. I was supposed to be retiring in 5 years with a business to sell. Bad timing to have left a well paid job just before the pandemic began.	7	0	0	0	0	0	0	1	0	0		1	7	7	1	1	1	3	3	3	1	1	3	3	4	3	1	1	3	2	4	1	4	1	1	4	4	5	5	5	3	2	2	4
214	1	0	33	8	The biggest stressor that I faced in the past three months was stress at my job. I was denied a promotion and, while still employed, realized that I would need to find a new job. I was in the middle of said job hunt when this pandemic hit which may well greatly delay my search	7	0	0	0	0	0	0	1	0	0		1	6	6	2	3	2	2	2	1	3	2	2	1	3	2	2	2	2	2	2	4	4	2	4	2	4	2	4	2	2	3	2	3
243	1	1	20	8	I had to apply for an internship that I really wanted. I took a huge risk, since I put off applying for anything else until I knew I was accepted or not, even though waiting would leave me with little time to apply for any other internships. There was a lot of bureaucratic nonsense involved and a lot of times it seemed that my chances were slim to none of getting it. Now, I've been accepted, but …	7	0	0	0	0	0	0	1	0	0		1	7	4	5	6	5	4	4	2	3	2	2	2	4	1	4	4	4	5	4	4	4	2	2	4	3	2	4	4	3	2	2	4
377	1	0	40	8	Just recently my wife was furloughed due to the ongoing coronavirus which has shut down numerous businesses. Even though we believe its going to be a short term bump in the road, it's still very scary.	7	0	0	0	0	0	0	1	0	0		1	4	7	1	5	1	2	1	2	2	1	1	2	3	1	1	2	4	1	4	2	3	2	2	3	3	4	4	4	3	1	1	4
413	1	1	33	9	Family relationship, Job and Health stress	7	0	0	0	0	0	0	1	0	0		0	6	6	6	7	6	4	4	5	4	5	4	4	5	4	4	5	4	4	5	4	4	4	5	4	5	2	2	1	4	3	3	3
170	1	0	29	3	Our biggest stressor right now is we've recently had a house fire, and are looking for a new home.	8	0	0	0	0	0	0	0	1	0		0	7	7	1	3	1	5	5	1	2	5	5	5	5	5	5	5	5	5	5	5	5	5	5	5	5	1	1	1	4	1	1	4
131	1	1	34	3	During the past few weeks the pandemic has caused a lot of stress for my family and i. With three kids out of school and working from home we are trying to figure it all out and it's really hard to balance all of this. I have a lot of anxiety about the pandemic and am also pregnant so this is also contributing to my stress.	8	0	0	0	0	0	0	0	1	0		1	6	6	1	1	1	3	3	2	2	2	3	2	3	3	2	3	4	4	3	4	4	2	3	3	2	2	4	3	3	3	3	4
153	1	1	36	3	This whole Coronavirus ordeal	8	0	0	0	0	0	0	0	1	0		1	5	7	1	1	1	1	3	3	3	3	3	3	3	1	3	3	3	3	3	3	3	3	3	3	2	3	3	3	3	2	1	4
268	1	1	38	3	coronavirus. lost job, quarantined, parents very vulnerable, if they die, I will assume custody to 5 siblings. Bills coming due. I might die. Will the near future be radically different? How can I plan around that?	8	0	0	0	0	0	0	0	1	0		1	7	7	1	1	1	1	4	1	2	5	5	1	5	1	3	3	5	1	5	1	5	1	1	5	5	5	5	5	3	4	3	2
290	1	0	56	3	Tghe biggest stressor I have faced in teh last 3 months is the overarching stress regarding COVID-19, which has changed our lives materially.	8	0	0	0	0	0	0	0	1	0		1	5	5	1	4	2	2	2	2	2	1	1	2	1	1	1	1	1	1	4	2	4	2	1	4	4	4	4	5	3	1	1	3
409	1	0	32	3	COVID-19 and the economic and social impact. There is a lot more uncertainty in life and I have become used to stability. This has been a large adjustment.	8	0	0	0	0	0	0	0	1	0		1	5	6	1	6	1	1	3	3	3	3	4	3	2	1	3	2	2	1	3	3	4	2	2	2	2	3	4	4	3	2	1	3
146	1	1	27	4	The biggest stressor for me is COVID-19. I worked two jobs but I have already been laid off of one, and I am stressing that I will soon be laid off from the other. I am stressed thinking about the deadliness of this virus and how quickly it spreads, and the people that aren't taking it seriously. It has become almost all consuming.	8	0	0	0	0	0	0	0	1	0		1	7	7	1	2	2	2	4	2	4	4	2	3	3	1	1	2	4	4	4	2	4	2	2	4	4	4	4	4	3	3	2	3
186	1	0	40	4	This little thing called covid 19.	8	0	0	0	0	0	0	0	1	0		1	7	7	1	1	7	4	4	5	5	4	4	5	5	4	3	4	5	3	3	4	3	3	4	1	2	2	3	2	3	2	1	3
366	1	0	36	5	I am unsure about my future. I do not know what is going to happen. I feel like I am floating in limbo. It is difficult not to worry.	8	0	0	0	0	0	0	0	1	0		0	4	2	6	3	2	1	2	3	2	4	1	2	3	1	2	2	3	2	3	2	3	4	2	3	4	4	2	4	3	4	2	3
381	1	0	33	5	I was driving on my route for work when I was hit head on by another vehicle. The accident was not my fault, in fact, the other driver said he was on his phone at the time. Luckily, nobody was really injured that bad, but it definitely could have been worse! My car was ruined, along with my day. I had to find a replacement for my vehicle quickly because they needed me back for work that next day.	8	0	0	0	0	0	0	0	1	0		0	6	6	1	5	1	1	1	1	3	1	1	2	1	1	1	1	3	1	5	1	5	2	1	4	5	5	4	5	4	1	1	4
187	1	0	35	5	The most stressful event I have faced recently is related to the outbreak of COVID-19 in the US. I have both a four-year-old and a newborn. A few weeks ago (and still to some extent today) hoarders began buying everything and anything in stores. This was very stressful for me because it made it seem like the future was very much uncertain. I didn't know if we were going to be able to get enough f…	8	0	0	0	0	0	0	0	1	0		1	6	7	1	4	3	3	3	1	2	2	3	3	2	1	1	3	4	2	1	2	2	3	2	2	1	4	3	4	3	4	3	3
279	1	1	49	5	The biggest stressor of the last few months has certainly been the COVID-19 outbreak. I am a theatre performer, and was already out of work, but any chance of work has dried up for now. Not visiting with family and friends is hard, and of course worry for the world in general.	8	0	0	0	0	0	0	0	1	0		1	7	7	1	1	2	2	1	1	1	1	2	2	1	1	1	1	4	1	4	1	5	1	1	5	5	5	5	5	4	2	1	4
373	1	0	72	5	Two weeks ago I was in Mexico. Because of the confused, disorganized, inconsistent messages from President Trump as he tried to "Manage" the growing epidemic, plus threats of closing the border "immediately" was pretty damn stressful.	8	0	0	0	0	0	0	0	1	0		1	5	5	1	7	4	1	1	1	4	3	2	1	2	1	1	1	2	1	3	3	3	2	1	4	4	3	4	5	4	1	1	4
415	1	0	34	5	Coronavirus causing my whole way of life to change.	8	0	0	0	0	0	0	0	1	0		1	7	7	1	1	1	1	1	1	2	1	1	1	1	1	1	1	3	1	3	2	5	3	1	3	5	4	3	5	3	1	1	4
95	1	1	62	6	CORONAVIRUS!	8	0	0	0	0	0	0	0	1	0		1	7	5	1	1	3	5	4	2	3	1	2	5	3	1	1	1	5	3	5	1	5	1	1	5	5	5	5	5	4	1	2	3
213	1	0	27	6	Amid the outbreak of COVID-19, my wife and I have not been working, and half of our household income is based on hourly wages. We are also starting a big transition period in our life - a move out of state - and some plans seem to be halted, leaving us unsure about what to do.	8	0	0	0	0	0	0	0	1	0		1	7	7	1	2	1	3	5	1	4	4	2	1	5	2	3	2	5	3	4	4	4	2	2	4	5	2	4	4	3	2	1	3
225	1	0	40	6	Well i'm sure like most people would say today, It has been dealing with the uncertainty of the complete shutdown of society because of Covid-19. It isn't just the thought of maybe getting sick, but not knowing if things will ever go back to "normal".	8	0	0	0	0	0	0	0	1	0		1	7	6	1	1	1	1	2	1	3	2	3	2	2	1	2	2	3	2	4	2	4	3	2	4	3	4	3	4	2	3	3	3
304	1	1	27	6	The biggest stressor I have faced is this COVID-19 situation. I have taken a pay cut and I'm concerned I will be laid off.	8	0	0	0	0	0	0	0	1	0		1	7	7	1	1	1	1	1	2	2	2	2	3	1	1	1	2	3	2	5	4	5	2	1	3	3	2	4	5	3	3	2	2
396	1	0	59	7	It is time to renew our apartment lease. My roommate is coy and threatening to not sign in a city with a tight rental market espcially in our price range.	8	0	0	0	0	0	0	0	1	0		0	7	6	1	3	2	2	3	2	2	2	1	3	3	1	1	1	3	1	5	1	4	2	1	4	4	5	4	5	4	3	2	1
140	1	0	31	7	The restrictions placed on day to day life by my local government to try to contain the coronavirus have been the most stressful in the last three months. My daily routine is completely upended, I cannot buy the food or household goods I usually purchase, and I am worried about losing my job.	8	0	0	0	0	0	0	0	1	0		1	5	7	1	1	1	3	5	1	4	5	5	1	4	3	3	4	4	4	2	4	2	4	4	2	2	2	2	2	2	3	3	3
286	1	1	30	7	My parents were unexpectedly terminated from their positions as restaurant managers, throwing our family into chaos. They have no savings and few job prospects besides what they were already doing. And now, with the closure of most restaurants due to COVID-19, their situation is still tenuous.	8	0	0	0	0	0	0	0	1	0		1	5	6	2	2	2	4	1	2	2	2	1	3	1	1	1	1	3	1	5	1	5	1	1	5	5	5	5	5	4	2	1	3
10	1	0	35	8	My biggest stressor of the last three months was coming to terms with the fact that I hate where I live and cutting social ties here to return to my country of birth.	8	0	0	0	0	0	0	0	1	0		0	6	6	7	1	5	4	4	3	4	2	2	2	4	2	2	2	1	2	2	4	2	4	4	2	2	2	2	2	2	2	2	4
16	1	0	28	8	School and the prospect of an internship coming up are the biggest stressors for me.	8	0	0	0	0	0	0	0	1	0		0	7	7	7	7	1	5	5	2	4	4	4	3	3	4	4	4	4	4	2	5	4	4	3	1	3	1	2	3	1	4	3	1
123	1	1	45	8	Shut down of social and work life due to Covid-19	8	0	0	0	0	0	0	0	1	0		1	7	7	4	4	1	4	4	4	4	3	3	2	3	2	2	3	3	3	2	3	3	2	2	3	3	3	4	4	3	2	2	4
296	1	0	37	8	The coronavirus. It causes my wife to lose three jobs, my teaching to go online, and overall constant anxiety about the state of society.	8	0	0	0	0	0	0	0	1	0		1	6	6	2	3	2	4	4	1	2	2	1	2	4	1	2	2	4	2	5	1	5	2	1	4	4	5	4	5	3	1	1	4
428	1	0	27	8	Honestly, the coronavirus has been the most stressful part of the last few months. It has changed everything - the way I work, grad school, relationships.	8	0	0	0	0	0	0	0	1	0		1	7	7	1	1	1	1	1	1	2	1	1	1	1	1	1	1	1	1	5	2	4	1	1	5	5	4	5	5	3	2	2	2
189	1	0	25	9	My hot was hit by 2 tornadoes and I my dad died suddenly in 18 months time. That as been over 2-years and I am still not nearly the same person that I was.	8	0	0	0	0	0	0	0	1	0		0	7	7	1	1	1	1	1	3	3	3	1	1	4	1	1	1	4	2	5	1	5	1	1	5	5	5	5	5	4	1	1	1
197	1	1	35	2	Coronavirus shutting down the world is the biggest stressor. My nephew's school closed down two weeks ago, which is when it became "real" here. My state is under a "safer-at-home" order so now my family is holed up at home, and I'm worried about being careful with infrequent grocery trips and avoiding going out otherwise. Taking walks is stressful as I'm constantly on the lookout for other pedest…	9	0	0	0	0	0	0	0	0	1	global pandemic	1	6	5	1	1	1	2	2	3	3	2	1	3	2	1	1	1	4	2	2	4	3	3	3	2	2	2	3	3	3	3	2	3
466	1	1	46	3	My biggest stressor is caused by a situation that I am in that I cannot describe here, but the results of being in this situation have made just the act of living my life and thinking of the future very stressful. Wondering where I will live, how I will afford to live, wondering how my health will be since I have no insurance, it is all very stressful!	9	0	0	0	0	0	0	0	0	1	Conflict with someone.	0	7	7	2	1	1	2	4	1	4	4	4	1	4	3	4	4	5	4	5	1	5	1	1	5	5	5	5	5	4	4	4	1
141	1	1	43	3	Uhh, coronavirus. All the fear, all the unaligned perspectives. Living with 2 70+ old parents who weren't taking it seriously at all, when I was ready to lock us down at Wuhan. Having to balance my anger/resentment/fear/frustration/and sadness; wanting to not pollute their frequencies and immune systems while they continued to live life as normal, making only small changed, way to slowly.	9	0	0	0	0	0	0	0	0	1	increasingly deadly global pandemic	1	7	7	1	3	7	1	2	1	4	1	4	1	2	1	2	2	3	3	3	2	4	3	2	4	4	4	3	4	2	3	3	3
208	1	1	66	3	Clearly, the biggest stressor over the last month has been Covid-19 and distancing myself from family, as well as figuring out the best way to get groceries and other things we might need.	9	0	0	0	0	0	0	0	0	1	Coronavirus	1	7	5	1	1	4	1	1	1	1	1	1	3	2	1	1	1	3	1	5	1	4	2	1	5	5	5	4	5	3	1	1	4
378	1	0	31	3	Figuring out how to change my plans to depart the country I am living in after COVID-19 messed those plans up.	9	0	0	0	0	0	0	0	0	1	Job & future	1	5	7	3	2	3	3	4	2	2	3	3	2	2	1	2	2	2	2	3	2	5	2	2	2	4	4	4	4	3	3	2	2
400	1	1	43	4	I had a wonderful cat who had cancer that had gone to her lungs. She was given 3 months and yet a year later she was still with me. I could see her decline in her last few weeks though and it was heartbreaking. I would cry almost nightly making sure to do so when she would not be around me. Even though she was an animal I still feel she would have been able to feel my distress and she did not nee…	9	0	0	0	0	0	0	0	0	1	loss of a pet	0	7	7	6	4	1	3	5	1	1	2	2	1	4	1	1	1	1	3	5	1	5	1	1	5	5	5	5	5	4	4	4	1
435	1	0	25	4	The biggest stressor for me in the last three months was moving into my new house. It took a lot of time and money to move in and get everything settled.	9	0	0	0	0	0	0	0	0	1	Housing	0	5	2	6	6	5	1	1	1	3	1	1	1	4	1	2	1	2	3	3	4	3	4	3	2	2	2	2	3	2	2	2	3
31	1	1	47	4	Covid19	9	0	0	0	0	0	0	0	0	1	pandemic and imminent collapse of our economy	1	7	7	1	1	1	1	1	1	1	1	1	1	1	1	1	1	1	1	5	1	5	1	1	5	5	5	5	5	4	2	1	4
89	1	1	39	4	right now one and the only stress is COVID 19, lot of pressure about this diseases. can't get out of the house, I can't go to work, I am in terrible condition all around	9	0	0	0	0	0	0	0	0	1	It,s about whole life	1	7	2	2	6	4	5	5	2	5	5	5	5	5	1	2	3	4	4	4	2	5	5	4	4	5	4	1	2	4	1	4	2
308	1	1	47	4	The virus causing everyone to move home. My daughter returned from college and my husband is working from home and we’re having to stay home.	9	0	0	0	0	0	0	0	0	1	Financial, future, and health	1	5	7	1	1	1	4	1	1	3	3	2	1	1	1	2	2	3	2	5	1	5	2	1	4	4	5	4	5	4	1	1	4
326	1	1	55	4	Being out of work for the past 2 weeks, worrying about my kids & fteying to ind enough food & supplies for my family & on top of that worrying about one of us catching COVID-19.	9	0	0	0	0	0	0	0	0	1	Health, financial, & job	1	7	7	1	1	1	1	1	4	1	4	1	1	3	1	1	2	3	1	3	2	4	2	3	4	5	4	4	3	3	2	2	1
3	1	1	27	5	Having to move into our new house was a big stress. Our previous realtors made the process a nightmare and almost forgot to giv eus important paperowkr, plus we encountered some unforseen plumbing expenses in our new build also.	9	0	0	0	0	0	0	0	0	1	homeownership	0	6	3	3	6	4	4	4	2	5	5	4	2	4	2	2	1	5	2	2	4	5	4	2	4	4	2	2	4	3	2	1	2
249	1	1	67	5	For me the biggest one is not being able to go to routine health care visits, dental cleaning, physical therapy appointment, routine eye doctor check up. I am fine though, I have no urgent problems and am able to stay home all the time . It was a bit stressful getting stocked up with supplies but I got it done . I'm good	9	0	0	0	0	0	0	0	0	1	Just getting stocked up	0	3	3	1	7	7	1	1	1	1	3	2	4	1	1	1	1	1	1	2	2	3	3	3	4	5	4	3	3	2	1	1	4
163	1	1	37	5	COVID-19 crisis, schools closed and having to work from home.	9	0	0	0	0	0	0	0	0	1	basically all the options above	1	7	7	1	1	1	1	3	3	3	3	3	3	3	3	3	3	3	3	4	1	4	4	1	3	4	5	2	5	3	2	3	2
266	1	1	58	5	I am not suppose to go anywhere because of the corona-virus I needed chicken food, dog food and cat food. I ordered it on line and went to farm and fleet and drove around back to there pick up spot. I got what I needed. It was stressful trying to figure out what you need to do.	9	0	0	0	0	0	0	0	0	1	virus	1	5	4	3	7	6	1	1	1	2	1	1	3	2	1	1	1	2	1	3	1	3	1	1	3	4	5	5	5	3	2	2	3
367	1	1	45	5	The impact of COVID-19 on our family and job.	9	0	0	0	0	0	0	0	0	1	Economic	1	7	7	1	1	1	3	2	5	4	3	4	2	1	1	2	5	4	4	3	4	4	1	1	4	3	2	5	5	3	2	1	1
424	1	0	29	5	problems with the Covid-19 virus	9	0	0	0	0	0	0	0	0	1	COvid-19	1	7	7	1	1	1	3	4	3	3	4	3	3	4	3	3	3	2	3	5	4	4	3	2	4	4	2	3	4	3	1	1	1
467	1	0	29	5	My biggest stress has been the problem of the Covid-19 virus, it has changed people's lives drastically	9	0	0	0	0	0	0	0	0	1	COVID-19	1	7	7	1	3	2	4	3	3	4	3	3	3	3	4	3	3	2	3	3	3	2	3	3	3	3	3	3	3	4	1	1	1
103	1	1	29	6	The biggest stressor that I have faced would be in regards to the coronavirus. This has completely changed my life and my financial situation. I am currently working from home for my main job but lost my second job due to the circumstances.	9	0	0	0	0	0	0	0	0	1	Corona Virus	1	6	5	1	1	1	1	1	1	3	1	1	1	1	1	1	1	1	1	3	1	3	2	2	2	2	5	4	4	3	2	1	2
109	1	0	35	6	Being stuck inside the apartment and away from outside social contact for the past three weeks.	9	0	0	0	0	0	0	0	0	1	Covid-19 stay at home	1	6	7	1	2	3	1	1	1	1	1	1	2	1	1	1	1	1	1	3	1	4	2	1	4	4	5	4	5	3	1	1	4
97	1	1	37	7	I lost my mom suddenly and without warning a month ago. She was fine one day, admitted to the ER with shortness of breath the next day and the day after that she was dead.	9	0	0	0	0	0	0	0	0	1	Death	0	7	7	5	1	1	1	4	2	3	3	1	1	3	1	3	1	5	3	5	1	5	1	1	5	5	5	5	5	2	3	3	2
405	1	1	52	7	The lose of my fiance has been very heartbreaking for me. Struggling to just get by.	9	0	0	0	0	0	0	0	0	1	Death	0	7	5	6	1	1	4	3	2	3	2	1	4	3	1	1	1	4	1	4	1	4	2	1	3	5	5	4	5	3	4	2	4
37	1	1	21	7	As a person graduating from an art school amidst the coronavirus pandemic and looming economic collapse, future post-grad plans that prior seemed extremely hopeful now are insecure, putting my future financial stability at risk as I have to support myself while also paying off my loans	9	0	0	0	0	0	0	0	0	1	Coronavirus Pandemic	1	6	7	1	2	1	4	4	2	4	4	2	2	4	2	3	4	4	4	4	2	2	2	3	3	2	4	4	3	3	3	2	3
58	1	1	32	7	Our biggest stressor has been all the effects from COVID-19. We are all stuck at home together with not much to do. People are buying the stores out of a lot of groceries and it's difficult to make a meal with what is left. We are having to be creative and patient during this time.	9	0	0	0	0	0	0	0	0	1	pandemic	1	5	5	1	1	1	2	3	1	4	3	2	1	3	1	3	3	4	2	3	4	4	3	2	3	3	2	3	4	3	3	2	3
402	1	1	49	8	Before COVID-19 the biggest stressor in my life was prepping to become host home for adults with developmental delays while also managing a new promotion's responsibilities at work and moving to a new (larger & more expensive) home, needed in order to host.	9	0	0	0	0	0	0	0	0	1	Time, financial, job, practical, combined	0	6	1	7	4	7	1	3	1	4	2	2	4	1	1	1	2	4	1	5	2	5	2	1	4	4	4	4	5	3	3	2	4
87	1	1	63	8	up untill the virus threat i was not feeling stressed at all. the stress now is the same as any but ive taken the measures to prepare and can do what i need at home alone without worry of the outside	9	0	0	0	0	0	0	0	0	1	threat of shut down	1	3	7	1	7	1	2	2	2	4	1	2	3	3	1	2	1	1	1	5	1	5	1	1	5	5	5	5	5	4	1	1	4
147	1	0	50	8	Being isolated, cut off from others b/c of the Coronavirus	9	0	0	0	0	0	0	0	0	1	isolation	1	7	7	1	1	1	4	3	1	2	2	1	1	3	1	4	3	3	3	5	2	4	2	2	4	4	4	4	4	2	4	4	1
274	1	0	36	8	Coronavirus - It has been stressful dealing with the pandemic and trying to balance child care and working from home as a result.	9	0	0	0	0	0	0	0	0	1	pandemic	1	6	7	1	2	1	1	1	1	2	1	1	2	2	1	1	1	1	2	4	2	4	1	1	1	3	4	5	5	3	1	1	4
311	1	1	37	8	coronavirus	9	0	0	0	0	0	0	0	0	1	Global pandemic/health threat	1	7	7	1	1	1	1	1	1	3	2	1	3	1	1	2	1	3	2	4	4	3	2	2	4	3	2	4	4	3	2	1	4
281	1	1	18	9	I am a 18 year old mother of twins with a bad relationship with the babies dad	9	0	0	0	0	0	0	0	0	1	family and romantic	0	7	5	3	1	4	2	3	2	2	2	2	3	3	1	1	1	1	1	4	1	5	1	1	4	5	5	5	5	2	1	1	4
393	1	0	30	9	Losing my business before it even got fully started, becoming fully unemployed, losing my health insurance, and not having enough money to pay rent because of CoronaVirus.	9	0	0	0	0	0	0	0	0	1	CoronaVirus	1	7	7	3	1	1	4	5	1	5	4	3	1	2	3	3	4	4	4	4	1	4	3	3	2	3	5	3	3	3	2	4	4
[truncated: 35 more columns]
